# Supplementary material for: Aluminium complex-catalysed hydroboration of alkenes and alkynes
Source: Royal Society of Chemistry journal article supplement (doi:10.1039/c9nj01859j), 2019-01-01
Supplement: c9nj01859j1.pdf [file c9nj01859j1.pdf]

Supporting Information for

## Aluminium complex–catalysed hydroboration of alkenes and alkynes

Adimulam Harinath,<sup>a</sup> Indrani Banerjee,<sup>a</sup> Jayeeta Bhattacharjee<sup>a</sup> and Tarun K. Panda<sup>\*a</sup>

### Table of contents

**Table TS1.** Crystallographic data and refinement parameters of **1**.

**FS1.** <sup>1</sup>H NMR spectrum (400 MHz, 25°C, C<sub>6</sub>D<sub>6</sub>) of complex **1**.

**FS2.** <sup>11</sup>B NMR spectrum (128.4 MHz, 25°C, C<sub>6</sub>D<sub>6</sub>) of complex **1**.

**FS3.** <sup>13</sup>C NMR spectrum (100 MHz, 25°C, C<sub>6</sub>D<sub>6</sub>) of complex **1**.

**FS4.** <sup>1</sup>H NMR spectrum (400 MHz, 25°C, CDCl<sub>3</sub>) of **2a**.

**FS5.** <sup>11</sup>B NMR spectrum (128.4 MHz, 25°C, CDCl<sub>3</sub>) of **2a**.

**FS6.** <sup>13</sup>C NMR spectrum (100 MHz, 25°C, CDCl<sub>3</sub>) of **2a**.

**FS7.** <sup>1</sup>H NMR spectrum (400 MHz, 25°C, CDCl<sub>3</sub>) of **2b**.

**FS8.** <sup>11</sup>B NMR spectrum (128.4 MHz, 25°C, CDCl<sub>3</sub>) of **2b**.

**FS9.** <sup>13</sup>C NMR spectrum (100 MHz, 25°C, CDCl<sub>3</sub>) of **2b**.

**FS10.** <sup>1</sup>H NMR spectrum (400 MHz, 25°C, CDCl<sub>3</sub>) of **2c**.

**FS11.** <sup>11</sup>B NMR spectrum (128.4 MHz, 25°C, CDCl<sub>3</sub>) of **2c**.

**FS12.** <sup>13</sup>C NMR spectrum (100 MHz, 25°C, CDCl<sub>3</sub>) of **2c**.

**FS13.** <sup>1</sup>H NMR spectrum (400 MHz, 25°C, CDCl<sub>3</sub>) of **2d**.

**FS14.** <sup>11</sup>B NMR spectrum (128.4 MHz, 25°C, CDCl<sub>3</sub>) of **2d**.

**FS15.** <sup>13</sup>C NMR spectrum (100 MHz, 25°C, CDCl<sub>3</sub>) of **2d**.

**FS16.** <sup>1</sup>H NMR spectrum (400 MHz, 25°C, CDCl<sub>3</sub>) of **2e**.

**FS17.** <sup>11</sup>B NMR spectrum (128.4 MHz, 25°C, CDCl<sub>3</sub>) of **2e**.

**FS18.** <sup>13</sup>C NMR spectrum (100 MHz, 25°C, CDCl<sub>3</sub>) of **2e**.

**FS19.** <sup>1</sup>H NMR spectrum (400 MHz, 25°C, CDCl<sub>3</sub>) of **2f**.

**FS20.** <sup>11</sup>B NMR spectrum (128.4 MHz, 25°C, CDCl<sub>3</sub>) of **2f**.

**FS21.** <sup>13</sup>C NMR spectrum (100 MHz, 25°C, CDCl<sub>3</sub>) of **2f**.

**FS22.** <sup>1</sup>H NMR spectrum (400 MHz, 25°C, CDCl<sub>3</sub>) of **2g**.  
**FS23.** <sup>11</sup>B NMR spectrum (128.4 MHz, 25°C, CDCl<sub>3</sub>) of **2g**.  
**FS24.** <sup>19</sup>F NMR spectrum (376.5 MHz, 25°C, CDCl<sub>3</sub>) of **2g**.  
**FS25.** <sup>13</sup>C NMR spectrum (100 MHz, 25°C, CDCl<sub>3</sub>) of **2g**.  
**FS26.** <sup>1</sup>H NMR spectrum (400 MHz, 25°C, CDCl<sub>3</sub>) of **2h**.  
**FS27.** <sup>11</sup>B NMR spectrum (128.4 MHz, 25°C, CDCl<sub>3</sub>) of **2h**.  
**FS28.** <sup>13</sup>C NMR spectrum (100 MHz, 25°C, CDCl<sub>3</sub>) of **2h**.  
**FS29.** <sup>1</sup>H NMR spectrum (400 MHz, 25°C, CDCl<sub>3</sub>) of **2i**.  
**FS30.** <sup>11</sup>B NMR spectrum (128.4 MHz, 25°C, CDCl<sub>3</sub>) of **2i**.  
**FS31.** <sup>13</sup>C NMR spectrum (100 MHz, 25°C, CDCl<sub>3</sub>) of **2i**.  
**FS32.** <sup>1</sup>H NMR spectrum (400 MHz, 25°C, CDCl<sub>3</sub>) of **2j**.  
**FS33.** <sup>11</sup>B NMR spectrum (128.4 MHz, 25°C, CDCl<sub>3</sub>) of **2j**.  
**FS34.** <sup>13</sup>C NMR spectrum (100 MHz, 25°C, CDCl<sub>3</sub>) of **2j**.  
**FS35.** <sup>1</sup>H NMR spectrum (400 MHz, 25°C, CDCl<sub>3</sub>) of **2k**.  
**FS36.** <sup>11</sup>B NMR spectrum (128.4 MHz, 25°C, CDCl<sub>3</sub>) of **2k**.  
**FS37.** <sup>13</sup>C NMR spectrum (100 MHz, 25°C, CDCl<sub>3</sub>) of **2k**.  
**FS38.** <sup>1</sup>H NMR spectrum (400 MHz, 25°C, CDCl<sub>3</sub>) of **2l**.  
**FS39.** <sup>11</sup>B NMR spectrum (128.4 MHz, 25°C, CDCl<sub>3</sub>) of **2l**.  
**FS40.** <sup>13</sup>C NMR spectrum (100 MHz, 25°C, CDCl<sub>3</sub>) of **2l**.  
**FS41.** <sup>1</sup>H NMR spectrum (400 MHz, 25°C, CDCl<sub>3</sub>) of **2m**.  
**FS42.** <sup>11</sup>B NMR spectrum (128.4 MHz, 25°C, CDCl<sub>3</sub>) of **2m**.  
**FS43.** <sup>13</sup>C NMR spectrum (100 MHz, 25°C, CDCl<sub>3</sub>) of **2m**.  
**FS44.** <sup>1</sup>H NMR spectrum (400 MHz, 25°C, CDCl<sub>3</sub>) of **2n**.  
**FS45.** <sup>11</sup>B NMR spectrum (128.4 MHz, 25°C, CDCl<sub>3</sub>) of **2n**.  
**FS46.** <sup>13</sup>C NMR spectrum (100 MHz, 25°C, CDCl<sub>3</sub>) of **2n**.  
**FS47.** <sup>1</sup>H NMR spectrum (400 MHz, 25°C, CDCl<sub>3</sub>) of **2o**.  
**FS48.** <sup>11</sup>B NMR spectrum (128.4 MHz, 25°C, CDCl<sub>3</sub>) of **2o**.  
**FS49.** <sup>13</sup>C NMR spectrum (100 MHz, 25°C, CDCl<sub>3</sub>) of **2o**.  
**FS50.** <sup>1</sup>H NMR spectrum (400 MHz, 25°C, CDCl<sub>3</sub>) of **2p**.  
**FS51.** <sup>11</sup>B NMR spectrum (128.4 MHz, 25°C, CDCl<sub>3</sub>) of **2p**.

**FS52.** <sup>13</sup>C NMR spectrum (100 MHz, 25°C, CDCl<sub>3</sub>) of **2p**.  
**FS53.** <sup>1</sup>H NMR spectrum (400 MHz, 25°C, CDCl<sub>3</sub>) of **3a**.  
**FS54.** <sup>11</sup>B NMR spectrum (128.4 MHz, 25°C, CDCl<sub>3</sub>) of **3a**.  
**FS55.** <sup>13</sup>C NMR spectrum (100 MHz, 25°C, CDCl<sub>3</sub>) of **3a**.  
**FS56.** <sup>1</sup>H NMR spectrum (400 MHz, 25°C, CDCl<sub>3</sub>) of **3b**.  
**FS57.** <sup>11</sup>B NMR spectrum (128.4 MHz, 25°C, CDCl<sub>3</sub>) of **3b**.  
**FS58.** <sup>13</sup>C NMR spectrum (100 MHz, 25°C, CDCl<sub>3</sub>) of **3b**.  
**FS59.** <sup>1</sup>H NMR spectrum (400 MHz, 25°C, CDCl<sub>3</sub>) of **3c**.  
**FS60.** <sup>11</sup>B NMR spectrum (128.4 MHz, 25°C, CDCl<sub>3</sub>) of **3c**.  
**FS61.** <sup>13</sup>C NMR spectrum (100 MHz, 25°C, CDCl<sub>3</sub>) of **3c**.  
**FS62.** <sup>1</sup>H NMR spectrum (400 MHz, 25°C, CDCl<sub>3</sub>) of **3d**.  
**FS63.** <sup>11</sup>B NMR spectrum (128.4 MHz, 25°C, CDCl<sub>3</sub>) of **3d**.  
**FS64.** <sup>13</sup>C NMR spectrum (100 MHz, 25°C, CDCl<sub>3</sub>) of **3d**.  
**FS65.** <sup>1</sup>H NMR spectrum (400 MHz, 25°C, CDCl<sub>3</sub>) of **3e**.  
**FS66.** <sup>11</sup>B NMR spectrum (128.4 MHz, 25°C, CDCl<sub>3</sub>) of **3e**.  
**FS67.** <sup>13</sup>C NMR spectrum (100 MHz, 25°C, CDCl<sub>3</sub>) of **3e**.  
**FS68.** <sup>1</sup>H NMR spectrum (400 MHz, 25°C, CDCl<sub>3</sub>) of **3f**.  
**FS69.** <sup>11</sup>B NMR spectrum (128.4 MHz, 25°C, CDCl<sub>3</sub>) of **3f**.  
**FS70.** <sup>13</sup>C NMR spectrum (100 MHz, 25°C, CDCl<sub>3</sub>) of **3f**.  
**FS71.** <sup>1</sup>H NMR spectrum (400 MHz, 25°C, CDCl<sub>3</sub>) of **3g**.  
**FS72.** <sup>11</sup>B NMR spectrum (128.4 MHz, 25°C, CDCl<sub>3</sub>) of **3g**.  
**FS73.** <sup>13</sup>C NMR spectrum (100 MHz, 25°C, CDCl<sub>3</sub>) of **3g**.  
**FS74.** <sup>1</sup>H NMR spectrum (400 MHz, 25°C, CDCl<sub>3</sub>) of **3h**.  
**FS75.** <sup>11</sup>B NMR spectrum (128.4 MHz, 25°C, CDCl<sub>3</sub>) of **3h**.  
**FS76.** <sup>13</sup>C NMR spectrum (100 MHz, 25°C, CDCl<sub>3</sub>) of **3h**.  
**FS77.** <sup>1</sup>H NMR spectrum (400 MHz, 25°C, CDCl<sub>3</sub>) of **3i**.  
**FS78.** <sup>11</sup>B NMR spectrum (128.4 MHz, 25°C, CDCl<sub>3</sub>) of **3i**.  
**FS79.** <sup>13</sup>C NMR spectrum (100 MHz, 25°C, CDCl<sub>3</sub>) of **3i**.  
**FS80.** <sup>1</sup>H NMR spectrum (400 MHz, 25°C, CDCl<sub>3</sub>) of **3j**.  
**FS81.** <sup>11</sup>B NMR spectrum (128.4 MHz, 25°C, CDCl<sub>3</sub>) of **3j**.

**FS82.**  $^{13}\text{C}$  NMR spectrum (100 MHz, 25°C,  $\text{CDCl}_3$ ) of **3j**.  
**FS83.**  $^1\text{H}$  NMR spectrum (400 MHz, 25°C,  $\text{CDCl}_3$ ) of **3k**.  
**FS84.**  $^{11}\text{B}$  NMR spectrum (128.4 MHz, 25°C,  $\text{CDCl}_3$ ) of **3k**.  
**FS85.**  $^{13}\text{C}$  NMR spectrum (100 MHz, 25°C,  $\text{CDCl}_3$ ) of **3k**.  
**FS86.**  $^1\text{H}$  NMR spectrum (400 MHz, 25°C,  $\text{CDCl}_3$ ) of **4a**.  
**FS87.**  $^{13}\text{C}$  NMR spectrum (100 MHz, 25°C,  $\text{CDCl}_3$ ) of **4a**.  
**FS88.**  $^1\text{H}$  NMR spectrum (100 MHz, 25°C,  $\text{CDCl}_3$ ) of **4b**.  
**FS89.**  $^{13}\text{C}$  NMR spectrum (100 MHz, 25°C,  $\text{CDCl}_3$ ) of **4b**.

**Table TS1.** Crystallographic data and refinement parameters of **1**.

| Crystal Parameters                   | <b>1 (exp-6202)</b>                                                    |
|--------------------------------------|------------------------------------------------------------------------|
| CCDC No.                             | 1909428                                                                |
| Empirical formula                    | $\text{C}_{20}\text{H}_{22}\text{N}_2\text{PSeAl}$                     |
| Formula weight                       | 427.30                                                                 |
| $T$ (K)                              | 150(2) K                                                               |
| $\lambda$ (Å)                        | 1.54184                                                                |
| Crystal system                       | Monoclinic                                                             |
| Space group                          | $P 21/n$                                                               |
| $a$ (Å)                              | 9.5906(10)                                                             |
| $b$ (Å)                              | 13.1698(2)                                                             |
| $c$ (Å)                              | 16.0726(2)                                                             |
| $\alpha$ (°)                         | 90                                                                     |
| $\beta$ (°)                          | 103.371(2)                                                             |
| $\gamma$ (°)                         | 90                                                                     |
| $V$ (Å <sup>3</sup> )                | 1975.04(5)                                                             |
| $Z$                                  | 4                                                                      |
| $D_{\text{calc}}$ g cm <sup>-3</sup> | 1.437                                                                  |
| $\mu$ (mm <sup>-1</sup> )            | 3.799                                                                  |
| $F(000)$                             | 872                                                                    |
| Theta range for data collection      | 4.389 to 71.407 deg                                                    |
| Limiting indices                     | $-11 \leq h \leq 11,$<br>$-14 \leq k \leq 16,$<br>$-16 \leq l \leq 19$ |
| Reflections collected / unique       | 7011 / 3573<br>[R(int) = 0.0177]                                       |
| Completeness to theta                | 99.7 %                                                                 |
| Absorption correction                | Multi-scan                                                             |

|                                   |                                             |
|-----------------------------------|---------------------------------------------|
| Max. and min. transmission        | 1.00000 and 0.54170                         |
| Refinement method                 | Full-matrix least-squares on F <sup>2</sup> |
| Data / restraints / parameters    | 3753 / 0 / 229                              |
| Goodness-of-fit on F <sup>2</sup> | 1.037                                       |
| Final R indices<br>[I > 2σ(I)]    | R1 = 0.0311<br>wR2 = 0.0840                 |
| R indices (all data)              | R1 = 0.0331<br>wR2 = 0.0858                 |
| Largest diff. peak and hole       | 0.361 and -0.553 e.Å <sup>-3</sup>          |

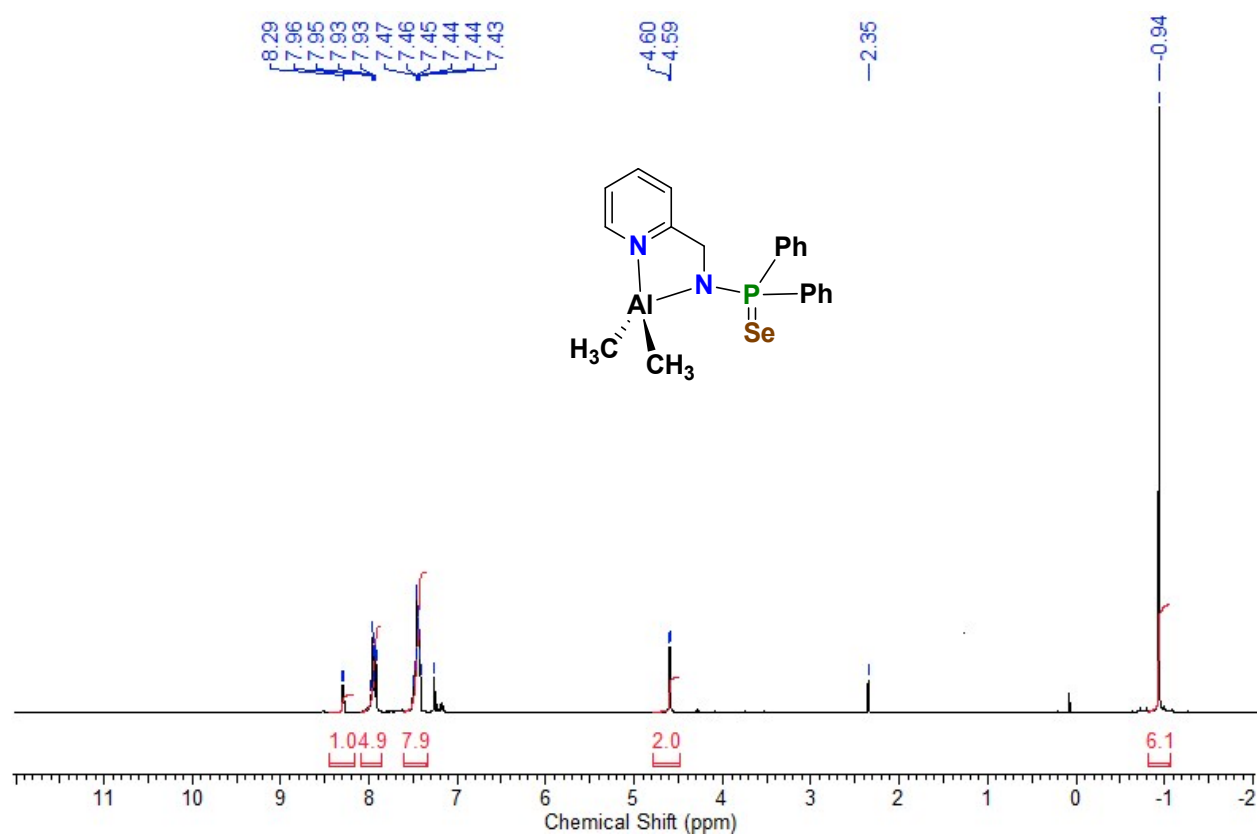

**Figure FS1.** <sup>1</sup>H NMR spectrum (400 MHz, 25°C, C<sub>6</sub>D<sub>6</sub>) of complex 1.

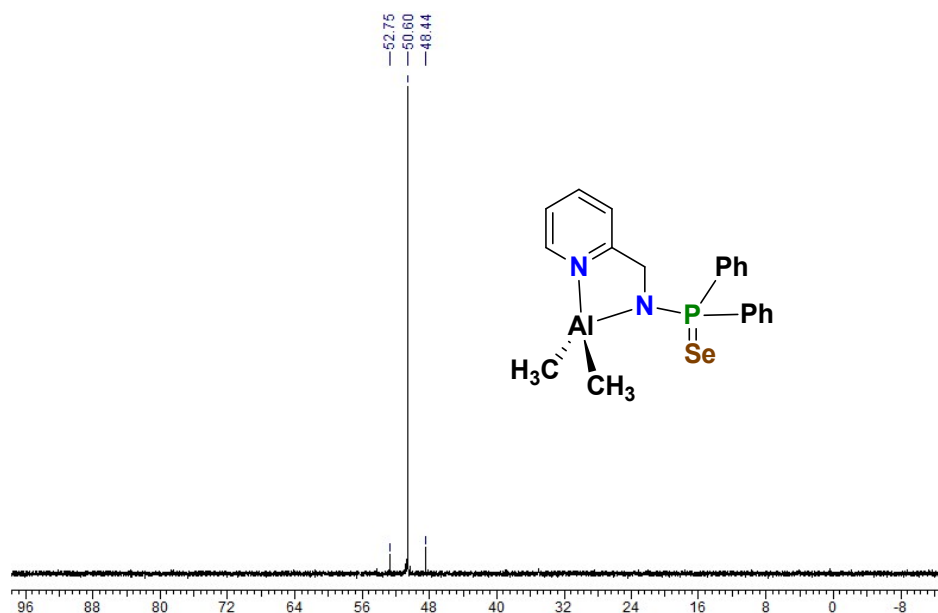

**Figure FS2.**  $^{31}\text{P}\{^1\text{H}\}$  NMR spectrum (161.9 MHz, 25°C,  $\text{C}_6\text{D}_6$ ) of complex 1.

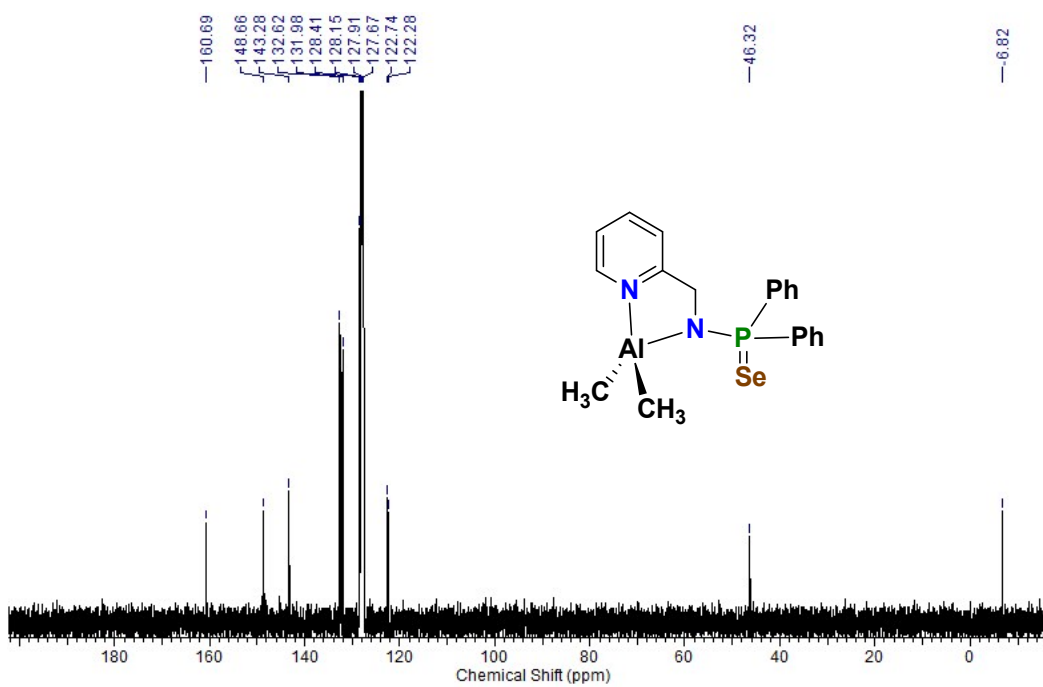

**Figure FS3**  $^{13}\text{C}\{^1\text{H}\}$  NMR spectrum (100 MHz, 25°C,  $\text{C}_6\text{D}_6$ ) of complex 1.

### General procedure for the synthesis of compounds (2a-2s and 3a-3m).

Catalyst **1** (1 mol%), alkenes (**2a-2p**) or alkynes (**3a-3k**) 0.5 mmol and respective boranes such as pinacolborane/ catecholborane (0.6 mmol) were placed in a 25 mL Schlenk flask equipped with a magnetic stir bar inside the glove box. Then the reaction mixture was stirred at 30°C for eight hours. The progress of reaction was monitored by  $^1\text{H}$  NMR spectroscopy using hexamethylbenzene (10 mol%) as an internal standard. After the reaction was completed, the resulted boronate ester product was separated by silica-gel column chromatography using hexane as an eluent. Removal of solvent under reduced pressure provided pure products for further analysis. For alkynes hydroboration was carried out in 0.5 ml toluene.

### Characterization Data

#### 4,4,5,5-tetramethyl-2-phenethyl-1,3,2-dioxaborolane (**2a**). <sup>1</sup>

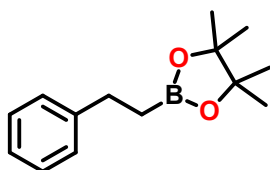

Yield: [Mass in 232.13 mg (100%), Mass out 227.48 mg (98%)].  $^1\text{H}$  NMR (400 MHz,  $\text{CDCl}_3$ ):  $\delta_{\text{H}}$  7.26 - 7.20 (m, 4H, Ar-H), 7.16 - 7.11 (m, 1H, Ar-H), 2.74 (t,  $J = 8.0$  Hz, 2H,  $\text{CH}_2$ ), 1.21 (s, 12H,  $\text{CH}_3$ ), 1.14 (t,  $J = 8.0$  Hz, 2H,  $\text{CH}_2$ ) ppm.  $^{13}\text{C}\{^1\text{H}\}$  NMR (100 MHz,  $\text{CDCl}_3$ ):  $\delta_{\text{C}}$  144.3, 128.1, 127.9, 125.4, 83.0, 29.9, 24.7 ppm.  $^{11}\text{B}\{^1\text{H}\}$  NMR (128 MHz,  $\text{CDCl}_3$ ):  $\delta_{\text{B}}$  33.8 ppm

#### 4,4,5,5-tetramethyl-2-(4-methylphenethyl)-1,3,2-dioxaborolane (**2b**). <sup>1</sup>

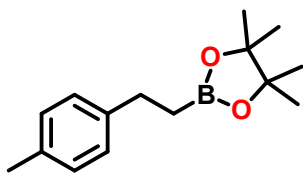

Yield: [Mass in 246.15 mg (100%), Mass out 221.53 mg (90%)].  $^1\text{H}$  NMR (400 MHz,  $\text{CDCl}_3$ ):  $\delta_{\text{H}}$  7.15 (d,  $J = 8.0$  Hz, 2H, Ar-H), 7.11 (d,  $J = 8.0$  Hz, 2H, Ar-H), 2.76 (t,  $J = 8.0$  Hz, 2H,  $\text{CH}_2$ ), 2.35 (s, 3H,  $\text{CH}_3$ ), 1.27 (s, 12H,  $\text{CH}_3$ ), 1.17 (t,  $J = 8.0$  Hz, 2H,  $\text{CH}_2$ ) ppm.  $^{13}\text{C}\{^1\text{H}\}$  NMR (100

MHz, CDCl<sub>3</sub>):  $\delta_C$  141.3, 134.7, 128.8, 127.8, 83.0, 29.4, 24.7, 20.9 ppm. <sup>11</sup>B{<sup>1</sup>H} NMR (128 MHz, CDCl<sub>3</sub>):  $\delta_B$  34.0 ppm

**2-(4-methoxyphenethyl)-4,4,5,5-tetramethyl-1,3,2-dioxaborolane (2c).**<sup>1</sup>

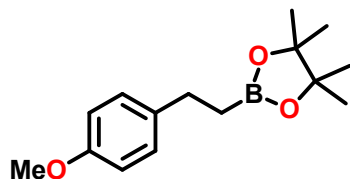

Yield: [Mass in 262.15 mg (100%), Mass out 228.07 mg (87%)]. <sup>1</sup>H NMR (400 MHz, CDCl<sub>3</sub>):  $\delta_H$  7.15 (d,  $J$  = 8.0 Hz, 2H, Ar- $H$ ), 6.82 (d,  $J$  = 8.0 Hz, 2H, Ar- $H$ ), 3.78 (s, 3H, CH<sub>3</sub>), 2.71 (t,  $J$  = 8.0 Hz, 2H, CH<sub>2</sub>), 1.23 (s, 12H, CH<sub>3</sub>), 1.13 (t,  $J$  = 8.0 Hz, 2H, CH<sub>2</sub>) ppm. <sup>13</sup>C{<sup>1</sup>H} NMR (100 MHz, CDCl<sub>3</sub>):  $\delta_C$  157.5, 136.4, 128.8, 113.5, 82.9, 55.1, 29.0, 24.7 ppm. <sup>11</sup>B{<sup>1</sup>H} NMR (128 MHz, CDCl<sub>3</sub>):  $\delta_B$  33.9 ppm.

**2-(4-(tert-butyl)phenethyl)-4,4,5,5-tetramethyl-1,3,2-dioxaborolane (2d).**<sup>2</sup>

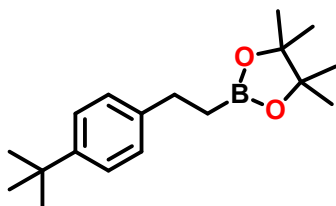

Yield: [Mass in 288.23 mg (100%), Mass out 244.99 mg (85%)]. <sup>1</sup>H NMR (400 MHz, CDCl<sub>3</sub>):  $\delta_H$  7.32 (d,  $J$  = 8.0 Hz, 2H, Ar- $H$ ), 7.19 (d,  $J$  = 8.0 Hz, 2H, Ar- $H$ ), 2.76 (t,  $J$  = 8.0 Hz, 2H, CH<sub>2</sub>), 1.34 (s, 9H, C(CH<sub>3</sub>)<sub>3</sub>), 1.26 (s, 12H, CH<sub>3</sub>), 1.18 (t,  $J$  = 8.0 Hz, 2H, CH<sub>2</sub>) ppm. <sup>13</sup>C{<sup>1</sup>H} NMR (100 MHz, CDCl<sub>3</sub>):  $\delta_C$  148.1, 141.3, 127.6, 125.0, 83.0, 34.2, 31.4, 29.3, 24.7 ppm. <sup>11</sup>B{<sup>1</sup>H} NMR (128 MHz, CDCl<sub>3</sub>):  $\delta_B$  34.1 ppm.

**2-(4-fluorophenethyl)-4,4,5,5-tetramethyl-1,3,2-dioxaborolane (2d).**<sup>2</sup>

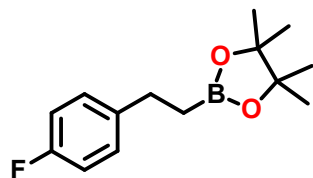



Yield: [Mass in 250.12 mg (100%), Mass out 212.60 mg (85%)].  $^1\text{H}$  NMR (400 MHz,  $\text{CDCl}_3$ ):  $\delta_{\text{H}}$  7.18 - 7.15 (m, 2H, Ar-*H*), 6.94 (t,  $J = 8.0$  Hz, 2H, Ar-*H*), 2.72 (t,  $J = 8.0$  Hz, 2H,  $\text{CH}_2$ ), 1.21 (s, 12H,  $\text{CH}_3$ ), 1.12 (t,  $J = 8.0$  Hz, 2H,  $\text{CH}_2$ ) ppm.  $^{13}\text{C}\{^1\text{H}\}$  NMR (100 MHz,  $\text{CDCl}_3$ ):  $\delta_{\text{C}}$  162.3, 159.8, 139.9, 129.3 (d,  $J = 7.0$  Hz), 114.8 (d,  $J = 20.0$  Hz), 83.1, 29.1, 24.7 ppm.  $^{11}\text{B}\{^1\text{H}\}$  NMR (128 MHz,  $\text{CDCl}_3$ ):  $\delta_{\text{B}}$  33.5 ppm

### 2-(4-Bromophenethyl)-4,4,5,5-tetramethyl-1,3,2-dioxaborolane (2e). <sup>3</sup>

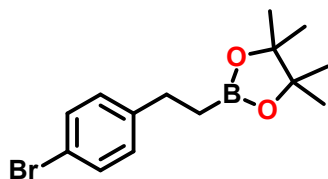

Yield: [Mass in 311.02 mg (100%), Mass out 267.47 mg (86%)].  $^1\text{H}$  NMR (400 MHz,  $\text{CDCl}_3$ ):  $\delta_{\text{H}}$  7.37 (d,  $J = 8.0$  Hz, 2H, Ar-*H*), 7.09 (d,  $J = 8.0$  Hz, 2H, Ar-*H*), 2.70 (t,  $J = 8.0$  Hz, 2H,  $\text{CH}_2$ ), 1.22 (s, 12H,  $\text{CH}_3$ ), 1.11 (t,  $J = 8.0$  Hz, 2H,  $\text{CH}_2$ ) ppm.  $^{13}\text{C}\{^1\text{H}\}$  NMR (100 MHz,  $\text{CDCl}_3$ ):  $\delta_{\text{C}}$  143.3, 131.1, 129.8, 119.1, 83.1, 29.3, 24.7 ppm.  $^{11}\text{B}\{^1\text{H}\}$  NMR (128 MHz,  $\text{CDCl}_3$ ):  $\delta_{\text{B}}$  34.0 ppm.

### 4,4,5,5-tetramethyl-2-(2-(perfluorophenyl)ethyl)-1,3,2-dioxaborolane (2f). <sup>1</sup>

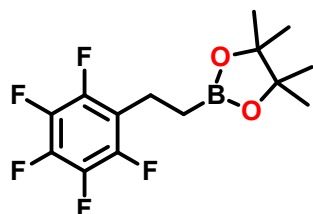

Yield: [Mass in 332.08 mg (100%), Mass out 265.66 mg (80%)].  $^1\text{H}$  NMR (400 MHz,  $\text{CDCl}_3$ ):  $\delta_{\text{H}}$  2.80 - 2.75 (m, 2H,  $\text{CH}_2$ ), 1.22 (s, 12H,  $\text{CH}_3$ ), 1.11 - 1.06 (m, 2H,  $\text{CH}_2$ ) ppm.  $^{13}\text{C}\{^1\text{H}\}$  NMR (100 MHz,  $\text{CDCl}_3$ ):  $\delta_{\text{C}}$  146.2 - 146.0 (m, CF), 143.7-143.6 (m, CF), 140.5 - 140.4 (m, CF), 138.5 - 138.0 (m, CF), 127.3 - 116.9 (m, CF), 83.4, 24.7, 16.9 ppm.  $^{11}\text{B}\{^1\text{H}\}$  NMR (128 MHz,  $\text{CDCl}_3$ ):  $\delta_{\text{B}}$  33.2 ppm

### 2-(3-cyclohexylpropyl)-4,4,5,5-tetramethyl-1,3,2-dioxaborolane

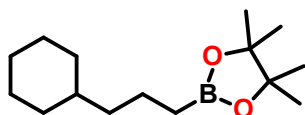

Yield: [Mass in 252.20 mg (100%), Mass out 214.37 mg (85%)] :  $\delta_{\text{H}}$  1.69 - 1.63 (m, 6H,  $\text{CH}_2$ ), 1.41 - 1.37 (m, 2H,  $\text{CH}_2$ ), 1.22 (s, 12H,  $\text{CH}_3$ ), 1.17 - 1.12 (m, 5H,  $\text{CH}_2$ ), 0.88 - 0.81 (m, 2H,  $\text{CH}_2$ ), 0.72 (t,  $J = 8.0$  Hz, 2H,  $\text{CH}_2$ ) ppm.  $^{13}\text{C}\{^1\text{H}\}$  NMR (100 MHz,  $\text{CDCl}_3$ ):  $\delta_{\text{C}}$  82.7, 40.4, 37.4, 33.3, 26.7, 26.4, 24.7, 21.2 ppm.  $^{11}\text{B}\{^1\text{H}\}$  NMR (128 MHz,  $\text{CDCl}_3$ ):  $\delta_{\text{B}}$  34.1 ppm.

**2-(2-cyclohexylethyl)-4,4,5,5-tetramethyl-1,3,2-dioxaborolane(2h).<sup>2</sup>**

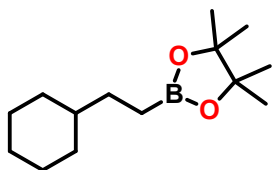

Yield: [Mass in 238.17 mg (100%), Mass out 197.68 mg (83%)]:  $\delta_{\text{H}}$  1.69 - 1.59 (m, 4H,  $\text{CH}_2$ ), 1.43 - 1.35 (m, 1H,  $\text{CH}$ ), 1.22 (s, 12H,  $\text{CH}_3$ ), 1.17 - 1.12 (m, 4H,  $\text{CH}_2$ ), 0.88 - 0.81 (m, 2H,  $\text{CH}_2$ ), 0.72 (t,  $J = 8.0$  Hz, 2H,  $\text{CH}_2$ ) ppm.  $^{13}\text{C}\{^1\text{H}\}$  NMR (100 MHz,  $\text{CDCl}_3$ ):  $\delta_{\text{C}}$  82.7, 40.4, 37.4, 33.4, 26.5 (d,  $J = 33.0$  Hz), 21.2 ppm.  $^{11}\text{B}\{^1\text{H}\}$  NMR (128 MHz,  $\text{CDCl}_3$ ):  $\delta_{\text{B}}$  34.2 ppm.

**2-(2-cyclopentylethyl)-4,4,5,5-tetramethyl-1,3,2-dioxaborolane (2i).**

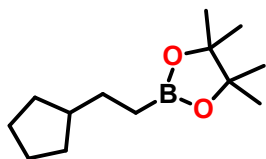

Yield: [Mass in 224.15 mg (100%), Mass out 190.52 mg (85%)].  $^1\text{H}$  NMR (400 MHz,  $\text{CDCl}_3$ ):  $\delta_{\text{H}}$  1.74 - 1.65 (m, 3H,  $\text{CH}_2$ ), 1.58 - 1.51 (m, 2H,  $\text{CH}_2$ ), 1.49 - 1.44 (m, 1H,  $\text{CH}$ ), 1.39 (q,  $J = 8.0$  Hz, 2H,  $\text{CH}_2$ ), 1.23 (s, 12H,  $\text{CH}_3$ ), 1.10 - 1.03 (m, 2H,  $\text{CH}_2$ ), 0.76 (t,  $J = 8.0$  Hz, 2H,  $\text{CH}_2$ ) ppm.  $^{13}\text{C}\{^1\text{H}\}$  NMR (100 MHz,  $\text{CDCl}_3$ ):  $\delta_{\text{C}}$  82.8, 42.6, 32.3, 30.1, 25.2, 24.7 ppm.  $^{11}\text{B}\{^1\text{H}\}$  NMR (128 MHz,  $\text{CDCl}_3$ ):  $\delta_{\text{B}}$  33.1 ppm

**4,4,5,5-tetramethyl-2-octyl-1,3,2-dioxaborolane (2j).**

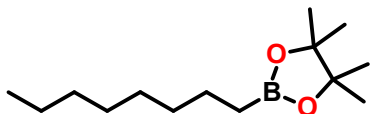

Yield: [Mass in 240.19 mg (100%), Mass out 216.17 mg (90%)].  $^1\text{H}$  NMR (400 MHz,  $\text{CDCl}_3$ ):  $\delta_{\text{H}}$  1.39 - 1.34 (m, 2H,  $\text{CH}_2$ ), 1.27 - 1.24 (m, 10H,  $\text{CH}_2$ ), 1.22 (s, 12H,  $\text{CH}_3$ ), 0.85 (t,  $J = 8.0$  Hz,

2H, CH<sub>3</sub>), 0.74 (t, *J* = 8.0 Hz, 2H, CH<sub>2</sub>) ppm. <sup>13</sup>C{<sup>1</sup>H} NMR (100 MHz, CDCl<sub>3</sub>): δ<sub>C</sub> 82.7, 32.4, 31.8, 29.3 (d, *J* = 13.0 Hz), 24.7, 23.9, 22.6, 14.0 ppm. <sup>11</sup>B{<sup>1</sup>H} NMR (128 MHz, CDCl<sub>3</sub>): δ<sub>B</sub> 34.1 ppm.

**2-(5-bromopentyl)-4,4,5,5-tetramethyl-1,3,2-dioxaborolane (2k).**

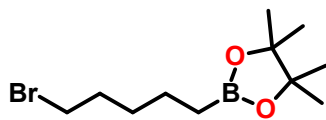

Yield: [Mass in 277.01 mg (100%), Mass out 249.30 mg (90%)]. <sup>1</sup>H NMR (400 MHz, CDCl<sub>3</sub>): δ<sub>H</sub> 3.40 (t, *J* = 8.0 Hz, 2H, CH<sub>2</sub>), 1.85 (t, *J* = 8.0 Hz, 2H, CH<sub>2</sub>), 1.45 - 1.41 (q, 4H, CH<sub>2</sub>), 1.24 (s, 12H, CH<sub>3</sub>), 0.78 (t, *J* = 8.0 Hz, 2H, CH<sub>2</sub>) ppm. <sup>13</sup>C{<sup>1</sup>H} NMR (100 MHz, CDCl<sub>3</sub>): δ<sub>C</sub> 83.0 (d, *J* = 15.0 Hz), 33.9, 32.6, 30.8, 24.7, 23.1 ppm. <sup>11</sup>B{<sup>1</sup>H} NMR (128 MHz, CDCl<sub>3</sub>): δ<sub>B</sub> 33.3 ppm.

**2-(6-bromohexyl)-4,4,5,5-tetramethyl-1,3,2-dioxaborolane (2l)**

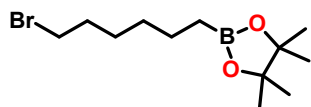

Yield: [Mass in 291.03 mg (100%), Mass out 261.92 mg (90%)]. <sup>1</sup>H NMR (400 MHz, CDCl<sub>3</sub>): δ<sub>H</sub> 3.38 (t, *J* = 8.0 Hz, 2H, CH<sub>2</sub>), 1.87 - 1.80 (q, 2H, CH<sub>2</sub>), 1.45 - 1.37 (m, 4H, CH<sub>2</sub>), 1.33 - 1.28 (m, 2H, CH<sub>2</sub>), 1.23 (s, 12H, CH<sub>3</sub>), 0.76 (t, *J* = 8.0 Hz, 2H, CH<sub>2</sub>) ppm. <sup>13</sup>C{<sup>1</sup>H} NMR (100 MHz, CDCl<sub>3</sub>): δ<sub>C</sub> 82.8, 33.9, 32.6, 31.3, 27.8, 24.7, 23.7 ppm. <sup>11</sup>B{<sup>1</sup>H} NMR (128 MHz, CDCl<sub>3</sub>): δ<sub>B</sub> 34.4 ppm.

**2-(8-bromooctyl)-4,4,5,5-tetramethyl-1,3,2-dioxaborolane (2m).**

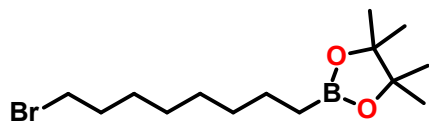

Yield: [Mass in 319.09 mg (100%), Mass out 280.79 mg (88%)]. <sup>1</sup>H NMR (400 MHz, CDCl<sub>3</sub>) δ<sub>H</sub> 3.37 (t, 2H), 1.84 - 1.80 (m, 2H), 1.39 - 1.36 (m, 4H), 1.29 - 1.27 (m, 6H), 1.22 (s, 12H), 0.74 (t, 2H) ppm. <sup>13</sup>C{<sup>1</sup>H} NMR (100 MHz, CDCl<sub>3</sub>) δ<sub>C</sub> 82.7, 33.9, 32.7, 32.1, 29.0, 28.5, 28.0, 24.7, 23.8 ppm. <sup>11</sup>B{<sup>1</sup>H} NMR (128 MHz, CDCl<sub>3</sub>) δ<sub>B</sub> 34.0 ppm.

**2-(2,3-dimethylbutyl)-4,4,5,5-tetramethyl-1,3,2-dioxaborolane (2n).**

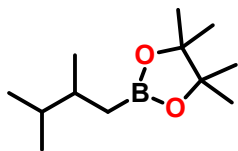

Yield: [Mass in 212.14 mg (100%), Mass out 190.92 mg (90%)].  $^1\text{H}$  NMR (400 MHz,  $\text{CDCl}_3$ )  $\delta_{\text{H}}$  71.58 - 1.53 (m, 1H), 1.47 - 1.42 (m, 1H), 1.22 (s, 12H), 0.83 - 0.78 (m, 10H), 0.61 - 0.55 (m, 1H) ppm.  $^{13}\text{C}$ ( $^1\text{H}$ ) NMR (100 MHz,  $\text{CDCl}_3$ )  $\delta_{\text{C}}$  82.7, 35.0, 34.1, 24.8, 24.6, 19.7, 18.6 ppm.  $^{11}\text{B}$ ( $^1\text{H}$ ) NMR (128 MHz,  $\text{CDCl}_3$ )  $\delta_{\text{B}}$  34.3 ppm.

**4-(2-(4,4,5,5-tetramethyl-1,3,2-dioxaborolan-2-yl)ethyl)phenyl acetate (2o).<sup>3</sup>**

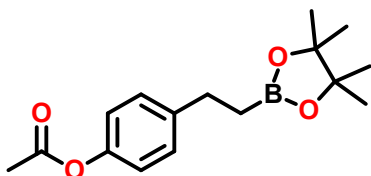

Yield: [Mass in 290.16 mg (100%), Mass out 261.14 mg (90%)].  $^1\text{H}$  NMR (400 MHz,  $\text{CDCl}_3$ )  $\delta_{\text{H}}$  7.21 (d, 2H), 6.96 (d, 2H), 2.74 (t, 2H), 2.27 (s, 3H), 1.21 (s, 12H), 1.13 (t, 2H) ppm.  $^{13}\text{C}$ ( $^1\text{H}$ ) NMR (100 MHz,  $\text{CDCl}_3$ )  $\delta_{\text{C}}$  169.6, 148.4, 141.8, 128.8, 121.0, 83.0, 29.2, 24.7, 21.0 ppm.  $^{11}\text{B}$ ( $^1\text{H}$ ) NMR (128 MHz,  $\text{CDCl}_3$ )  $\delta_{\text{B}}$  34.2 ppm.

**(E)-4,4,5,5-tetramethyl-2-styryl-1,3,2-dioxaborolane (3a).<sup>4</sup>**

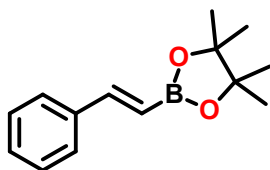

Yield: [Mass in 230.11 mg (100%), Mass out 227.8 mg (99%)].  $^1\text{H}$  NMR (400 MHz,  $\text{CDCl}_3$ ):  $\delta_{\text{H}}$  7.42 - 7.40 (m, 2H), 7.36 (d, 1H,  $J = 16$  Hz), 7.25 - 7.20 (m, 3H), 6.10 (d, 1H,  $J = 16$  Hz), 1.24 (s, 12H,  $\text{CH}_3$ , Bpin) ppm.  $^{13}\text{C}$ { $^1\text{H}$ } NMR (100 MHz,  $\text{CDCl}_3$ ):  $\delta_{\text{C}}$  148.0, 133.5, 131.7, 131.6, 128.5, 122.9, 83.4, 24.5 ppm.  $^{11}\text{B}$ { $^1\text{H}$ } NMR (128.3 MHz,  $\text{CDCl}_3$ ):  $\delta_{\text{B}}$  30.4 (C-Bpin) ppm.

**(E)-4,4,5,5-tetramethyl-2-(4-methylstyryl)-1,3,2-dioxaborolane (3b).<sup>4</sup>**

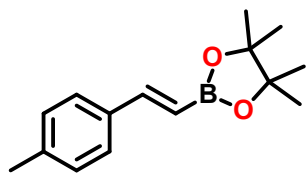

Yield: [Mass in 244.14 mg (100%), Mass out 239.3 mg (98%)].  $^1\text{H}$  NMR (400 MHz,  $\text{CDCl}_3$ )  $\delta_{\text{H}}$  7.42 - 7.37 (m, 3H), 7.15 (d,  $J = 8$  Hz, 2H), 6.13 (d,  $J = 20.0$  Hz, 1H), 2.35 (s, 3H), 1.32 (s, 12H) ppm.  $^{13}\text{C}\{^1\text{H}\}$  NMR (100 MHz,  $\text{CDCl}_3$ )  $\delta_{\text{C}}$  149.5, 138.9, 134.8, 132.0, 129.3, 127.0, 83.2, 24.8, 21.3 ppm.  $^{11}\text{B}\{^1\text{H}\}$  NMR (128.3 MHz,  $\text{CDCl}_3$ )  $\delta_{\text{B}}$  29.9 ppm.

**(E)-2-(4-methoxystyryl)-4,4,5,5-tetramethyl-1,3,2-dioxaborolane (3c).** <sup>4</sup>

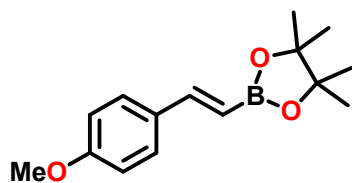

Yield: [Mass in 260.2 mg (100%), Mass out 206 mg (82%)].  $^1\text{H}$  NMR (400 MHz,  $\text{CDCl}_3$ )  $\delta_{\text{H}}$  7.36 (d,  $J = 8$  Hz, 2H), 7.33 (d,  $J = 20$  Hz, 1H), 6.77 (d,  $J = 8$  Hz, 2H), 5.95 (d,  $J = 20$  Hz, 1H), 3.68 (s, 3H), 1.22 (s, 12H) ppm.  $^{13}\text{C}\{^1\text{H}\}$  NMR (100 MHz,  $\text{CDCl}_3$ )  $\delta_{\text{C}}$  160.3, 149.1, 133.5, 129.0, 128.4, 114.0, 83.2, 55.2, 24.8 ppm.  $^{11}\text{B}\{^1\text{H}\}$  NMR (128.3 MHz,  $\text{CDCl}_3$ ):  $\delta_{\text{B}}$  29.9(C-Bpin) ppm.

**(E)-2-(4-chlorostyryl)-4,4,5,5-tetramethyl-1,3,2-dioxaborolane (3e).** <sup>4</sup>

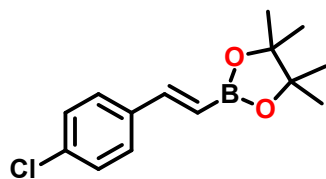

Yield: [Mass in 309.1 mg (100%), Mass out 302.9 mg (98%)].  $^1\text{H}$  NMR (400 MHz,  $\text{CDCl}_3$ ):  $\delta_{\text{H}}$  7.48 - 7.44 (m, 2H, ArH), 7.36 (d, 1H,  $J = 20$  Hz), 7.04 - 7.00 (m, 2H, ArH), 6.07 (d, 1H,  $J = 20$  Hz), 1.31 (s, 12H,  $\text{CH}_3$ , Bpin) ppm.  $^{13}\text{C}\{^1\text{H}\}$  NMR (100 MHz,  $\text{CDCl}_3$ ):  $\delta_{\text{C}}$  164.3, 161.9, 148.1, 133.7, 128.7, 115.6, 83.4, 24.8 ppm.  $^{11}\text{B}\{^1\text{H}\}$  NMR (128.3 MHz,  $\text{CDCl}_3$ ):  $\delta_{\text{B}}$  29.7 (C-Bpin) ppm.

**(E)-2-(4-bromostyryl)-4,4,5,5-tetramethyl-1,3,2-dioxaborolane (3e).** <sup>4</sup>

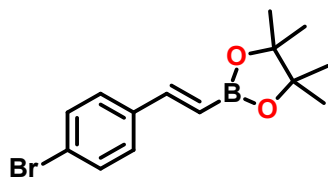

Yield: [Mass in 309.1 mg (100%), Mass out 302.9 mg (98%)].  $^1\text{H}$  NMR (400 MHz,  $\text{CDCl}_3$ ):  $\delta_{\text{H}}$  7.46 - 7.44 (m, 2H, ArH), 7.35 - 7.30 (m, 3H, ArH), 6.15 (d, 1H,  $J = 20$  Hz), 1.31 (s, 12H,  $\text{CH}_3$ , Bpin) ppm.  $^{13}\text{C}\{^1\text{H}\}$  NMR (100 MHz,  $\text{CDCl}_3$ ):  $\delta_{\text{C}}$  160.3, 149.1, 133.5, 129.0, 128.4, 113.9, 83.2, 24.8 ppm.  $^{11}\text{B}\{^1\text{H}\}$  NMR (128.3 MHz,  $\text{CDCl}_3$ ):  $\delta_{\text{B}}$  29.8 (C-Bpin) ppm.

**(E)-2-(2-cyclohexylvinyl)-4,4,5,5-tetramethyl-1,3,2-dioxaborolane (3f).** <sup>4</sup>

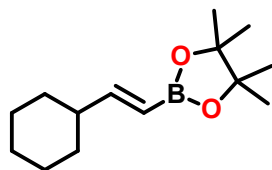

Yield: [Mass in 236.2 mg (100%), Mass out 229.11 mg (97%)].  $^1\text{H}$  NMR (400 MHz,  $\text{CDCl}_3$ ):  $\delta_{\text{H}}$  6.59 (dd, 1H,  $J_{\text{HH}} = 12$  Hz, 8 Hz), 5.38 (d, 1H,  $J = 20$  Hz), 2.03 - 2.01 (m, 1H), 1.75 - 1.71 (m, 6H), 1.27 (s, 12H,  $\text{CH}_3$ , Bpin) 1.25 - 1.03 (m, 4H), ppm.  $^{13}\text{C}\{^1\text{H}\}$  NMR (100 MHz,  $\text{CDCl}_3$ ):  $\delta_{\text{C}}$  159.8, 82.9, 43.2, 31.9, 26.1, 25.9, 24.7, 24.5 ppm.  $^{11}\text{B}\{^1\text{H}\}$  NMR (128.3 MHz,  $\text{CDCl}_3$ ):  $\delta_{\text{B}}$  30.4 (C-Bpin) ppm.

**(E)-2-(2-cyclopentylvinyl)-4,4,5,5-tetramethyl-1,3,2-dioxaborolane (3g).** <sup>4</sup>

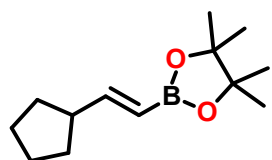

Yield: [Mass in 222.13 mg (100%), Mass out 211.02 mg (95%)].  $^1\text{H}$  NMR (400 MHz,  $\text{CDCl}_3$ ):  $\delta_{\text{H}}$  6.63 (dd, 1H,  $J_{\text{HH}} = 12$  Hz, 8 Hz), 5.42 (d, 1H,  $J = 20$  Hz), 2.56 - 2.54 (m, 1H), 1.81 - 1.65 (m, 6H), 1.59 - 1.39 (m, 2H), 1.23 (s, 12H,  $\text{CH}_3$ , Bpin) ppm.  $^{13}\text{C}\{^1\text{H}\}$  NMR (100 MHz,  $\text{CDCl}_3$ ):  $\delta_{\text{C}}$  158.9, 82.9, 46.1, 32.3, 25.4, 24.7, 24.5 ppm.  $^{11}\text{B}\{^1\text{H}\}$  NMR (128.3 MHz,  $\text{CDCl}_3$ ):  $\delta_{\text{B}}$  30.6 (C-Bpin) ppm.

**(E)-4,4,5,5-tetramethyl-2-(2-(thiophen-3-yl)vinyl)-1,3,2-dioxaborolane (3h).** <sup>4</sup>

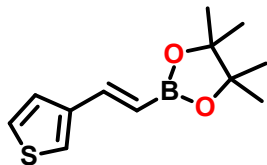

Yield: [Mass in 236.14 mg (100%), Mass out 233.78 mg (99%)].  $^1\text{H}$  NMR (400 MHz,  $\text{CDCl}_3$ ):  $\delta_{\text{H}}$  7.305 (d,  $J=20$ , 1H), 7.28 – 7.27 (m, 2H, ArH), 7.24 – 7.24 (m, 1H, ArH), 5.93 (d,  $J = 20$  Hz, 1H), 1.28 (s, 12H,  $\text{CH}_3$ , Bpin) ppm.  $^{13}\text{C}\{-^1\text{H}\}$  NMR (100 MHz,  $\text{CDCl}_3$ ):  $\delta_{\text{C}}$  143.0, 141.1, 126.0, 124.9 83.2, 24.7 ppm.  $^{11}\text{B}\{^1\text{H}\}$  NMR (128.3 MHz,  $\text{CDCl}_3$ ):  $\delta_{\text{B}}$  29.6 (C-Bpin) ppm.

**(E)-2-(5-chloropent-1-en-1-yl)-4,4,5,5-tetramethyl-1,3,2-dioxaborolane (2j).**

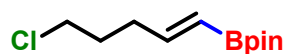

The compound was isolated as a colourless oil. Yield: [Mass in 230.12 mg (100%), Mass out 227.82 mg (99%)].  $^1\text{H}$  NMR (400 MHz,  $\text{CDCl}_3$ ):  $\delta_{\text{H}}$  6.61 - 6.53 (m, 1H), 5.48 (d, 1H,  $J = 20$  Hz), 3.52 (t, 2H,  $J = 8$  Hz), 2.34 - 2.27 (m, 2H), 1.92 - 1.85 (m, 2H), 1.25 (s, 12H,  $\text{CH}_3$ , Bpin) ppm.  $^{13}\text{C}\{^1\text{H}\}$  NMR (100 MHz,  $\text{CDCl}_3$ ):  $\delta_{\text{C}}$  152.0, 83.0, 44.2, 32.6, 30.9, 24.5 ppm.  $^{11}\text{B}\{^1\text{H}\}$  NMR (128.3 MHz,  $\text{CDCl}_3$ ):  $\delta_{\text{B}}$  31.6 (C-Bpin) ppm.

**(E)-trimethyl(2-(4,4,5,5-tetramethyl-1,3,2-dioxaborolan-2-yl)vinyl)silane (3j).<sup>4</sup>**

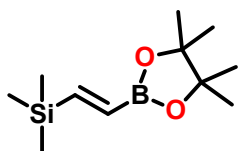

Yield: [Mass in 226.20 mg (100%), Mass out 205.9 mg (91%)].  $^1\text{H}$  NMR (400 MHz,  $\text{CDCl}_3$ ):  $\delta_{\text{H}}$  6.02 (d,  $J=8$  Hz, 1H), 5.84 (d, 4Hz, 1H), 1.27 (s, 12H,  $\text{CH}_3$ , Bpin), 0.07 (s, 9H,  $\text{SiMe}_3$ ) ppm.  $^{13}\text{C}\{^1\text{H}\}$  NMR (100 MHz,  $\text{CDCl}_3$ ):  $\delta_{\text{C}}$  157.8, 134.4, 83.0, 24.5, -1.88 ppm.  $^{11}\text{B}\{^1\text{H}\}$  NMR (128.3 MHz,  $\text{CDCl}_3$ ):  $\delta_{\text{B}}$  30.9 (C-Bpin) ppm.

**(E)-4-(2-(4,4,5,5-tetramethyl-1,3,2-dioxaborolan-2-yl)vinyl)phenyl acetate (3k).<sup>1</sup>**

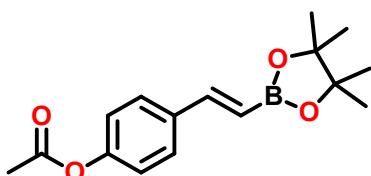

Yield: [Mass in 288.15 mg (100%), Mass out 273.75 mg (95%)].  $^1\text{H}$  NMR (400 MHz,  $\text{CDCl}_3$ ):  $\delta_{\text{H}}$  7.88 - 7.86 (m, 2H), 7.41 - 7.39 (m, 2H), 7.07 (d,  $J = 20$  Hz, 1H), 6.15 (d,  $J = 16$  Hz, 1H) 3.77 (s, 3H,  $\text{OCH}_3$ ), 1.18 (s, 12H,  $\text{CH}_3$ , Bpin) ppm.  $^{13}\text{C}\{^1\text{H}\}$  NMR (100 MHz,  $\text{CDCl}_3$ ):  $\delta_{\text{C}}$  166.7, 148.1, 141.7, 129.9, 129.0, 126.8, 125.2, 83.5, 52.0, 24.8 ppm.  $^{11}\text{B}\{^1\text{H}\}$  NMR (128.3 MHz,  $\text{CDCl}_3$ ):  $\delta_{\text{B}}$  29.5 (C-Bpin) ppm.

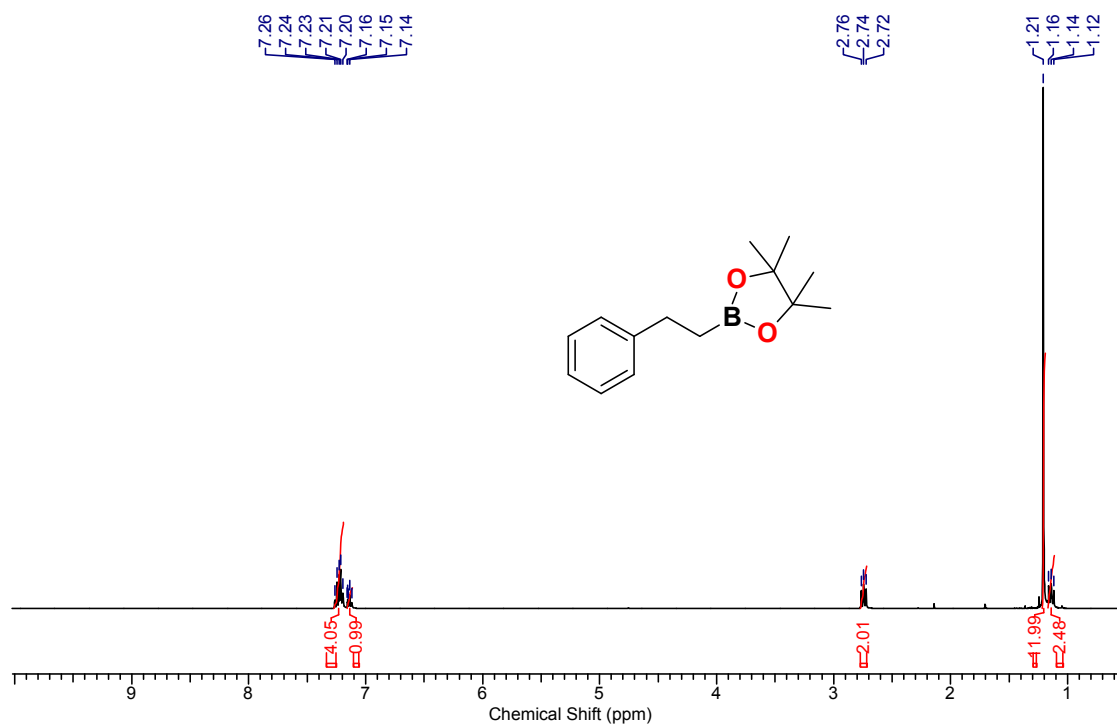

Figure FS4.  $^1\text{H}$  NMR (400 MHz,  $\text{CDCl}_3$ ) spectrum of **2a**.



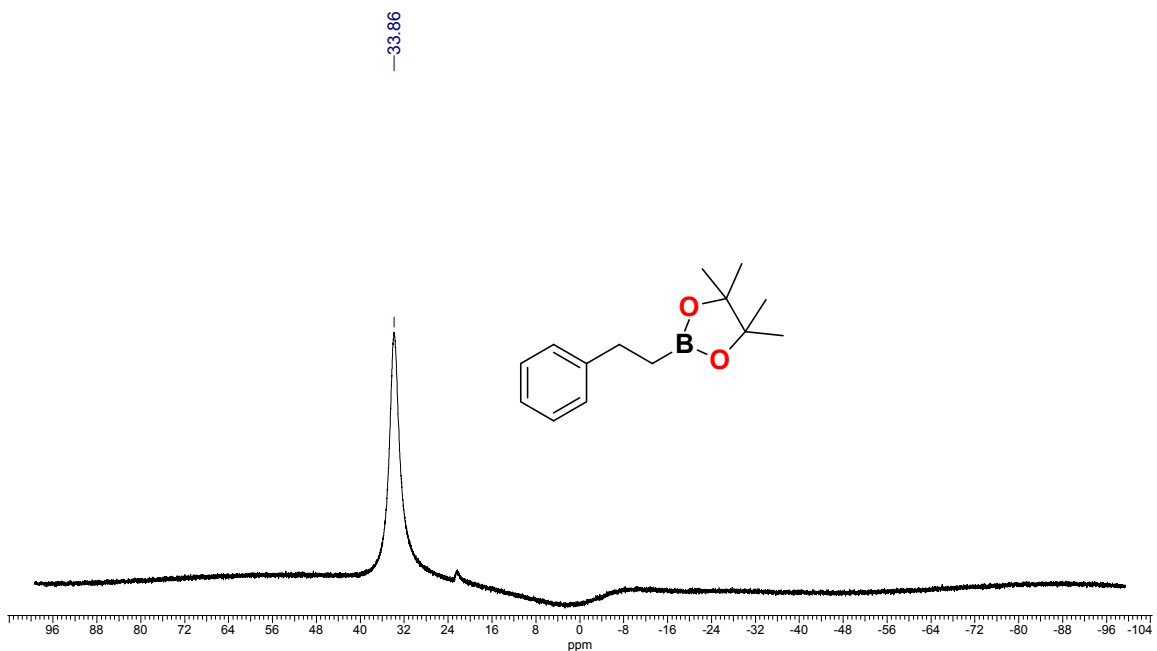

Figure FS5.  $^{11}\text{B}\{^1\text{H}\}$  NMR (128 MHz,  $\text{CDCl}_3$ ) spectrum of **2a**

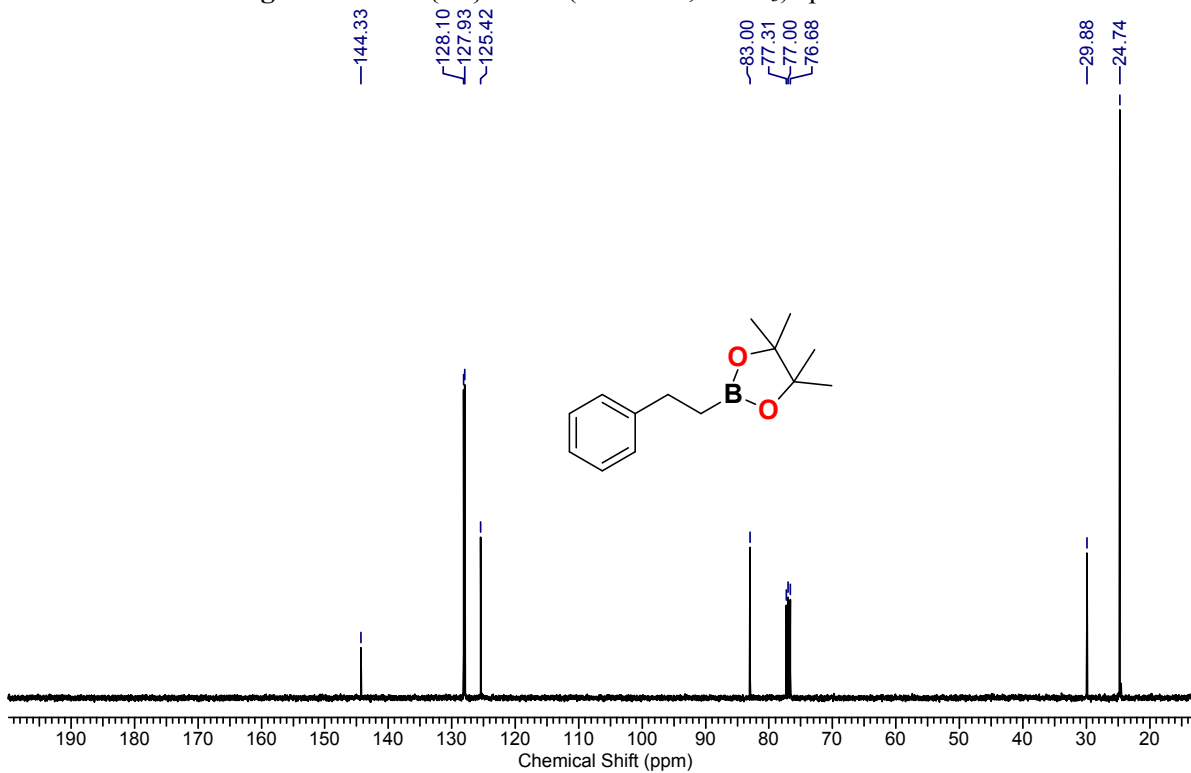

Figure FS6.  $^{13}\text{C}\{^1\text{H}\}$  NMR (100 MHz,  $\text{CDCl}_3$ ) spectrum of **2a**

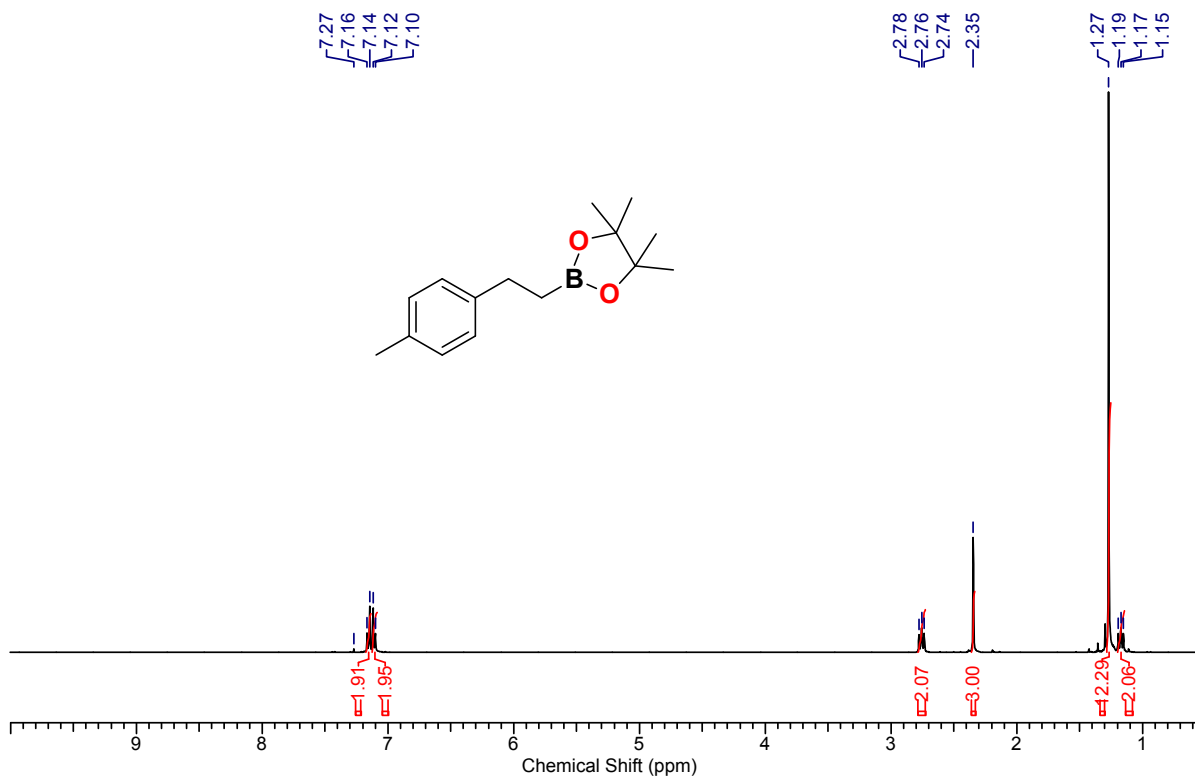

Figure FS7.  $^1\text{H}$  NMR (400 MHz,  $\text{CDCl}_3$ ) spectrum of **2b**.

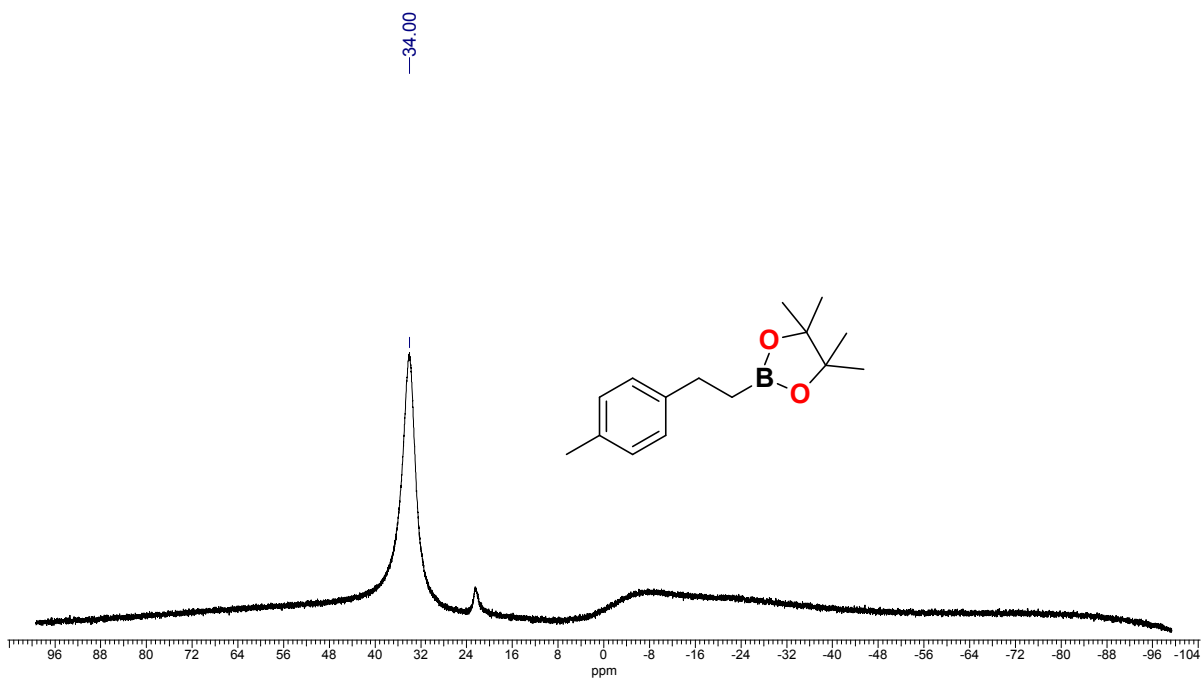

Figure FS8.  $^{11}\text{B}\{^1\text{H}\}$  NMR (128 MHz,  $\text{CDCl}_3$ ) spectrum of **2b**.

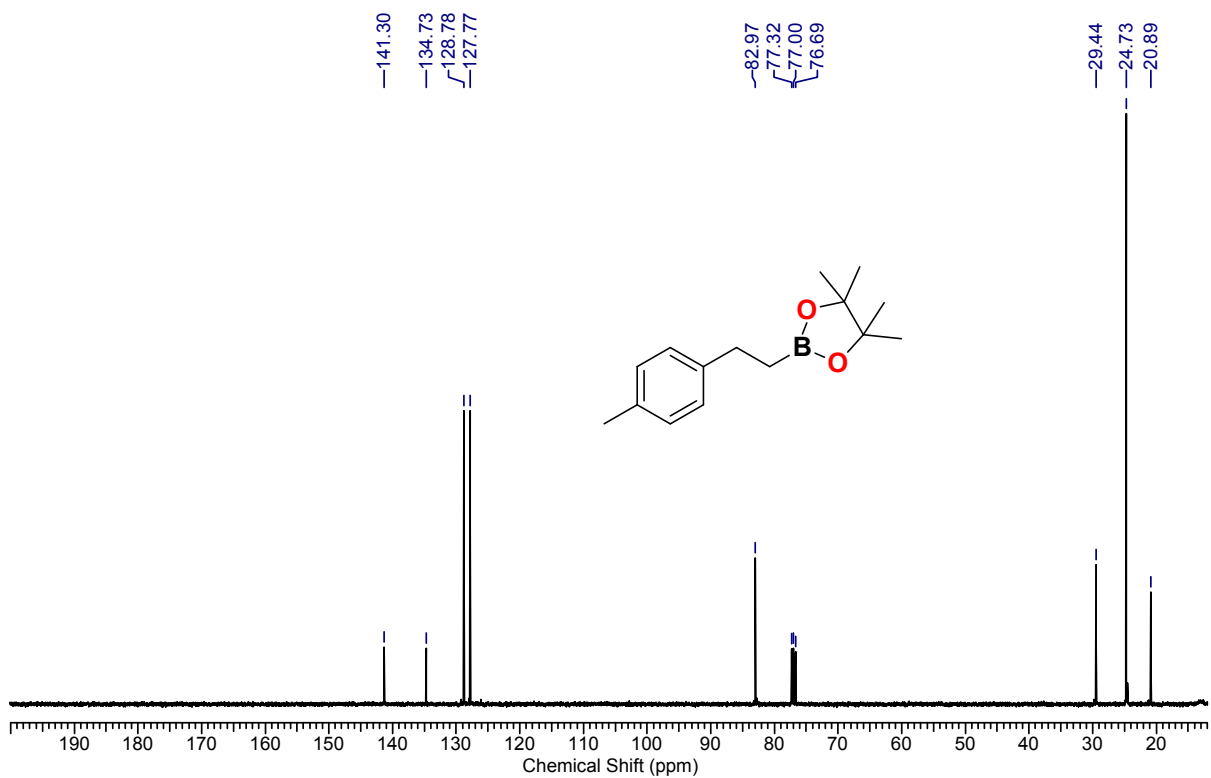

Figure FS9.  $^{13}\text{C}\{^1\text{H}\}$  NMR (100 MHz,  $\text{CDCl}_3$ ) spectrum of **2b**.

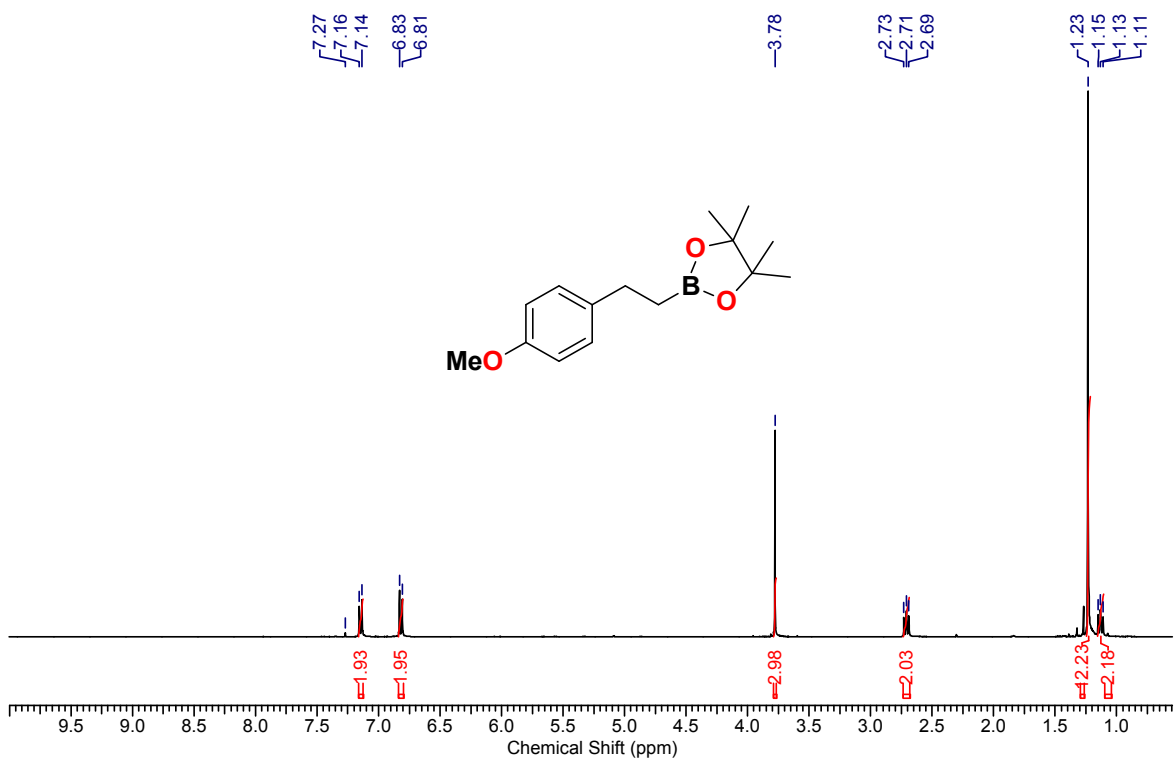

Figure FS10.  $^1\text{H}$  NMR (400 MHz,  $\text{CDCl}_3$ ) spectrum of **2c**.

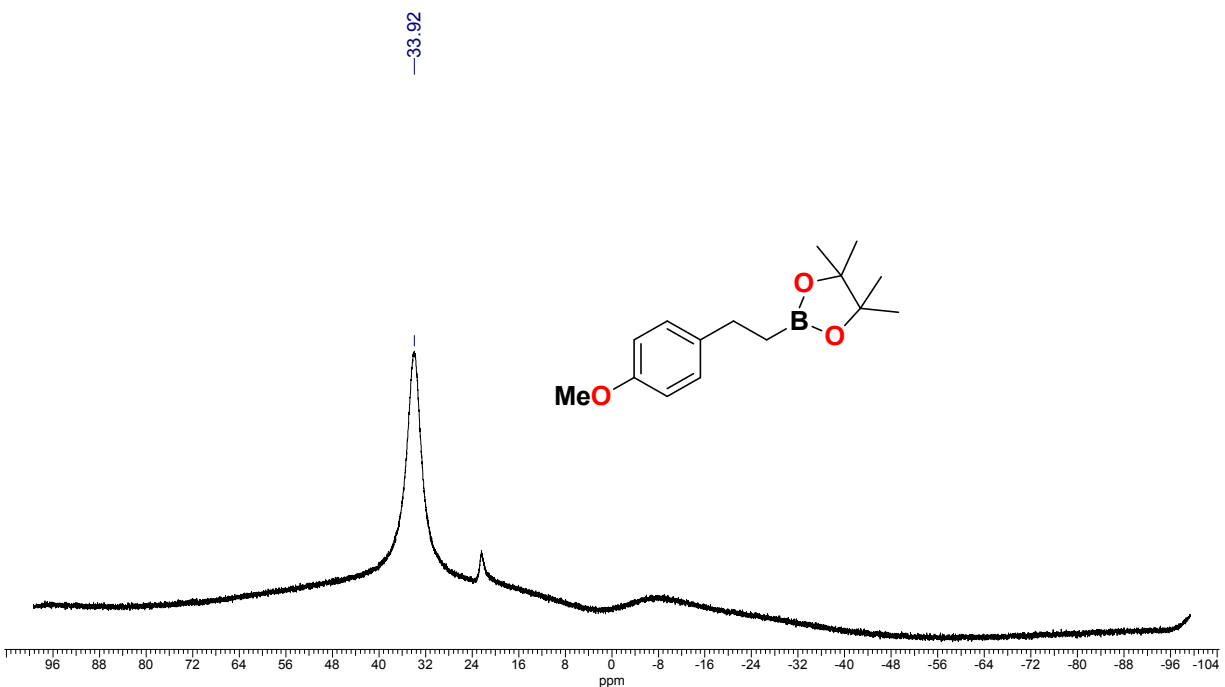

Figure FS11.  $^{11}\text{B}$   $\{^1\text{H}\}$  NMR (128 MHz,  $\text{CDCl}_3$ ) spectrum of 2c.

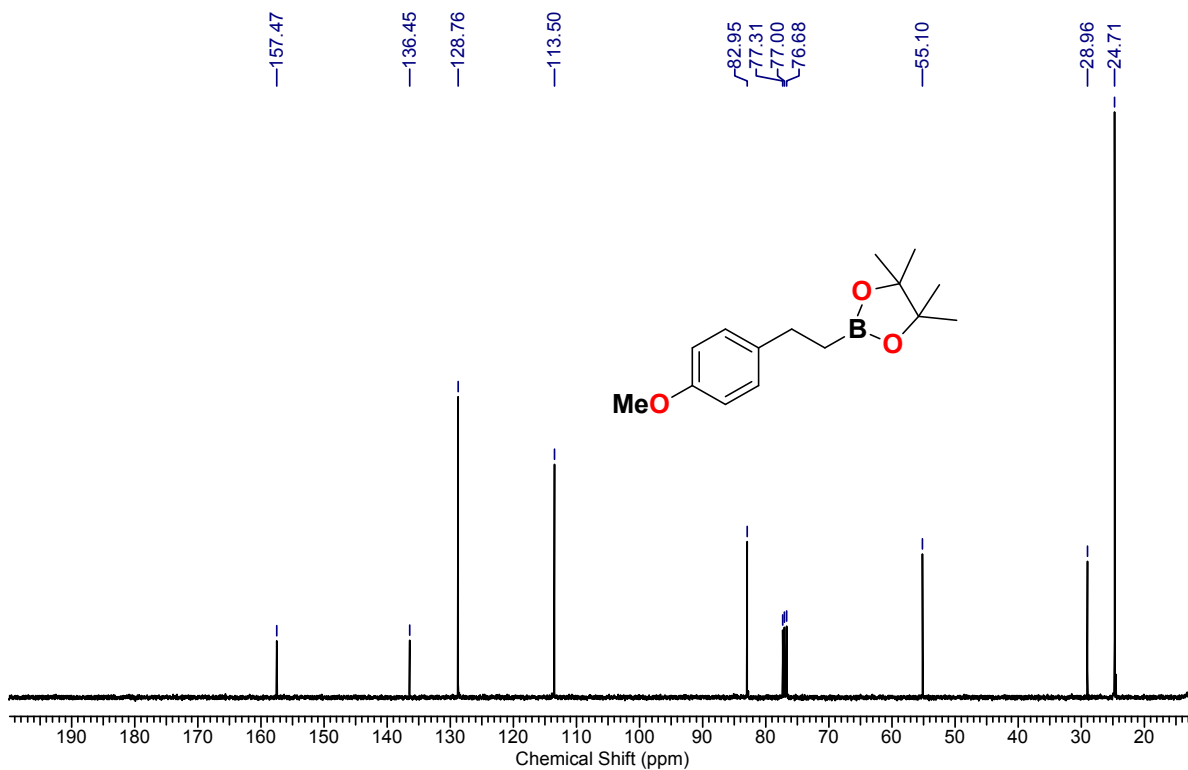

Figure FS12.  $^{13}\text{C}$   $\{^1\text{H}\}$  NMR (100 MHz,  $\text{CDCl}_3$ ) spectrum of 2c.

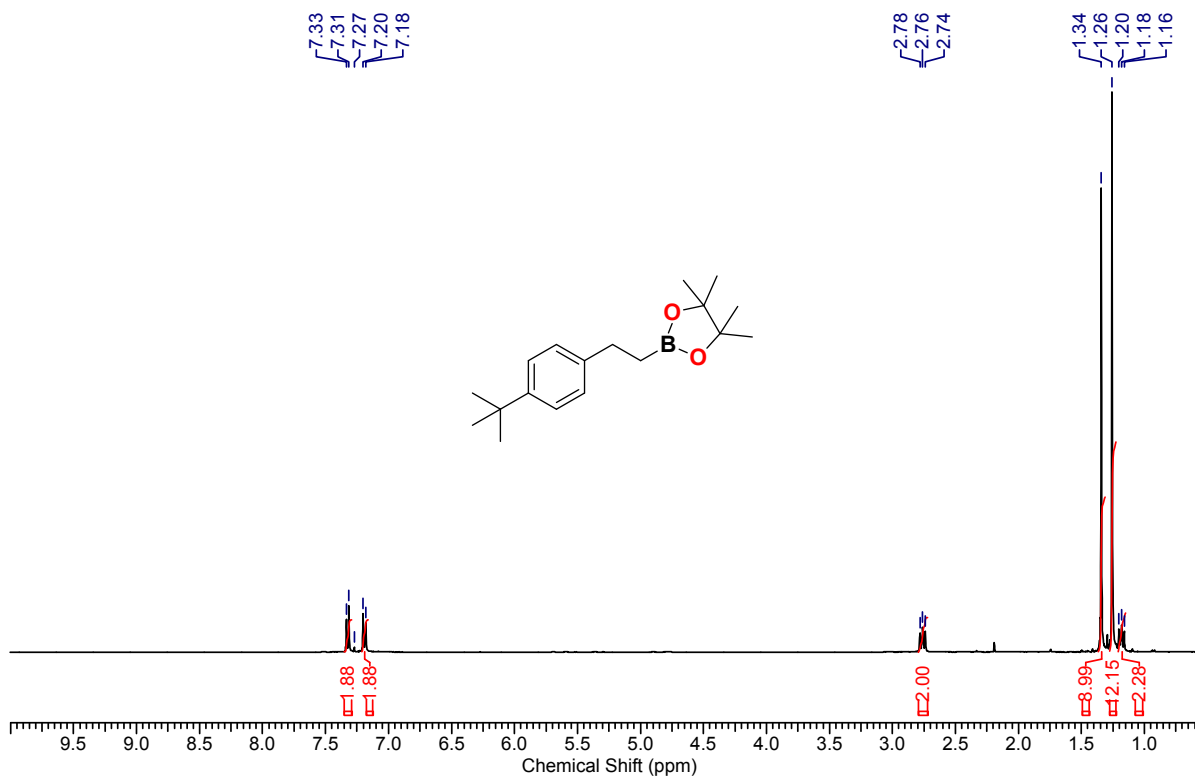

Figure FS13.  $^1\text{H}$  NMR (400 MHz,  $\text{CDCl}_3$ ) spectrum of **2d**.

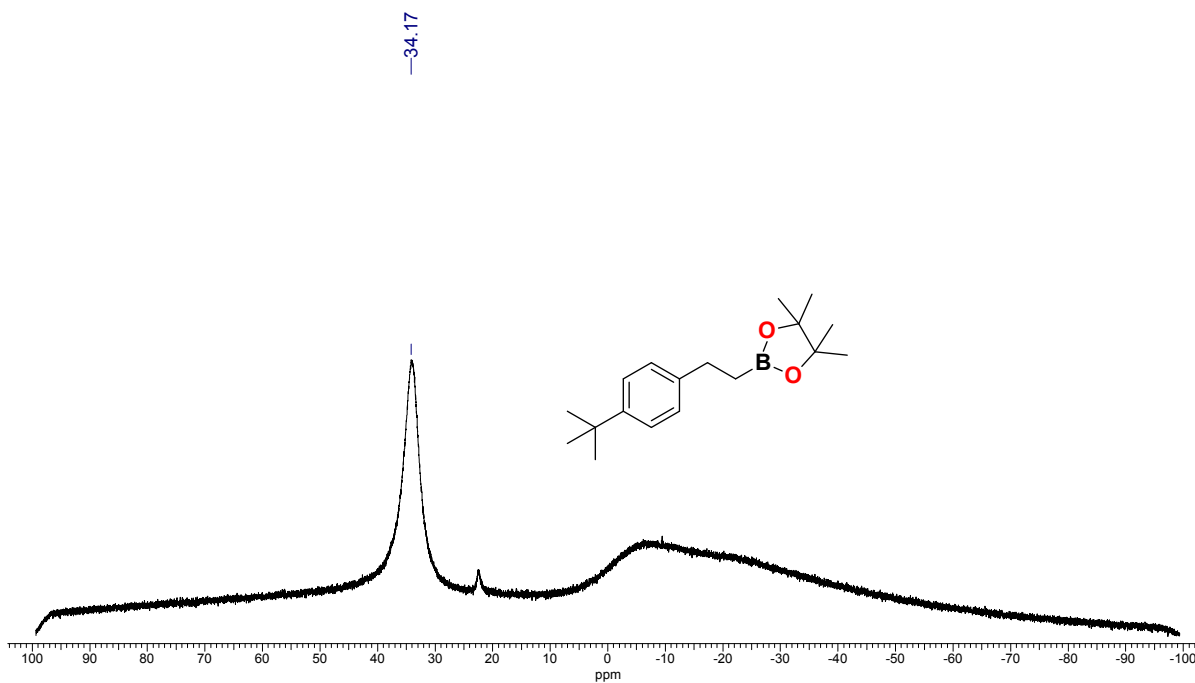

Figure FS14.  $^{11}\text{B}\{^1\text{H}\}$  NMR (128 MHz,  $\text{CDCl}_3$ ) spectrum of **2d**.

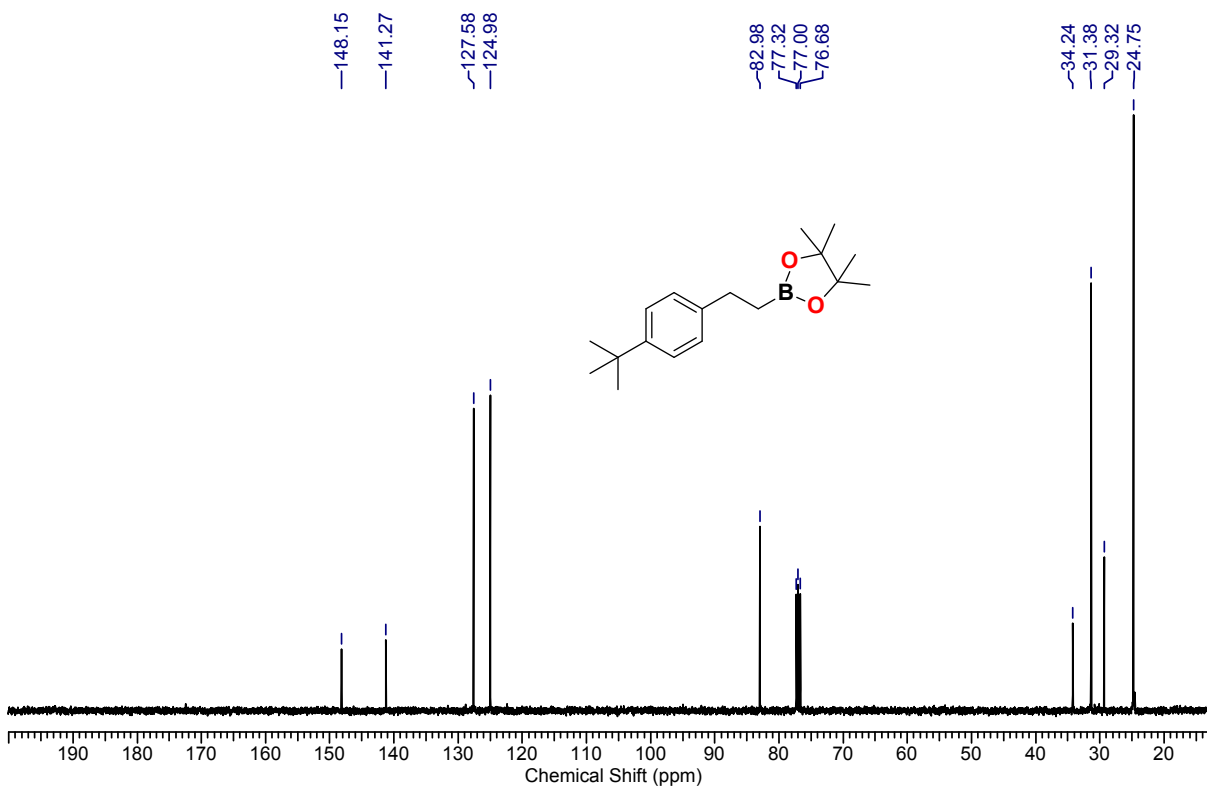

Figure FS15.  $^{13}\text{C}\{^1\text{H}\}$  NMR (100 MHz,  $\text{CDCl}_3$ ) spectrum of **2d**.

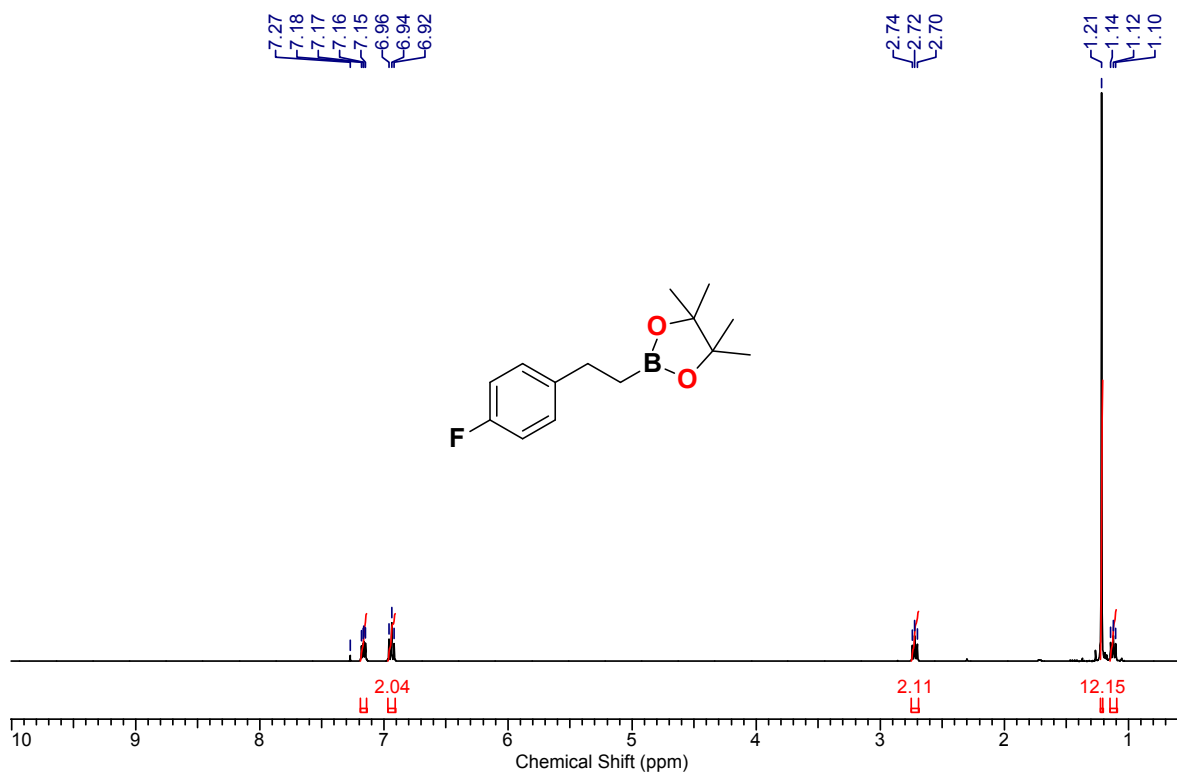

Figure FS16.  $^1\text{H}$  NMR (400 MHz,  $\text{CDCl}_3$ ) spectrum of **2e**.

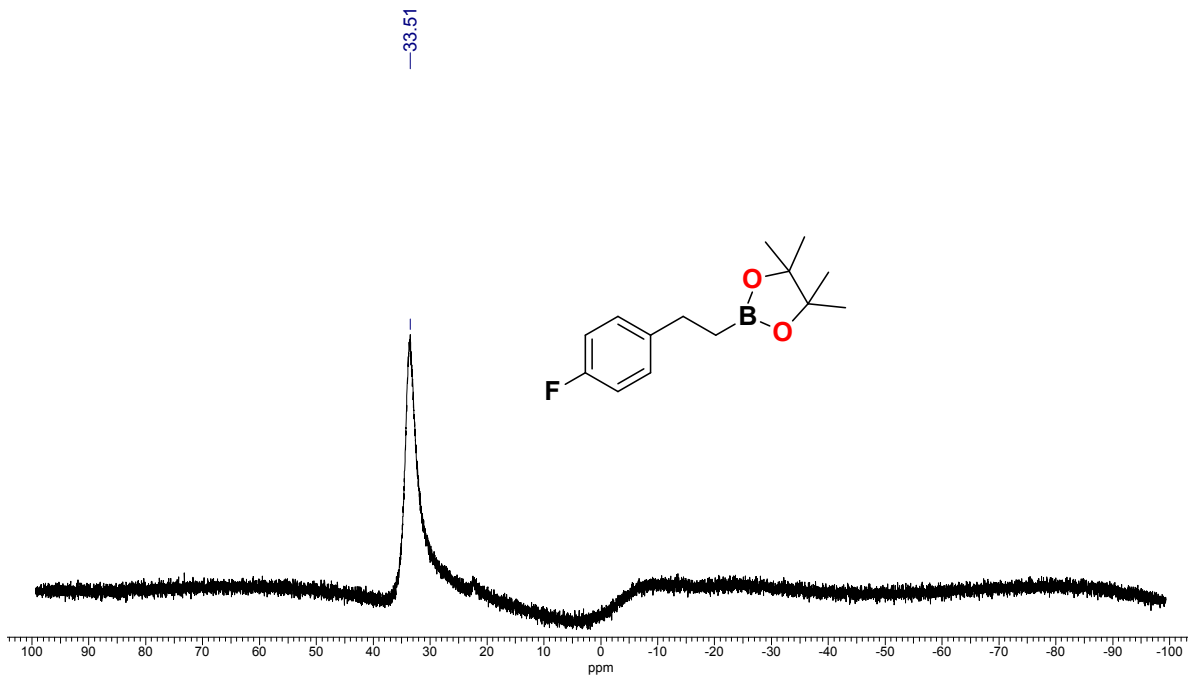

Figure FS17.  $^{11}\text{B}\{^1\text{H}\}$  NMR (128 MHz,  $\text{CDCl}_3$ ) spectrum of 2e.

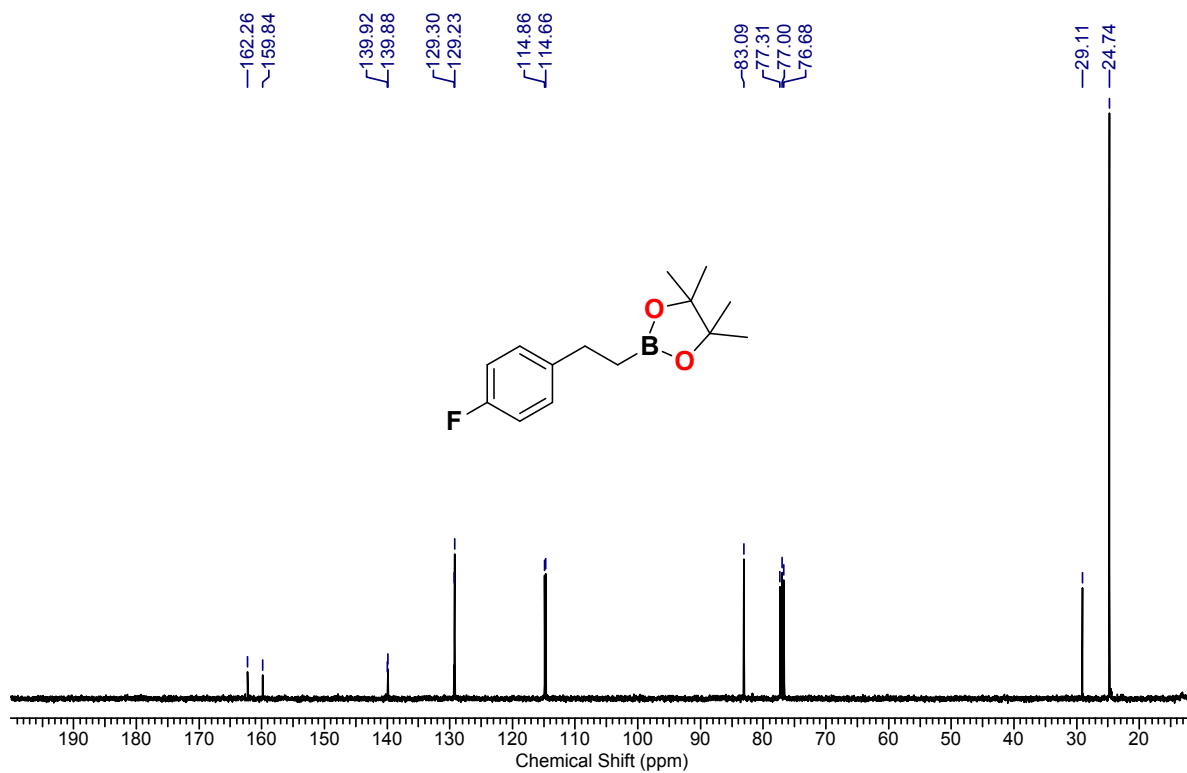

Figure FS18.  $^{13}\text{C}\{^1\text{H}\}$  NMR (100 MHz,  $\text{CDCl}_3$ ) spectrum of 2e.

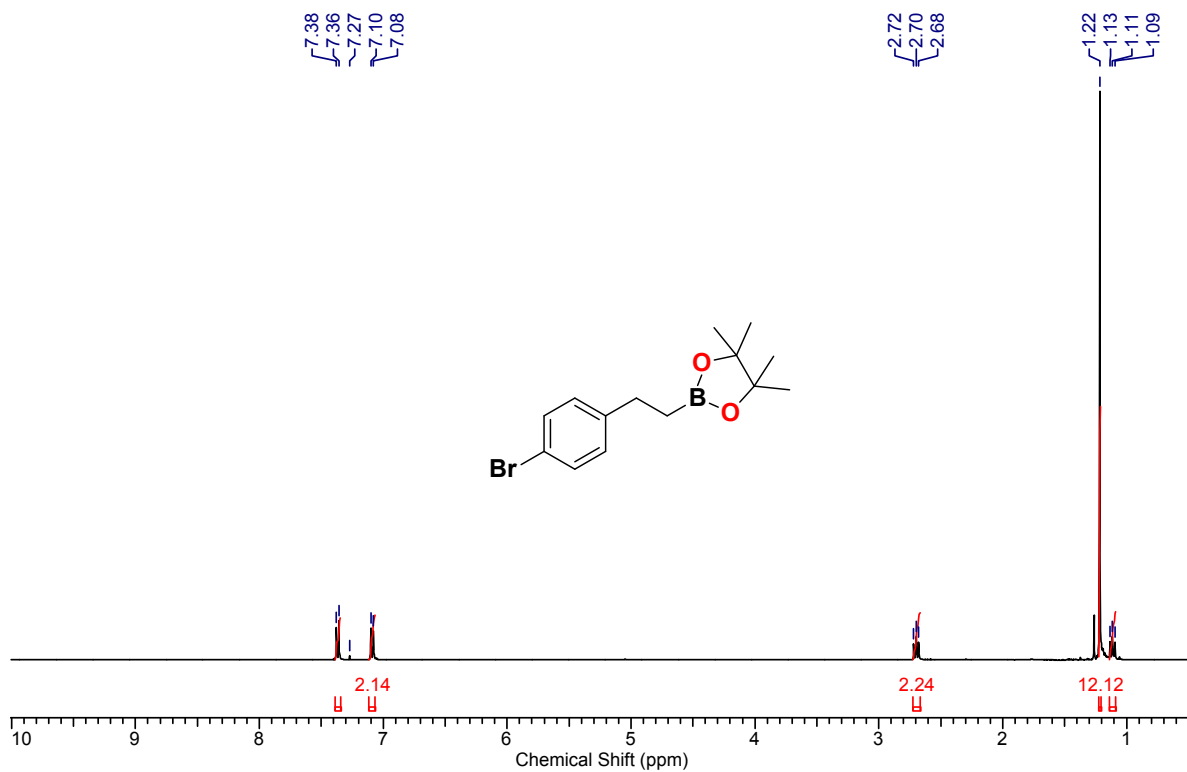

**Figure FS19.**  $^1\text{H}$  NMR (400 MHz,  $\text{CDCl}_3$ ) spectrum of **2f**.

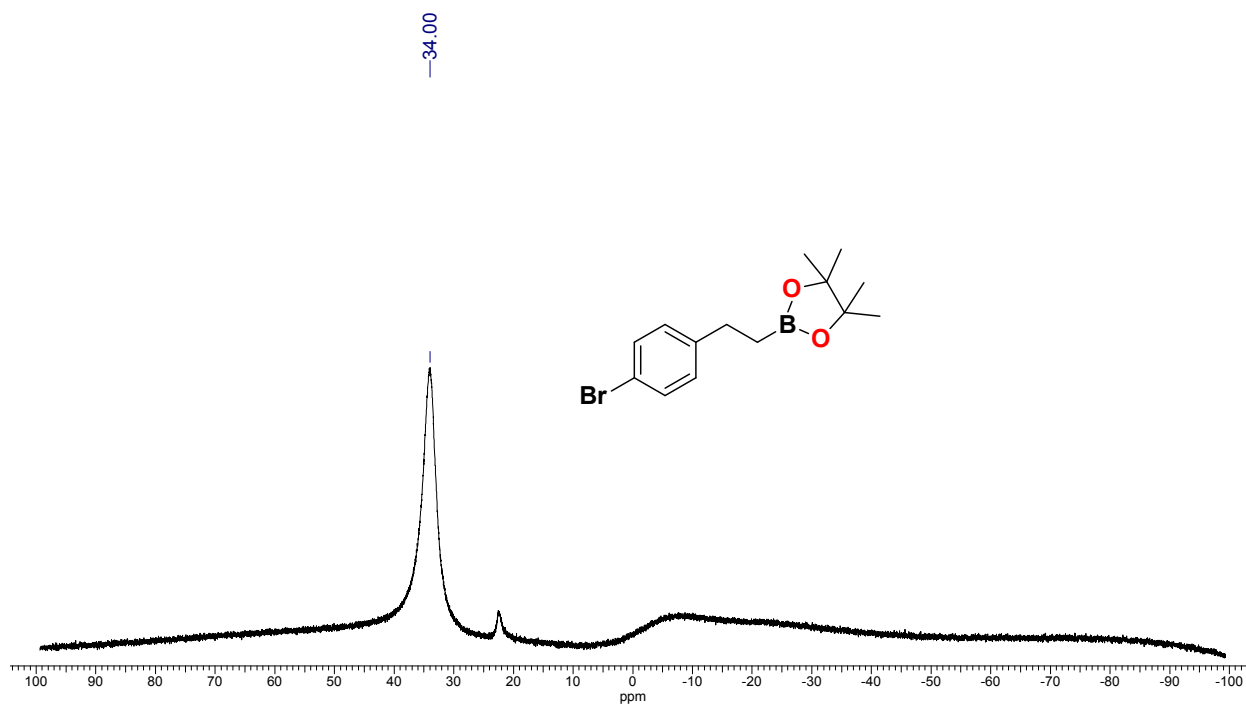

**Figure FS20.**  $^{11}\text{B}\{^1\text{H}\}$  NMR (128 MHz,  $\text{CDCl}_3$ ) spectrum of **2f**.



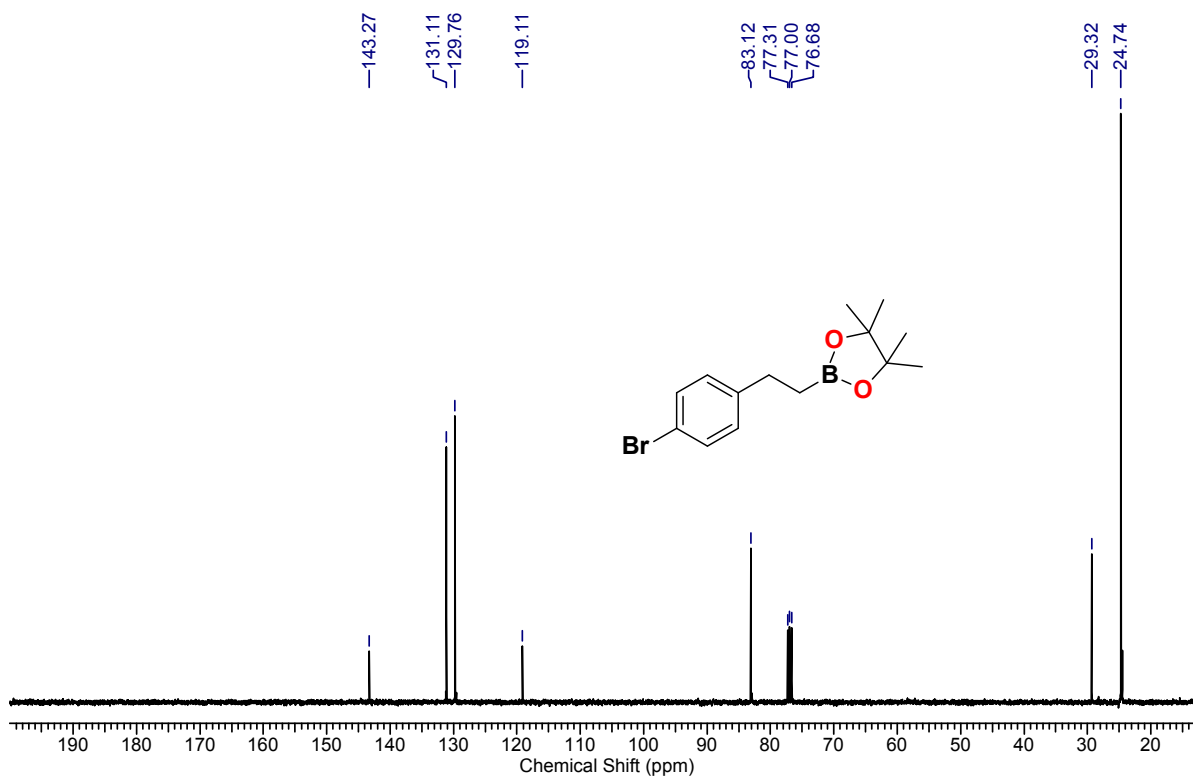

Figure FS21.  $^{13}\text{C}\{^1\text{H}\}$  NMR (100 MHz,  $\text{CDCl}_3$ ) spectrum of **2f**.

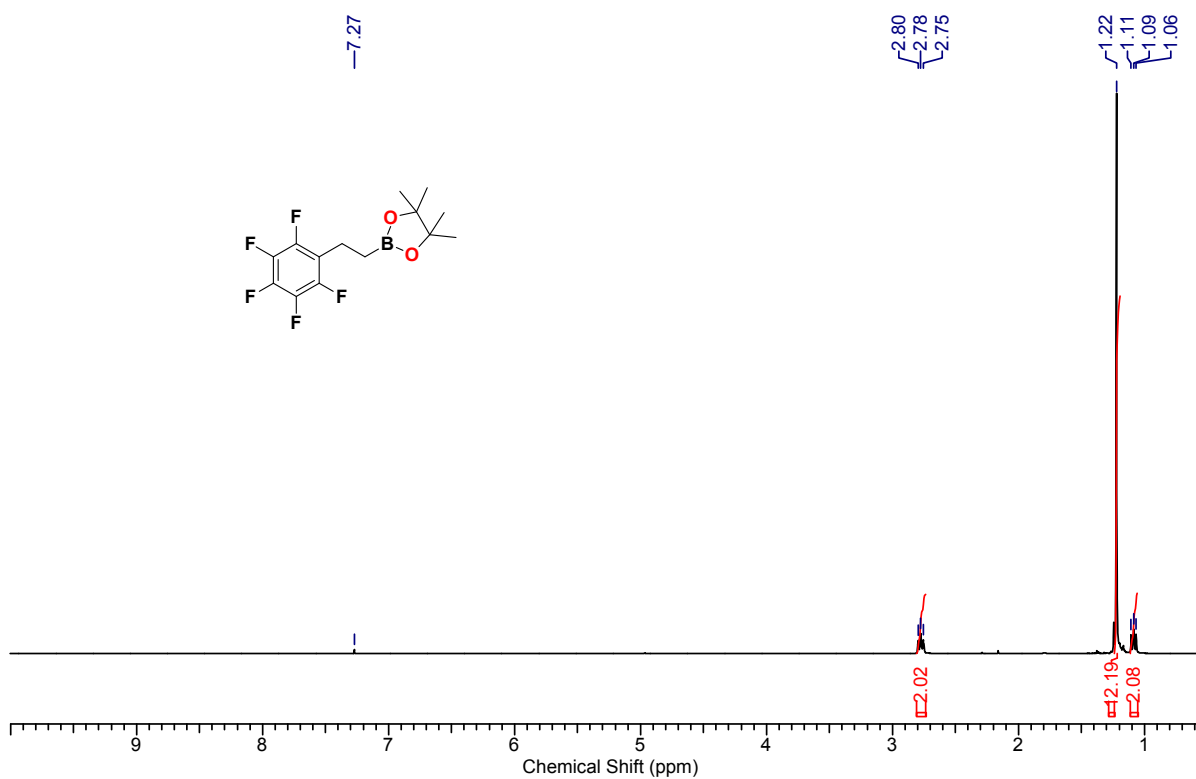

Figure FS22.  $^1\text{H}$  NMR (400 MHz,  $\text{CDCl}_3$ ) spectrum of **2g**.

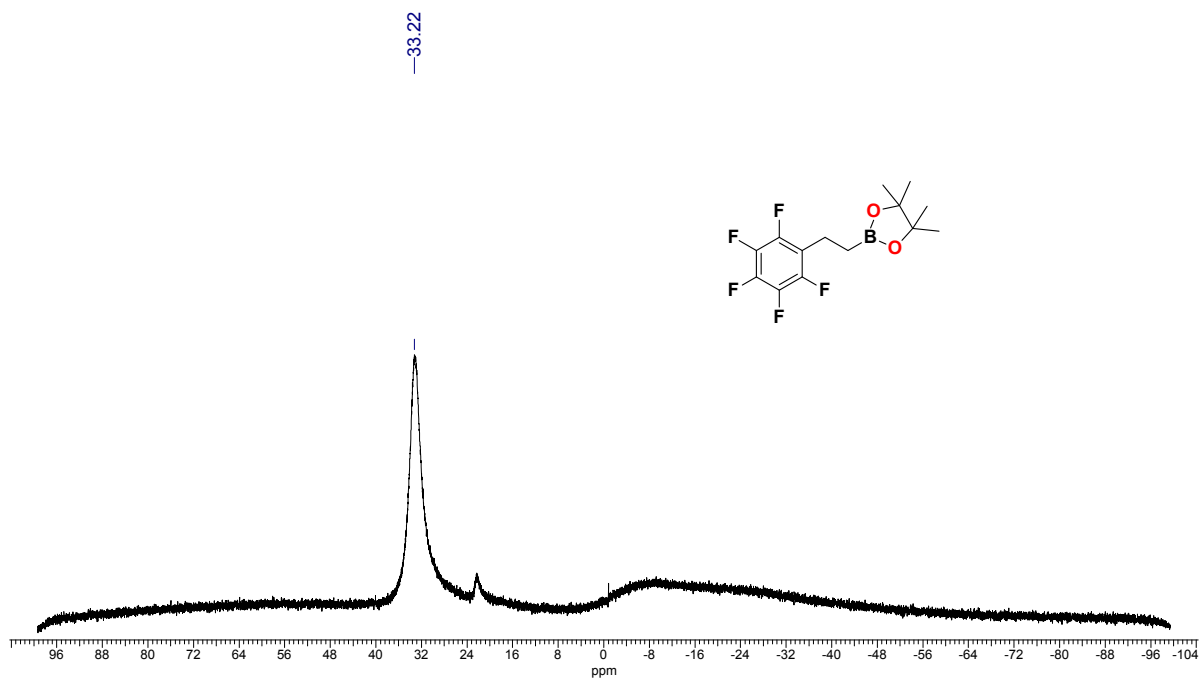

**Figure FS23.**  $^1\text{H}\{^1\text{H}\}$  NMR (128 MHz,  $\text{CDCl}_3$ ) spectrum of **2g**.

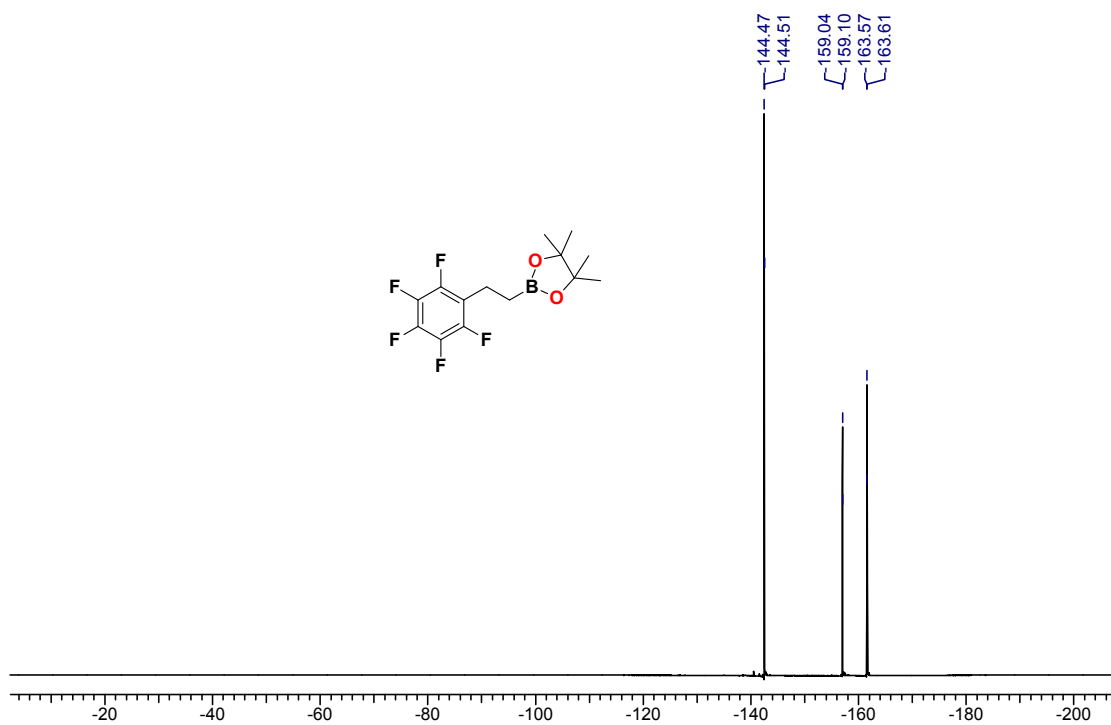

**Figure FS24.**  $^{13}\text{C}\{^1\text{H}\}$  NMR (376 MHz,  $\text{CDCl}_3$ ) spectrum of **2g**.

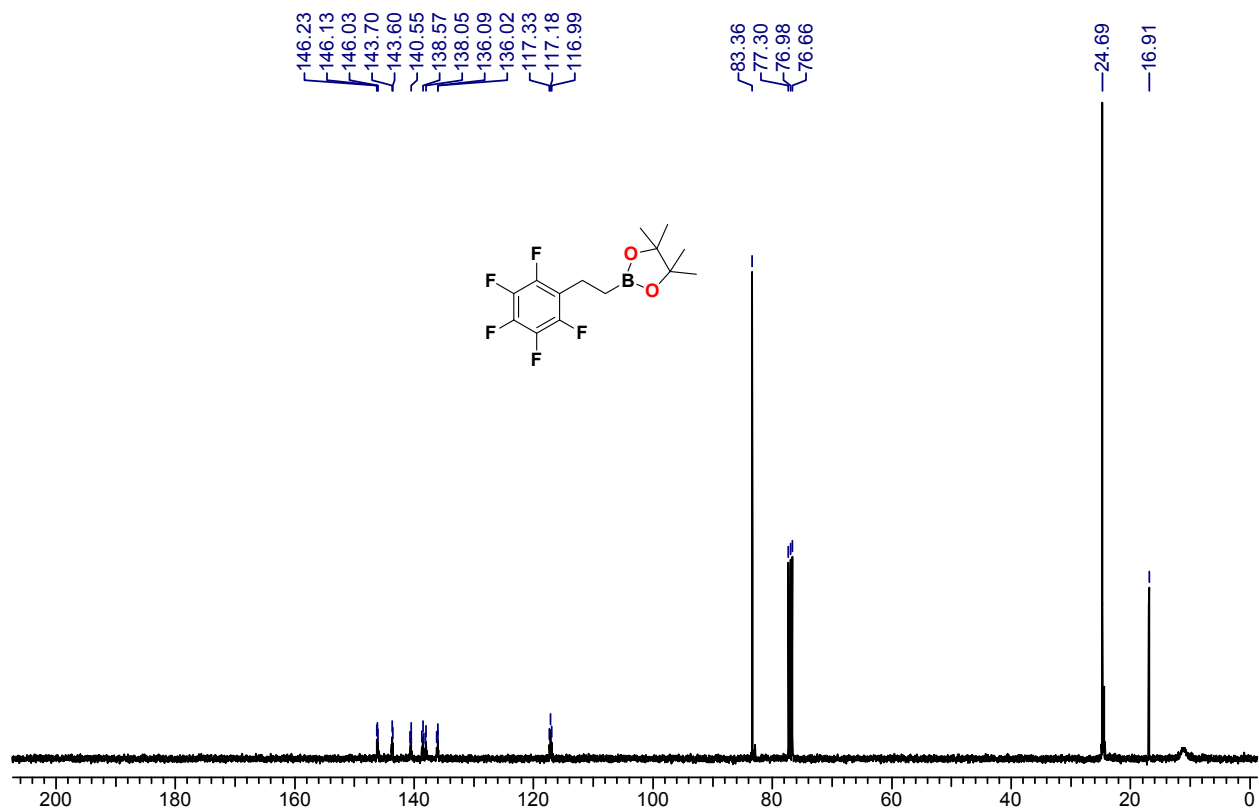

Figure FS25.  $^{13}\text{C}\{^1\text{H}\}$  NMR (100 MHz,  $\text{CDCl}_3$ ) spectrum of **2g**.

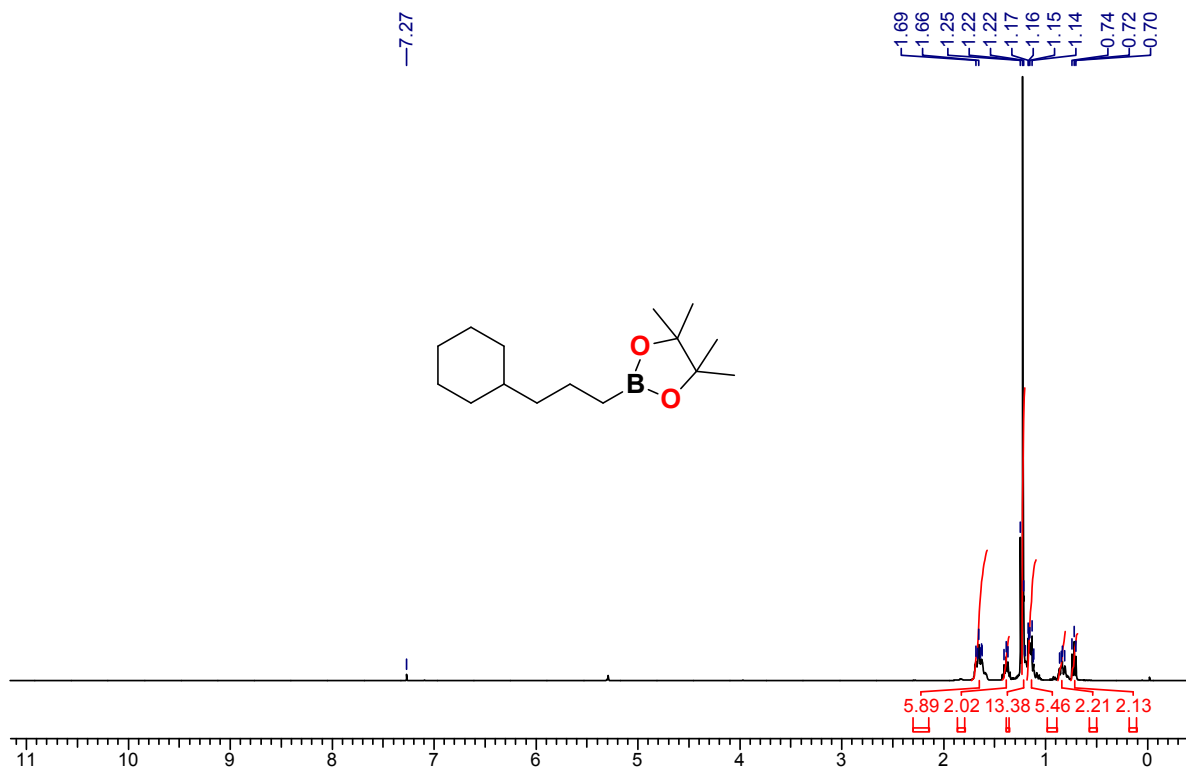

Figure FS26.  $^1\text{H}$  NMR (400 MHz,  $\text{CDCl}_3$ ) spectrum of **2h**.

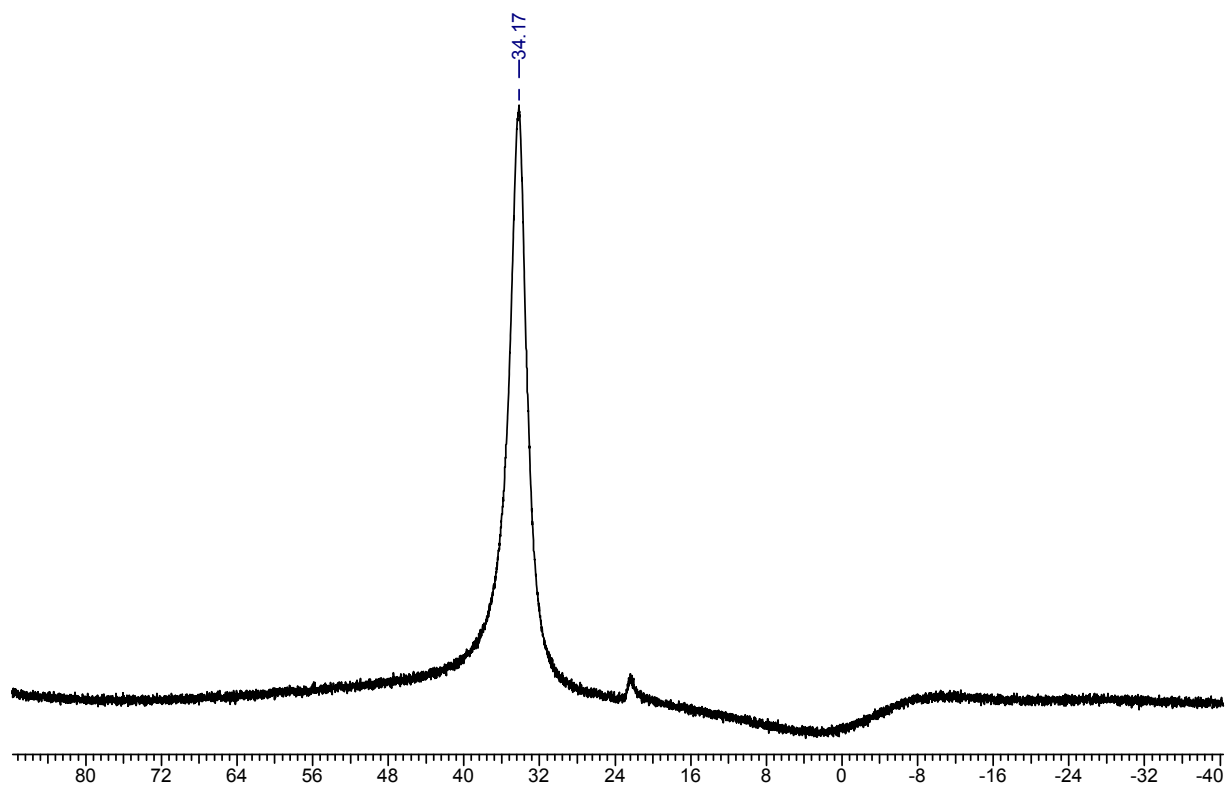

Figure FS27.  $^{11}\text{B}\{^1\text{H}\}$  NMR (128 MHz,  $\text{CDCl}_3$ ) spectrum of **2h**.

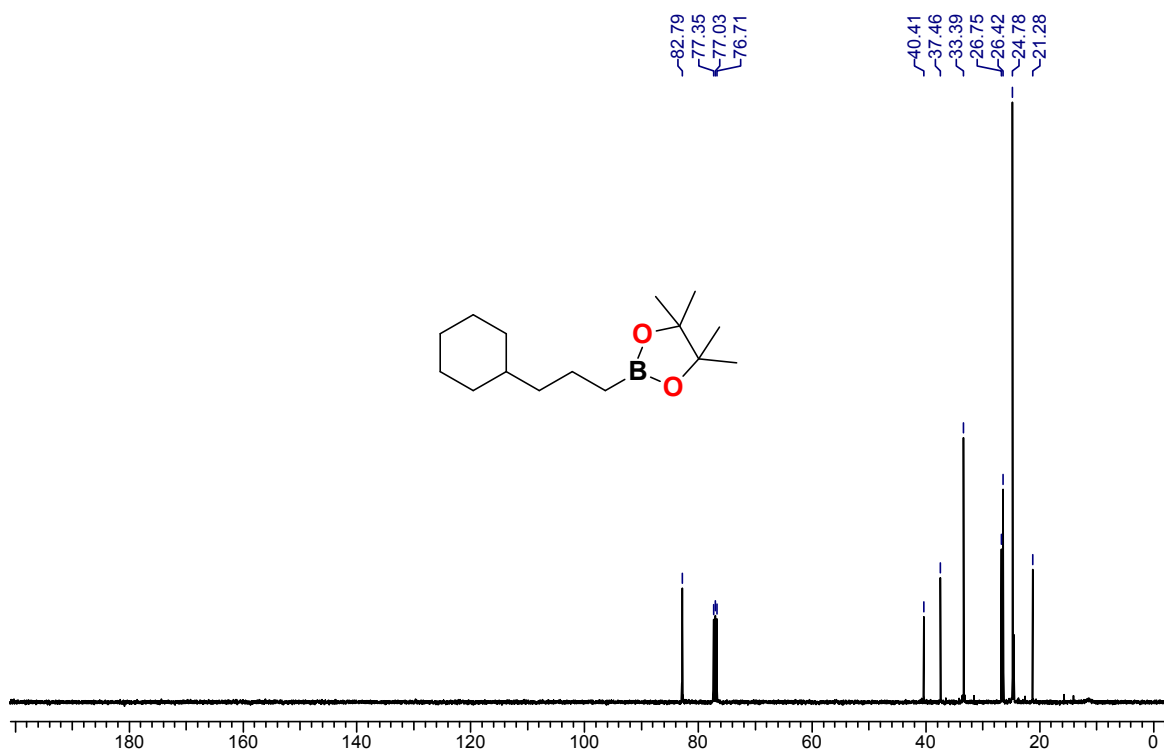

Figure FS28.  $^{13}\text{C}\{^1\text{H}\}$  NMR (100 MHz,  $\text{CDCl}_3$ ) spectrum of **2h**.

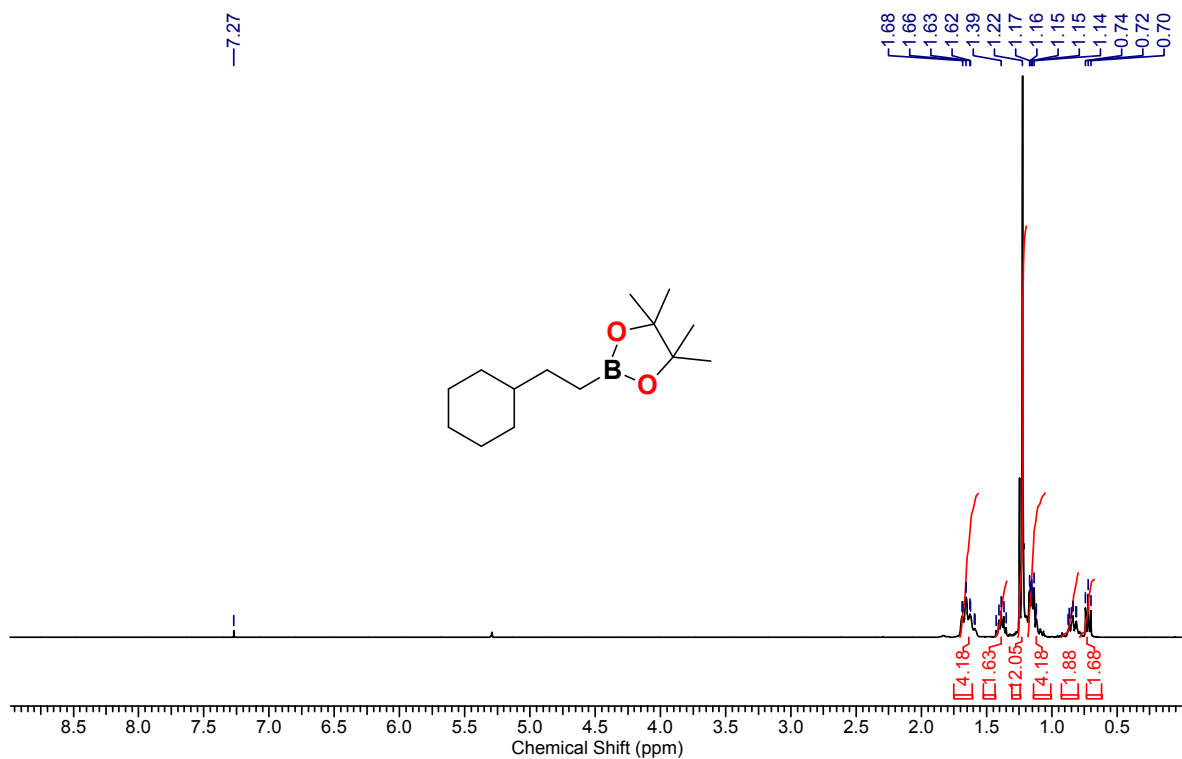

**Figure FS29.**  $^1\text{H}$  NMR (400 MHz,  $\text{CDCl}_3$ ) spectrum of **2i**.

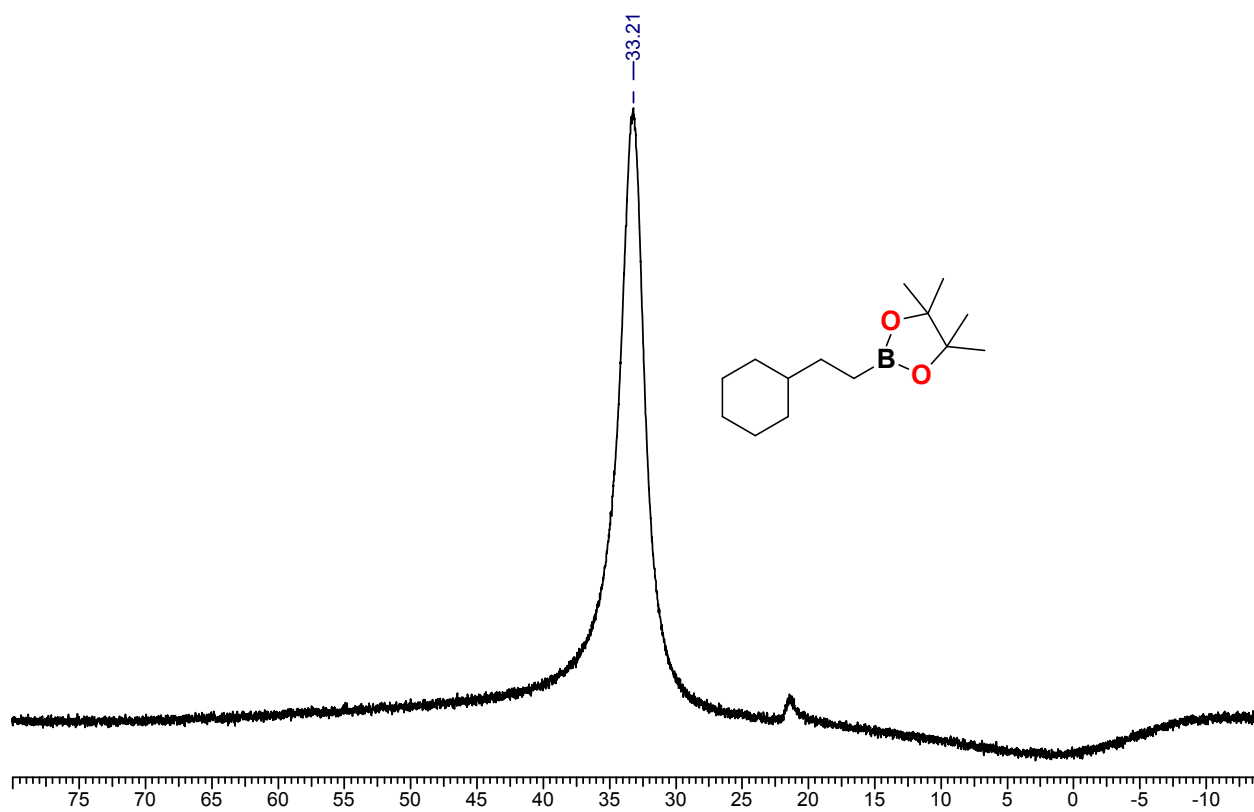

**Figure FS30.**  $^{11}\text{B}\{^1\text{H}\}$  NMR (128 MHz,  $\text{CDCl}_3$ ) spectrum of **2i**.

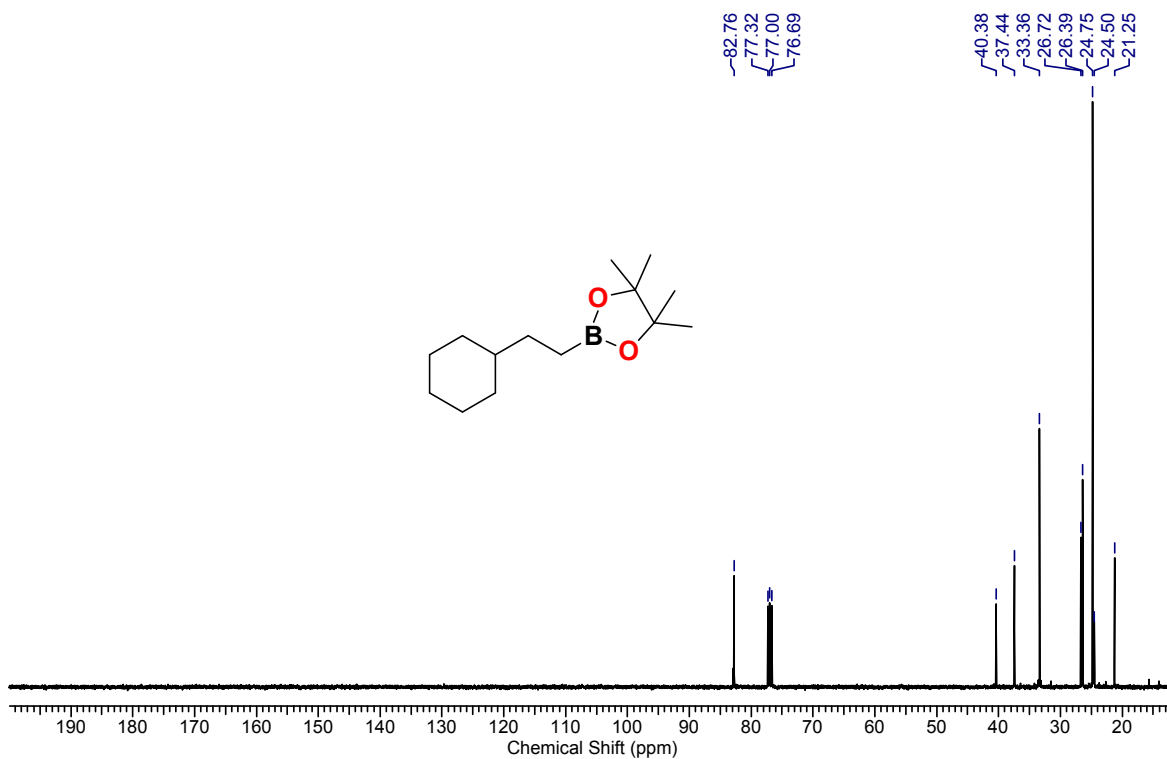

**Figure FS31.**  $^{13}\text{C}\{^1\text{H}\}$  NMR (100 MHz,  $\text{CDCl}_3$ ) spectrum of **2i**.

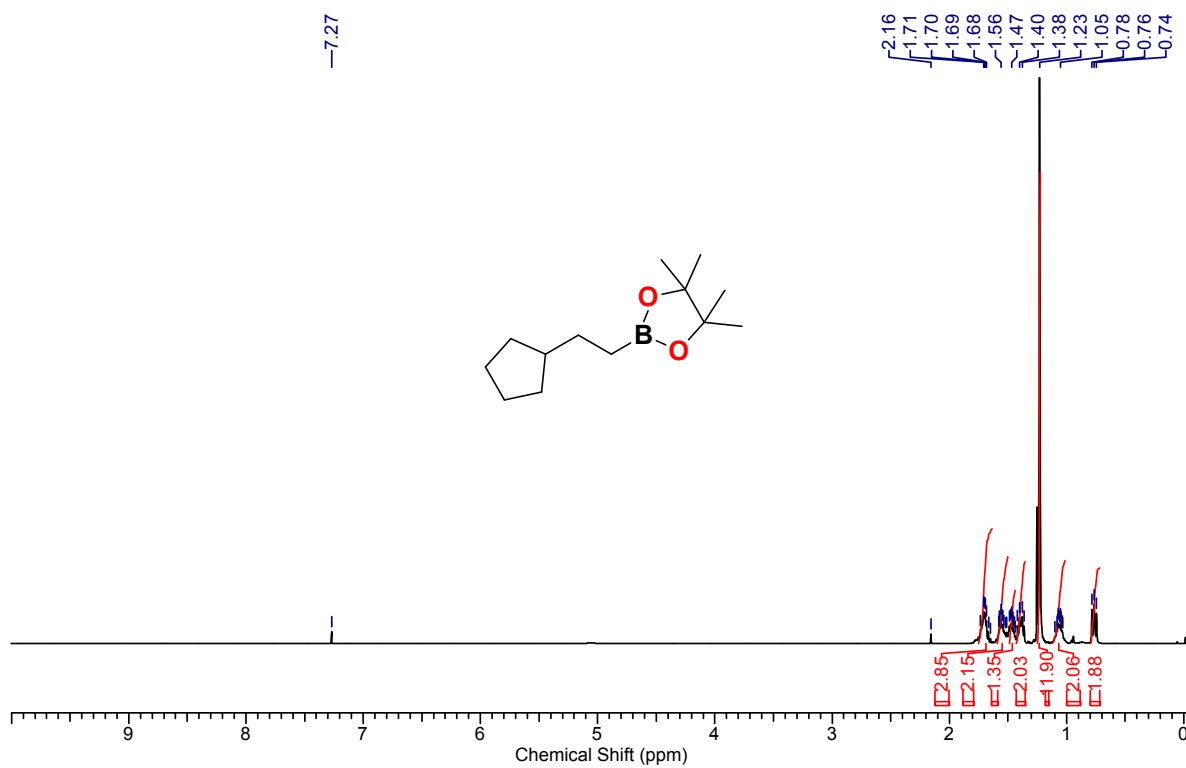

**Figure FS32.**  $^1\text{H}$  NMR (400 MHz,  $\text{CDCl}_3$ ) spectrum of **2j**.

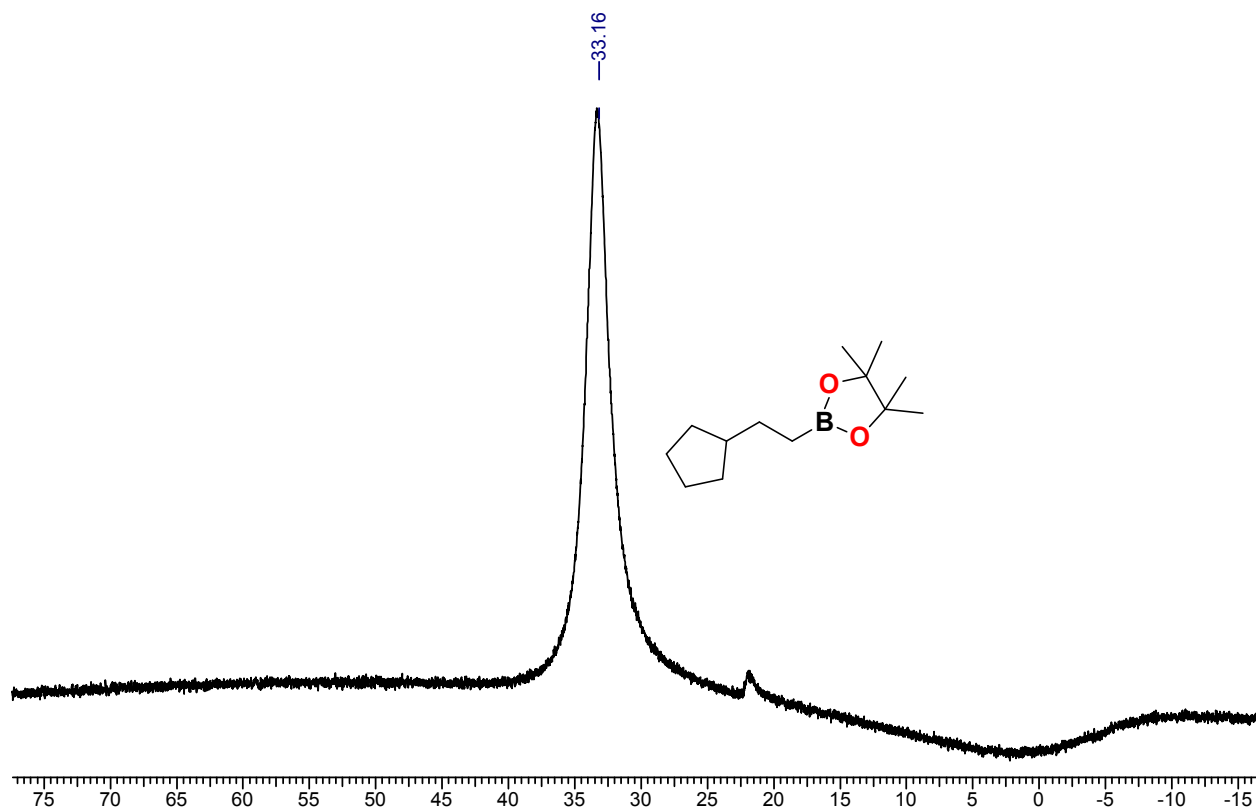

Figure FS33.  $^{11}\text{B}\{^1\text{H}\}$  NMR (128 MHz,  $\text{CDCl}_3$ ) spectrum of **2j**.

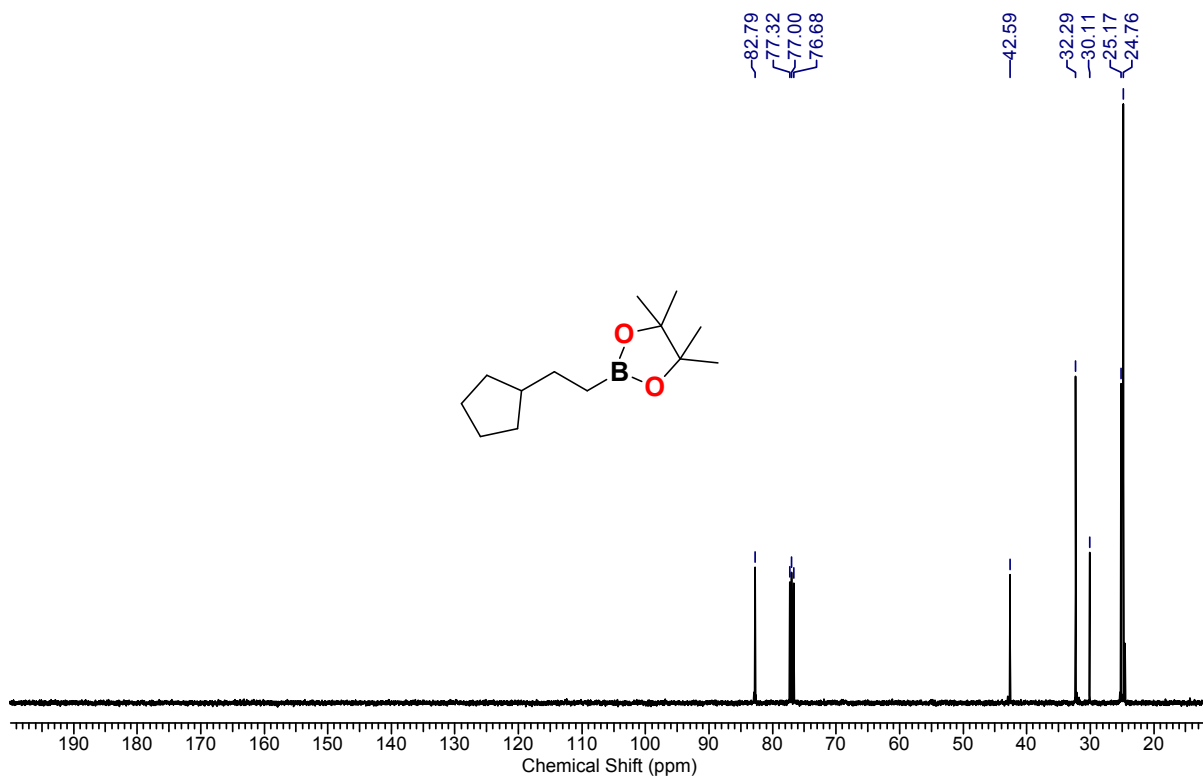

Figure FS34.  $^{13}\text{C}\{^1\text{H}\}$  NMR (100 MHz,  $\text{CDCl}_3$ ) spectrum of **2j**.

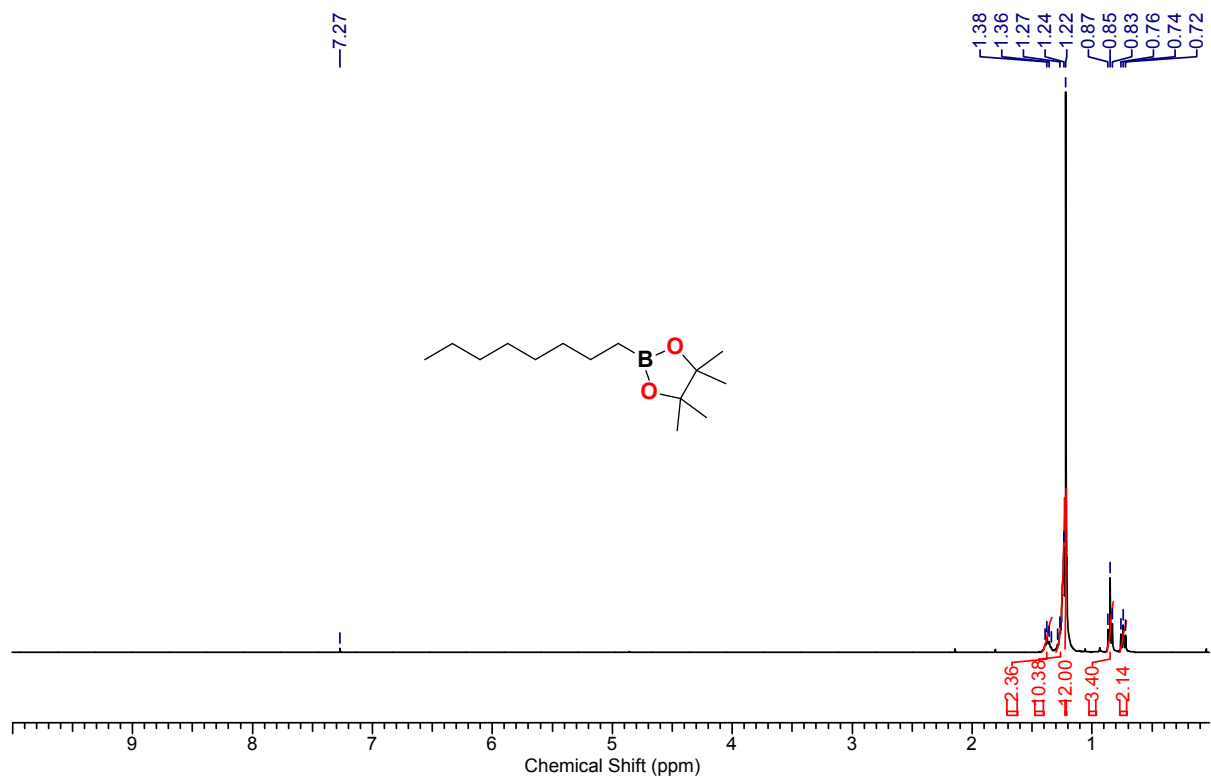

**Figure FS35.**  $^1\text{H}$  NMR (400 MHz,  $\text{CDCl}_3$ ) spectrum of **2k**.

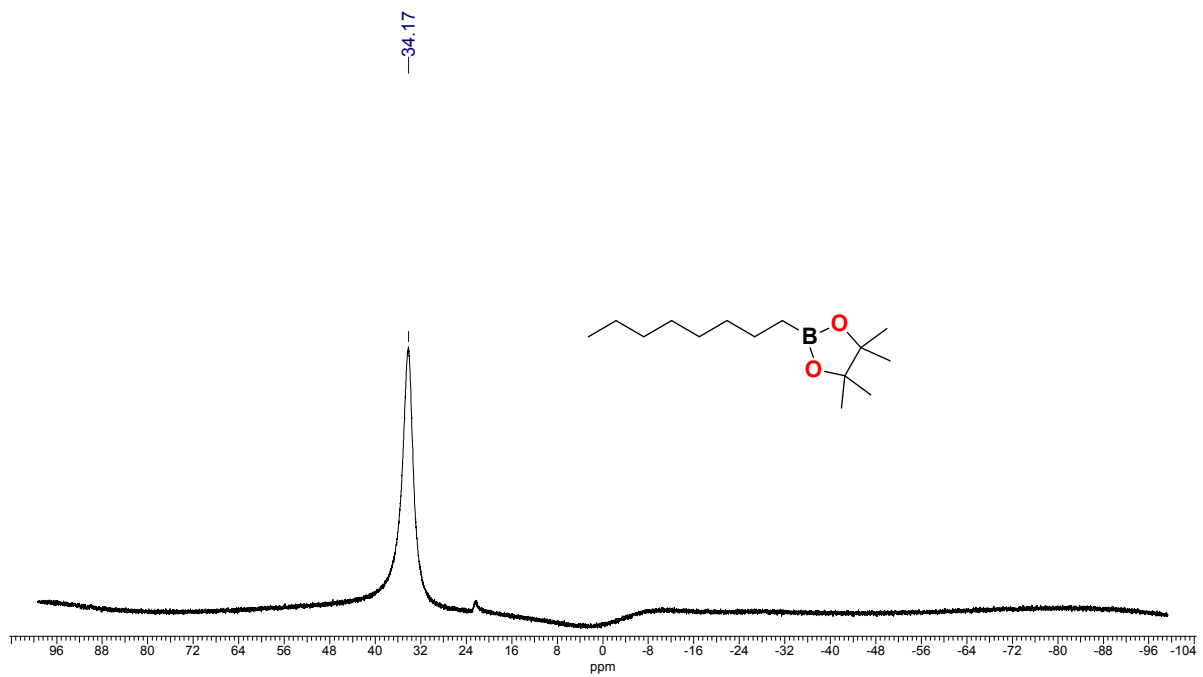

**Figure FS36.**  $^{11}\text{B}\{^1\text{H}\}$  NMR (128 MHz,  $\text{CDCl}_3$ ) spectrum of **2k**.



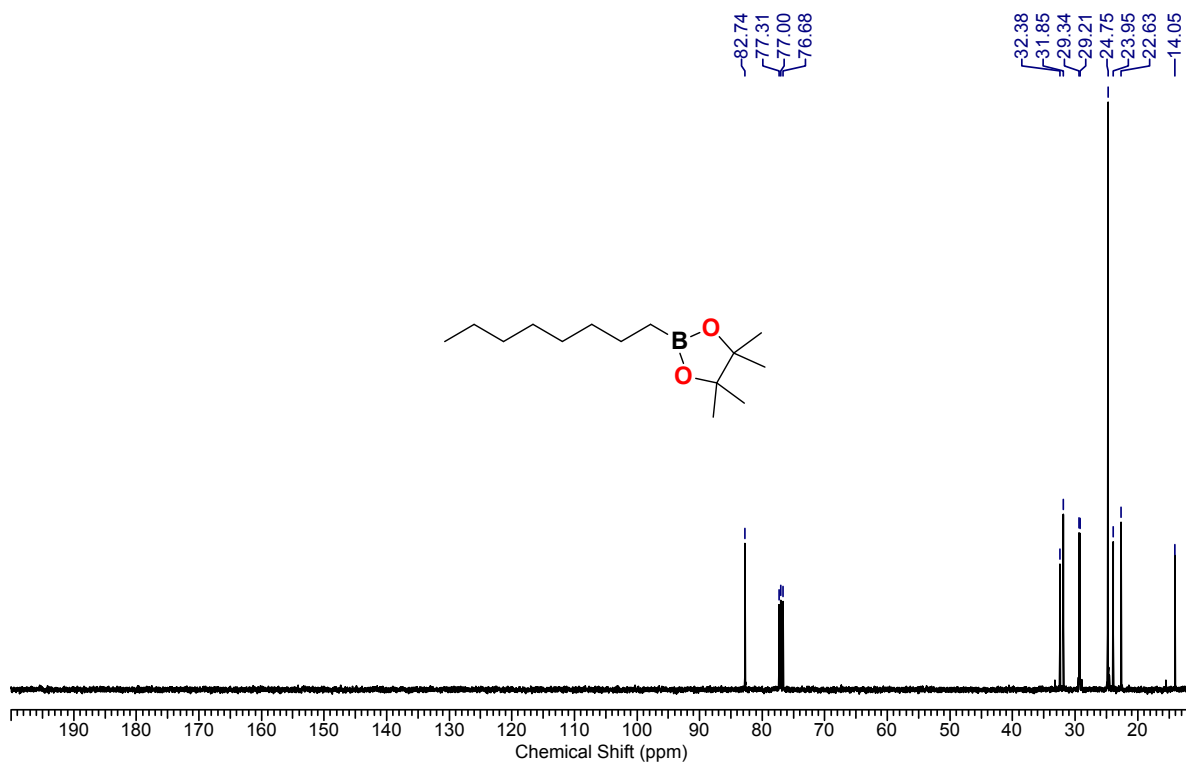

Figure FS37.  $^{13}\text{C}\{^1\text{H}\}$  NMR (100 MHz,  $\text{CDCl}_3$ ) spectrum of **2k**.

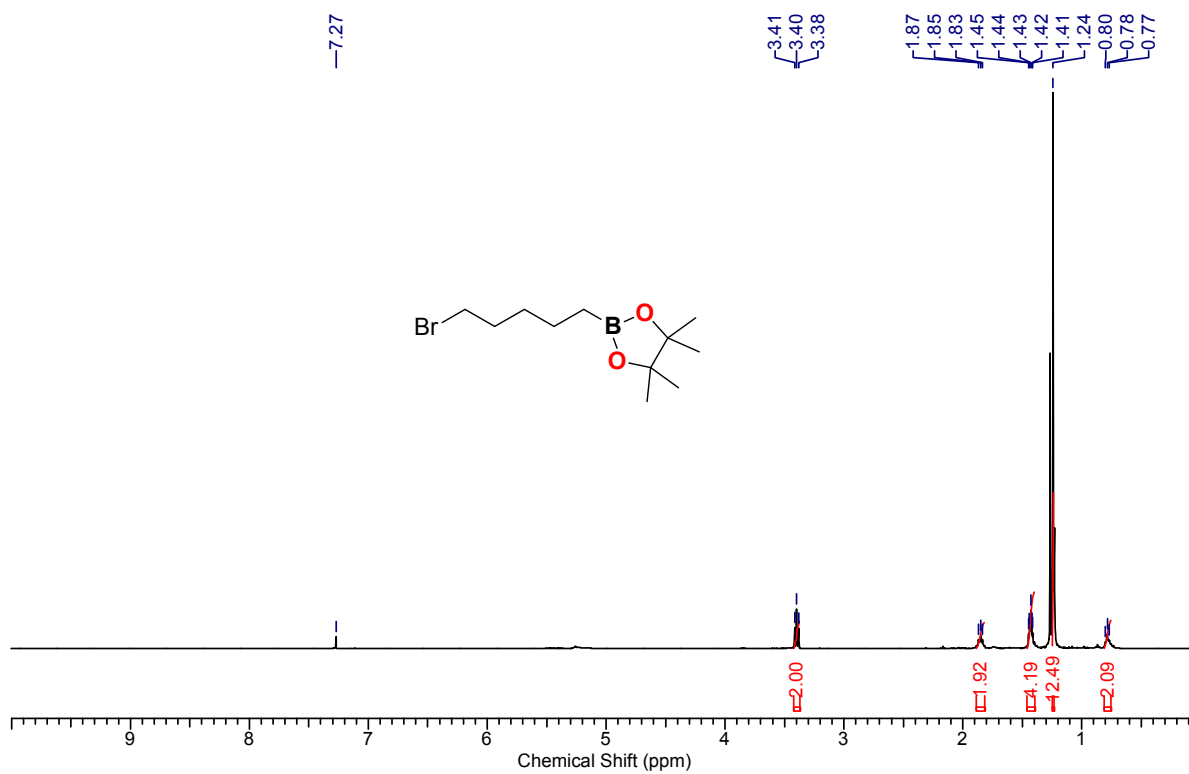

Figure FS38.  $^1\text{H}$  NMR (400 MHz,  $\text{CDCl}_3$ ) spectrum of **2l**.

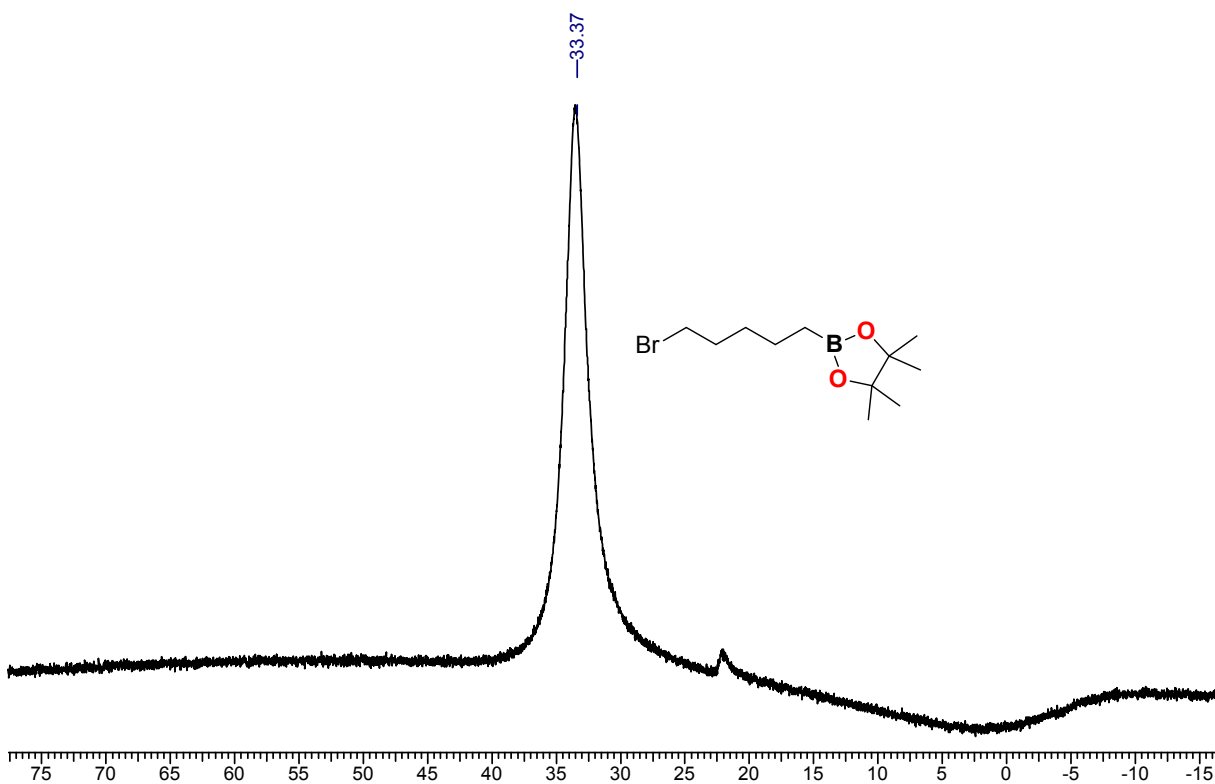

Figure FS39.  $^{11}\text{B}\{^1\text{H}\}$  NMR (128 MHz,  $\text{CDCl}_3$ ) spectrum of **21**.

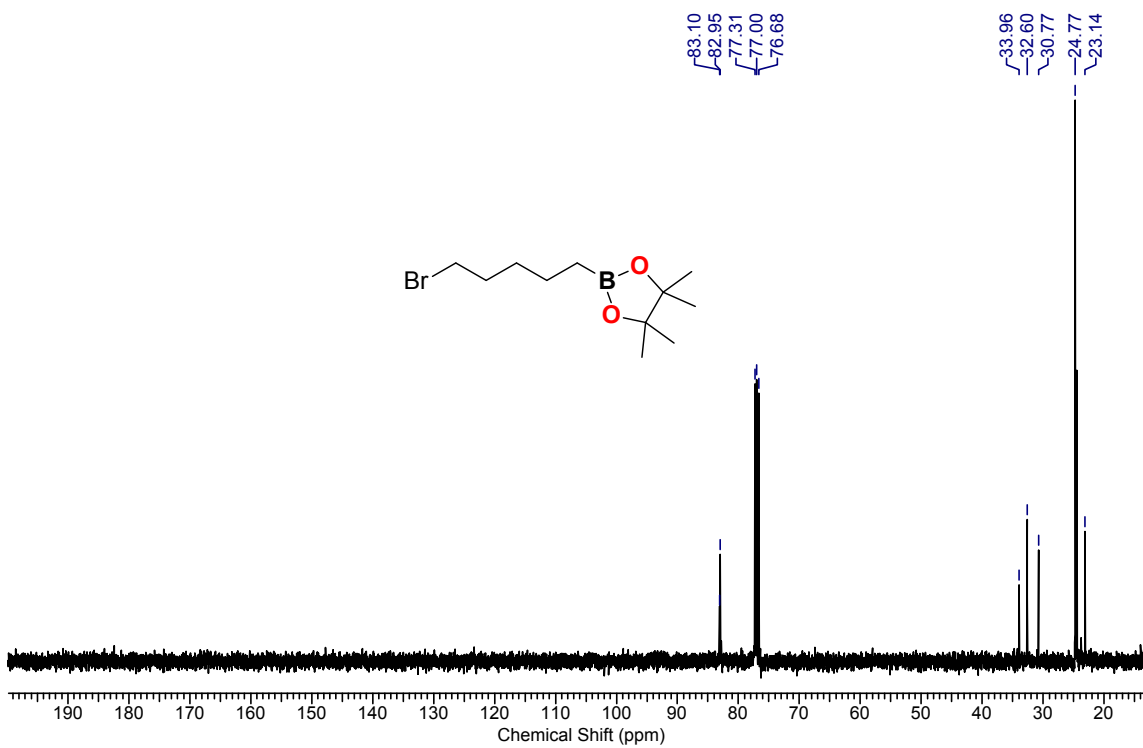

Figure FS40.  $^{13}\text{C}\{^1\text{H}\}$  NMR (100 MHz,  $\text{CDCl}_3$ ) spectrum of **21**.

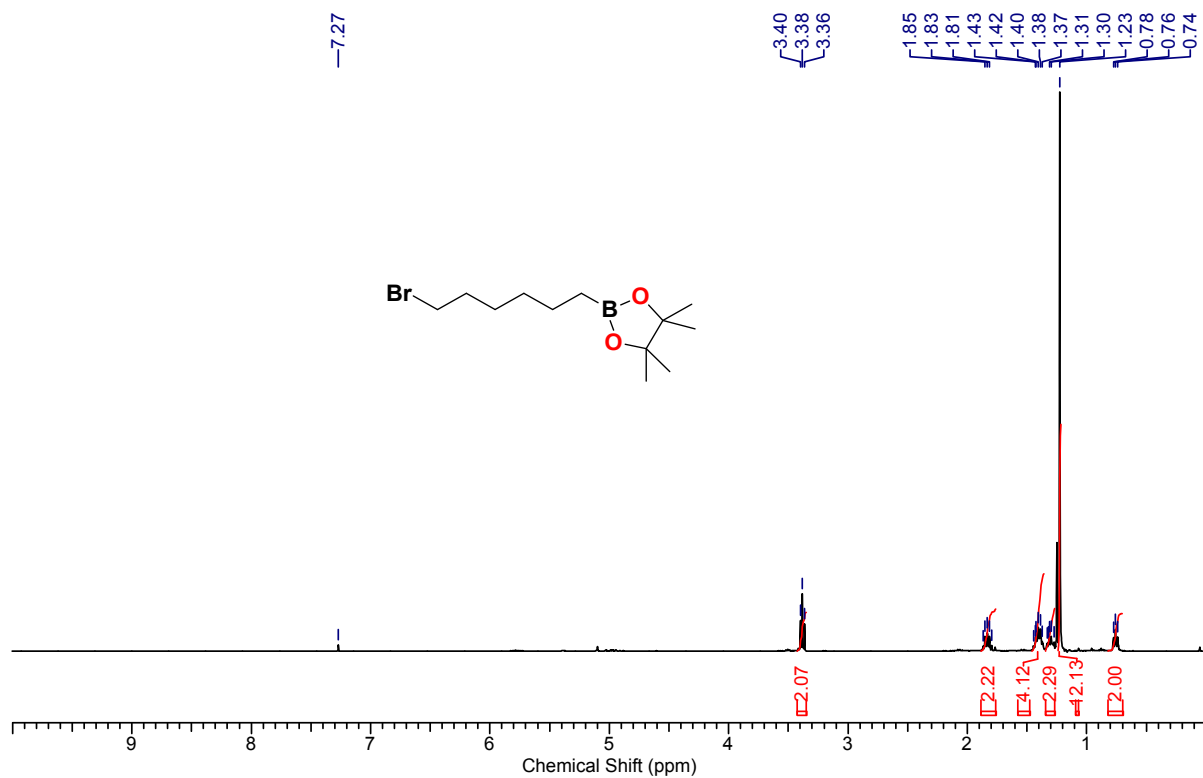

Figure FS41.  $^1\text{H}$  NMR (400 MHz,  $\text{CDCl}_3$ ) spectrum of **2m**.

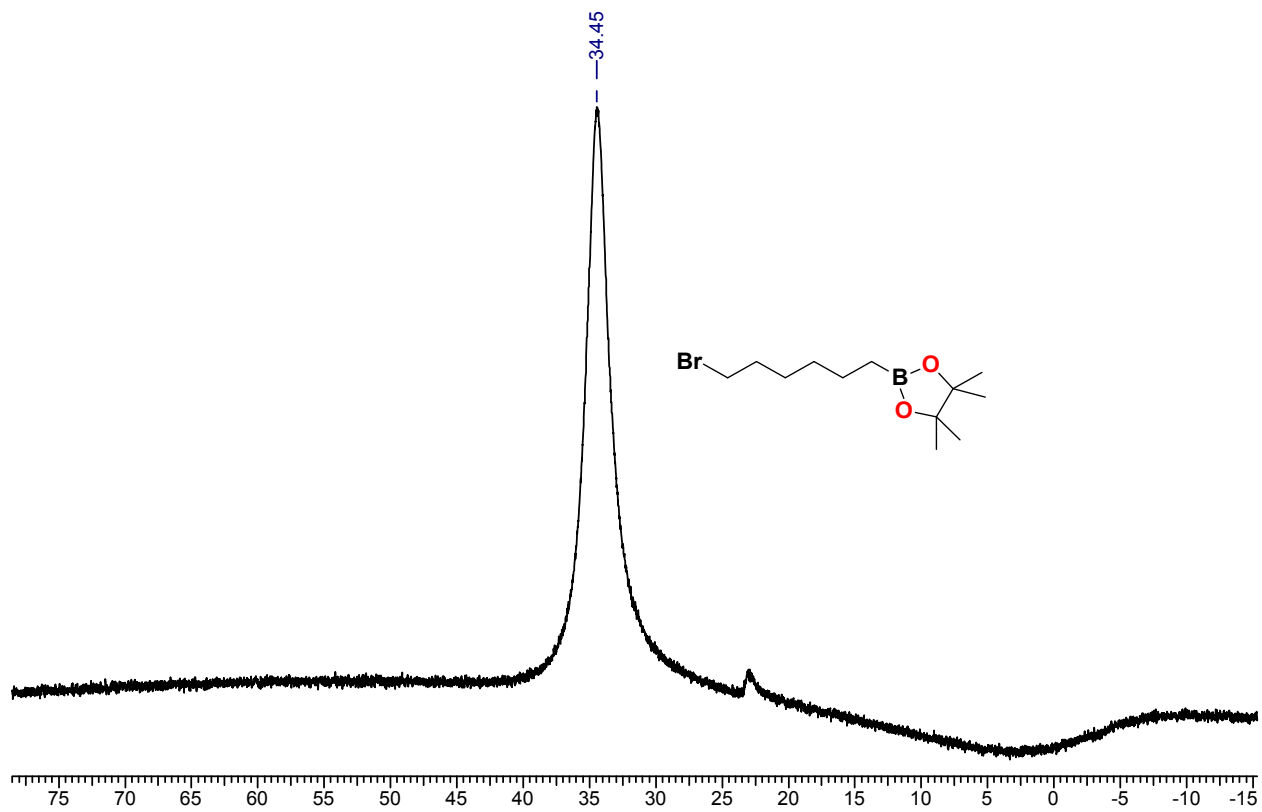

Figure FS42.  $^{11}\text{B}\{^1\text{H}\}$  NMR (128 MHz,  $\text{CDCl}_3$ ) spectrum of **2m**.

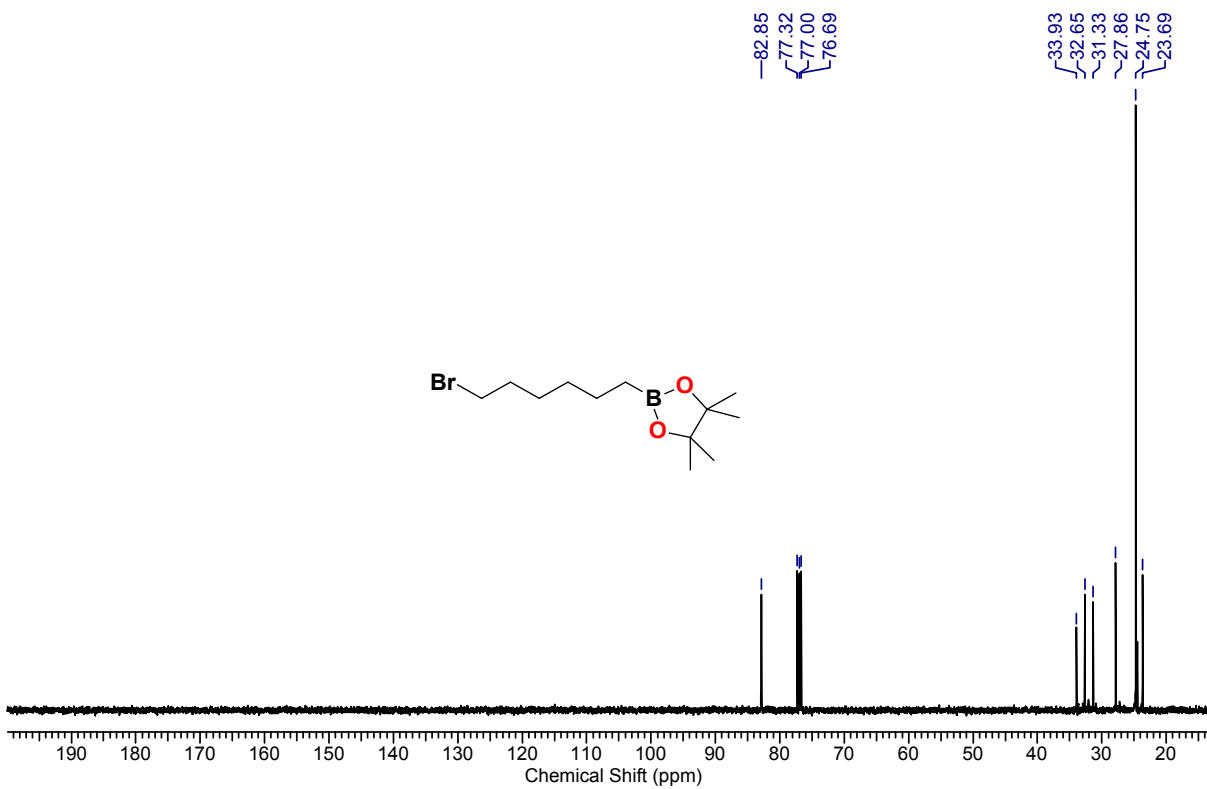

**Figure FS43.**  $^{13}\text{C}\{^1\text{H}\}$  NMR (100 MHz,  $\text{CDCl}_3$ ) spectrum of **2m**.

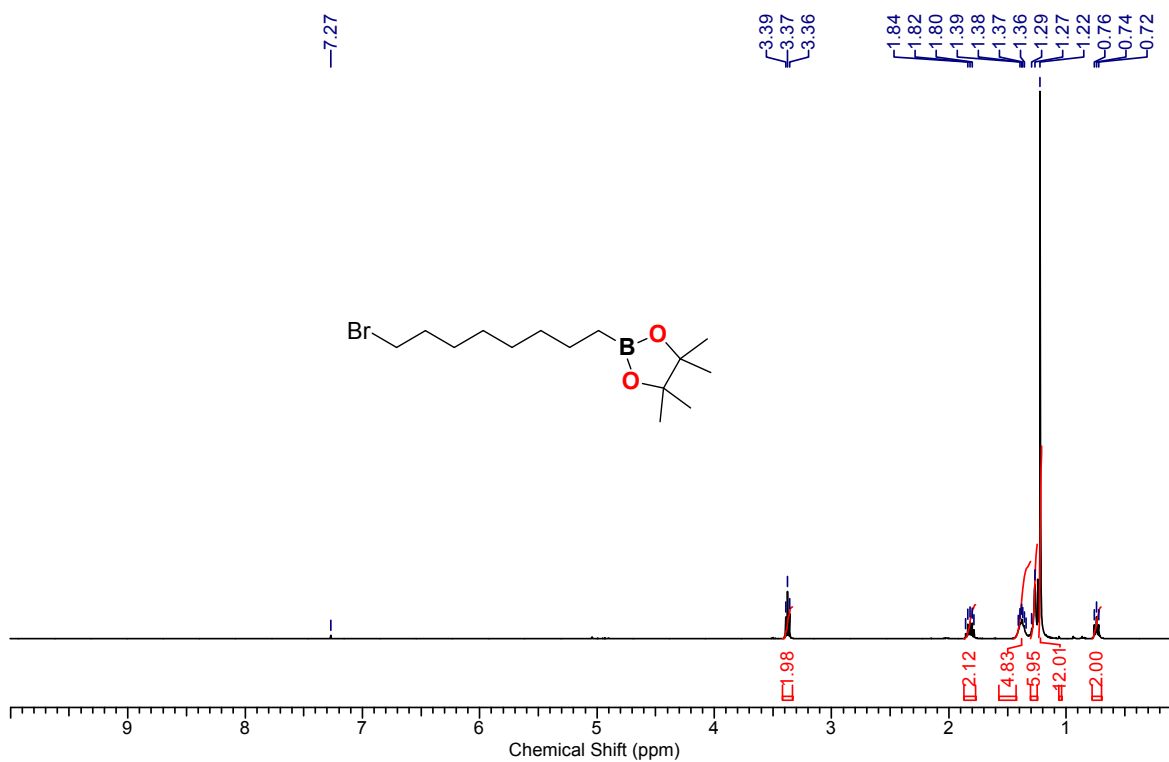

**Figure FS44.**  $^1\text{H}$  NMR (400 MHz,  $\text{CDCl}_3$ ) spectrum of **2n**.

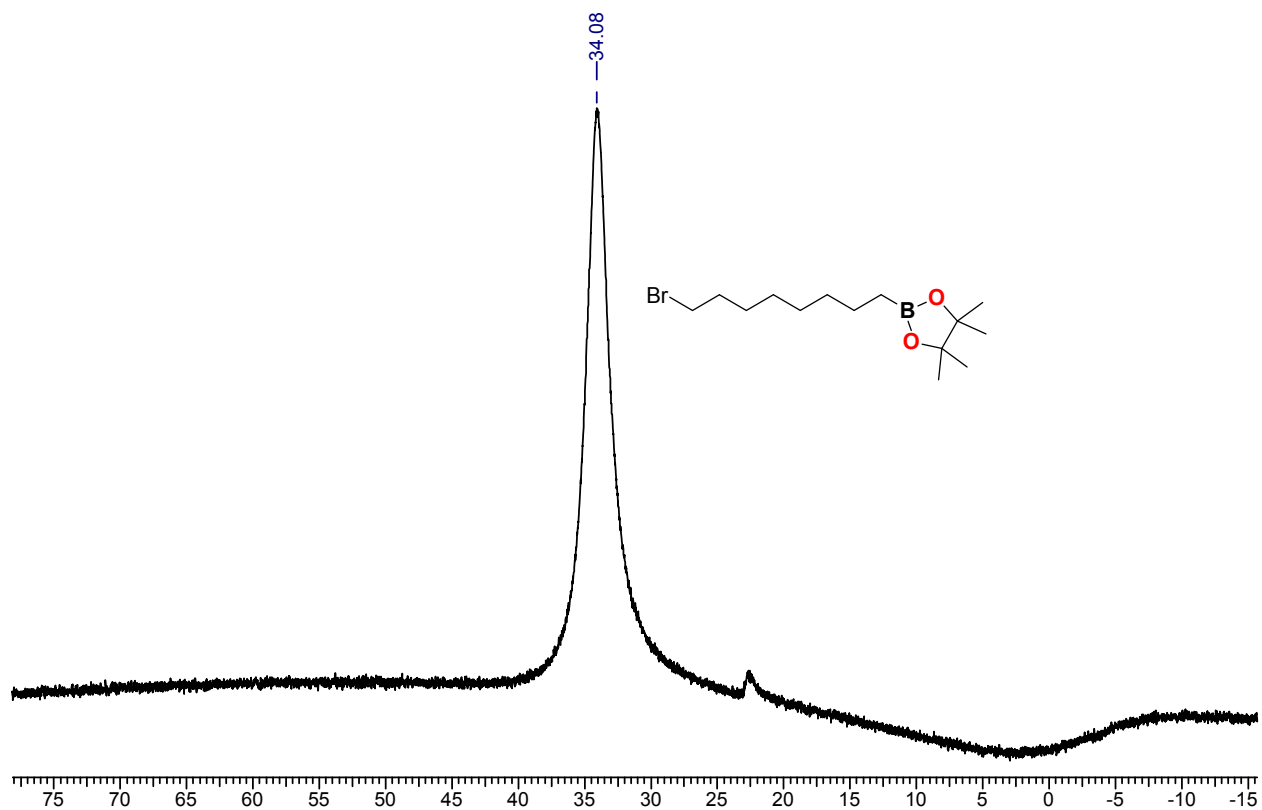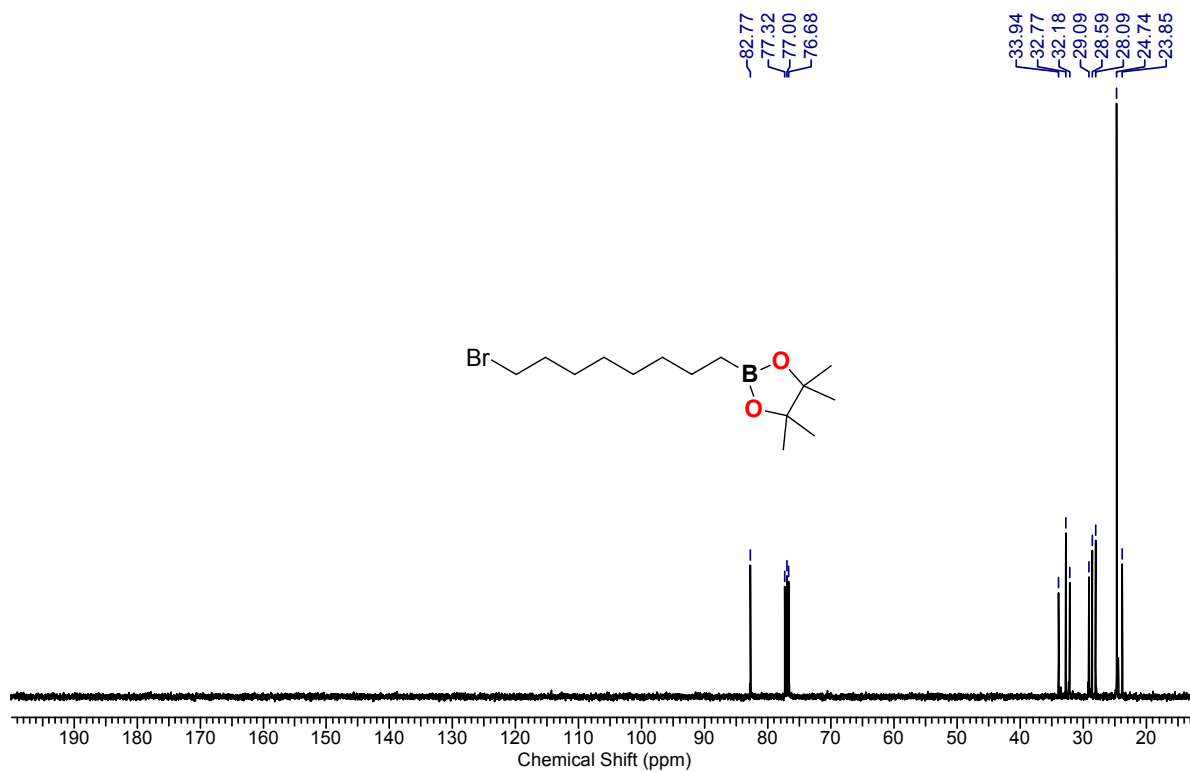

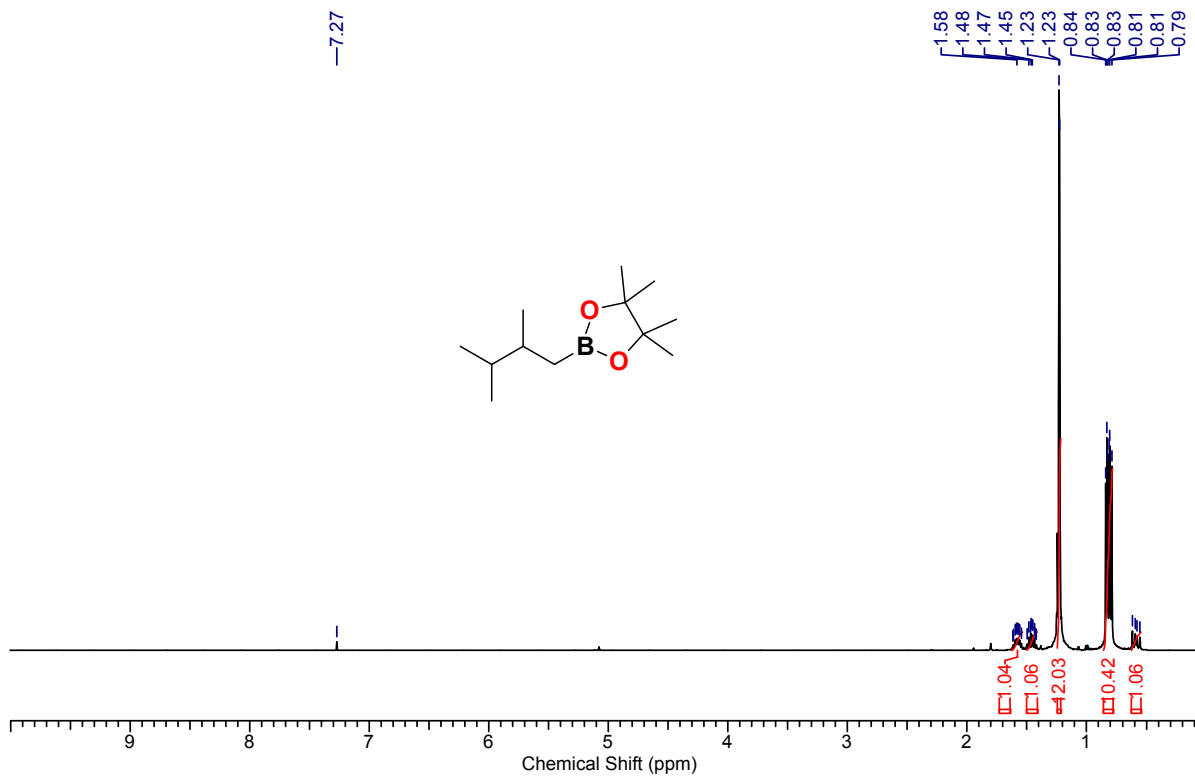

**Figure FS47.**  $^1\text{H}$  NMR (400 MHz,  $\text{CDCl}_3$ ) spectrum of **20**.

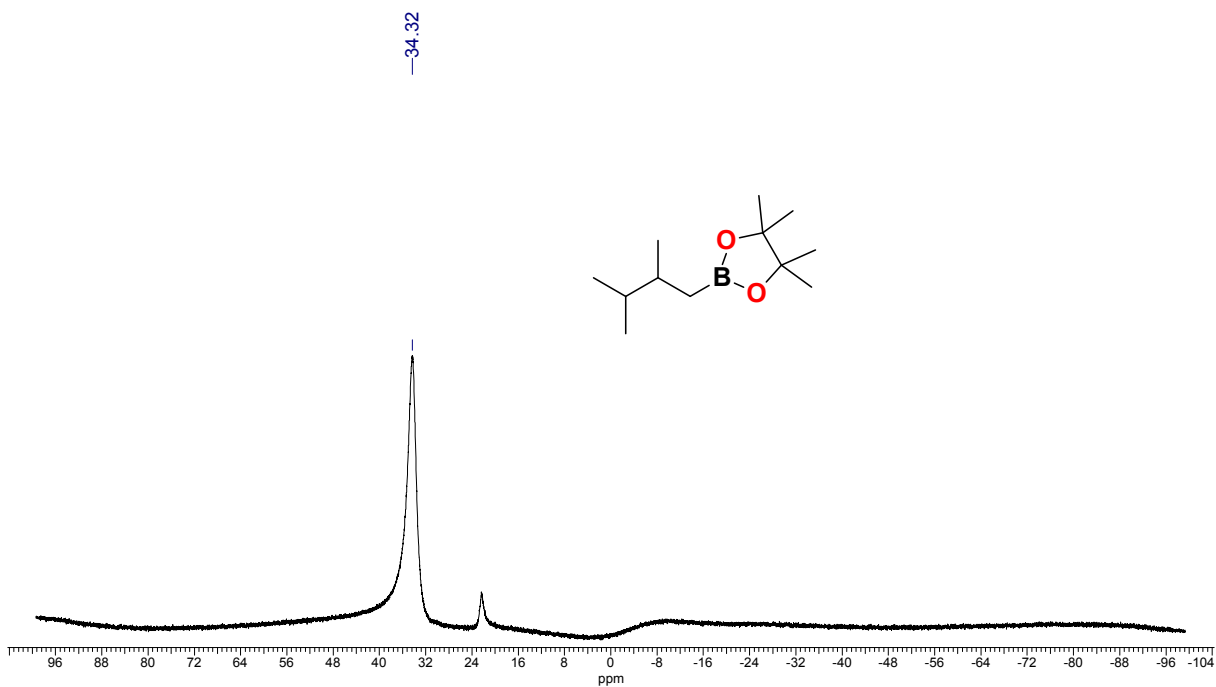

**Figure FS48.**  $^{11}\text{B}\{^1\text{H}\}$  NMR (128 MHz,  $\text{CDCl}_3$ ) spectrum of **20**.

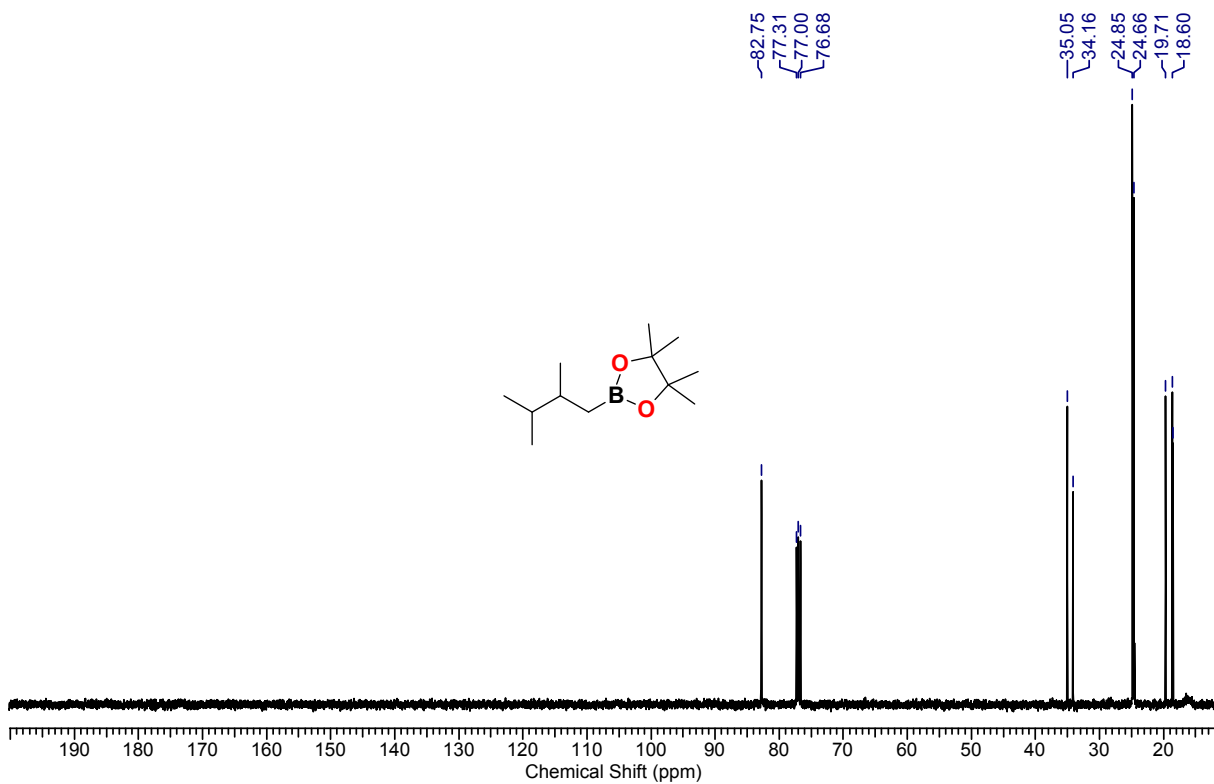

**Figure FS49.**  $^{13}\text{C}$   $\{^1\text{H}\}$  NMR (100 MHz,  $\text{CDCl}_3$ ) spectrum of **2o**.

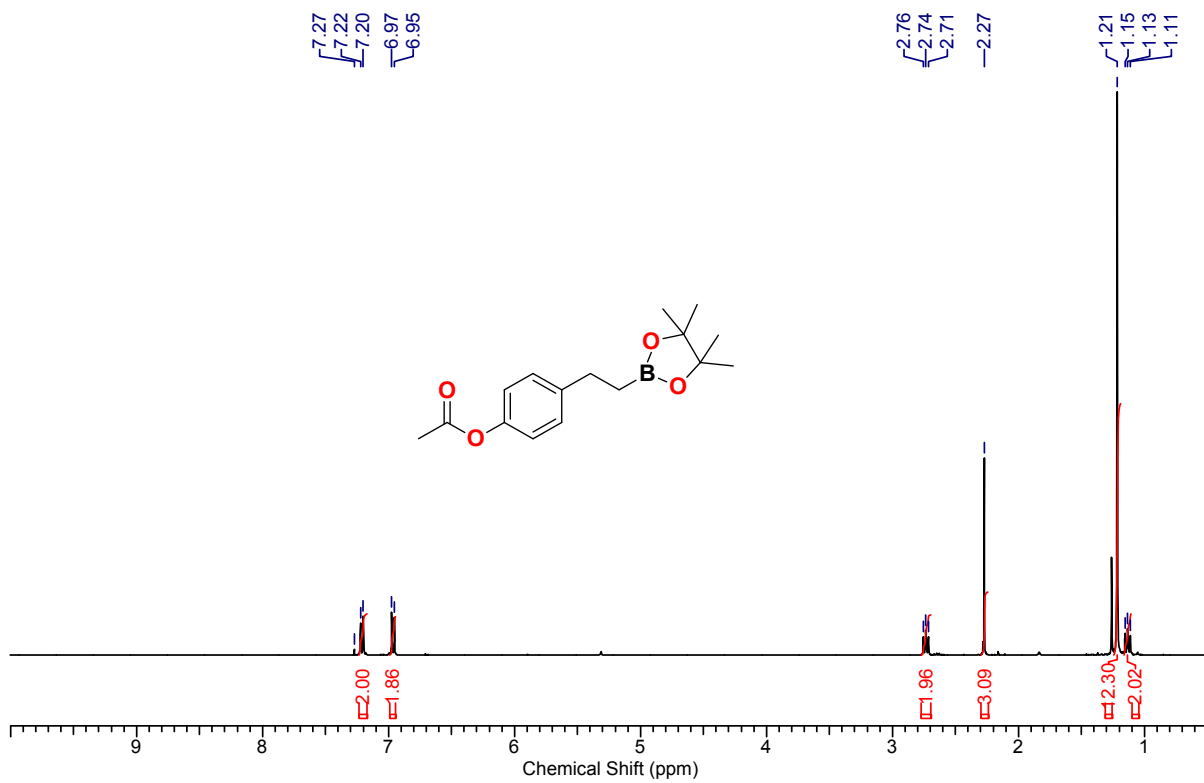

**Figure FS50.**  $^1\text{H}$  NMR (400 MHz,  $\text{CDCl}_3$ ) spectrum of **2p**.

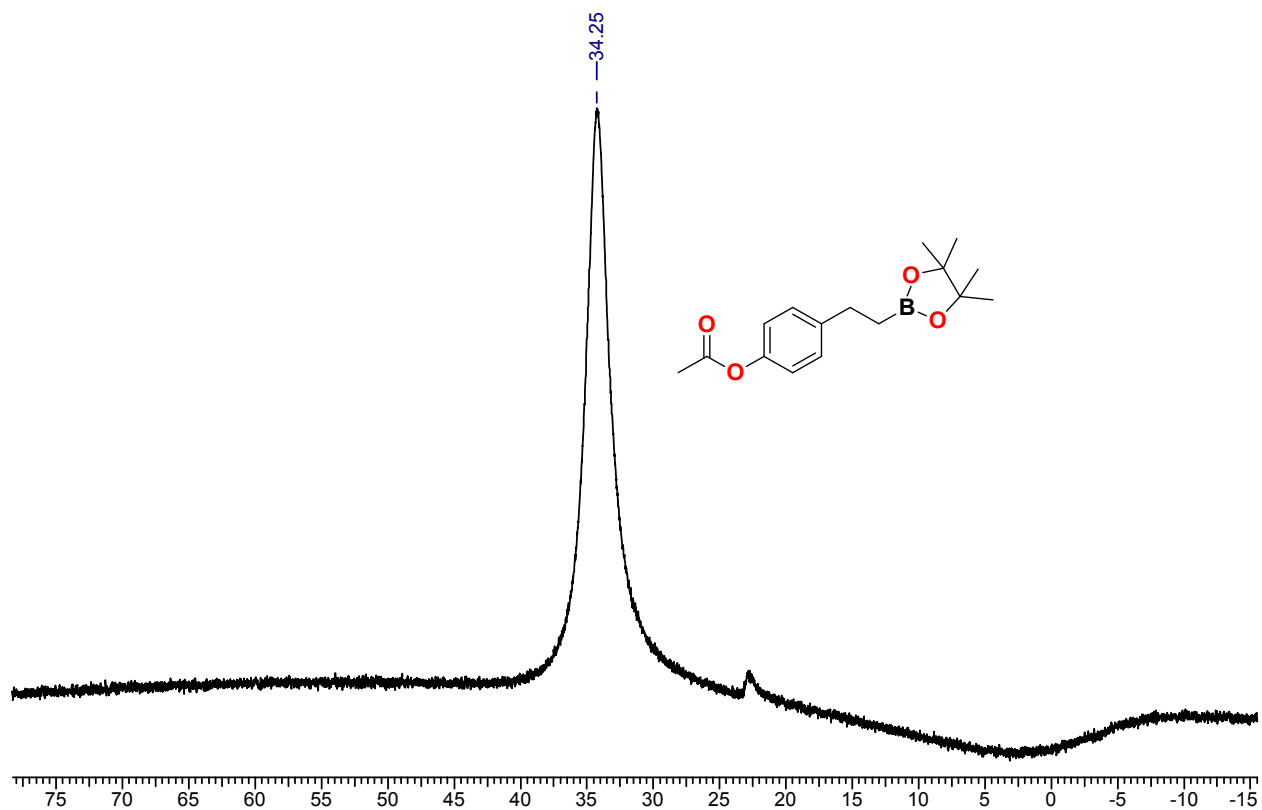

Figure FS51.  $^{11}\text{B}\{^1\text{H}\}$  NMR (128 MHz,  $\text{CDCl}_3$ ) spectrum of **2p**.

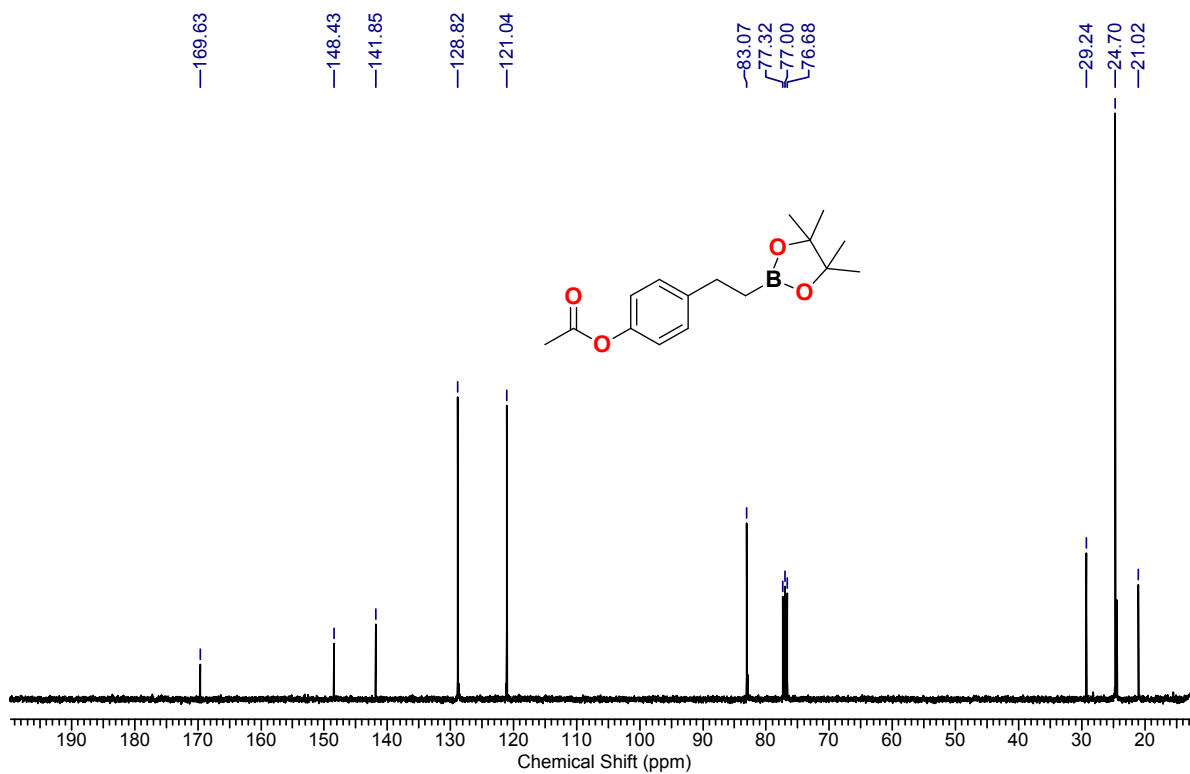

Figure FS52.  $^{13}\text{C}\{^1\text{H}\}$  NMR (100 MHz,  $\text{CDCl}_3$ ) spectrum of **2p**.



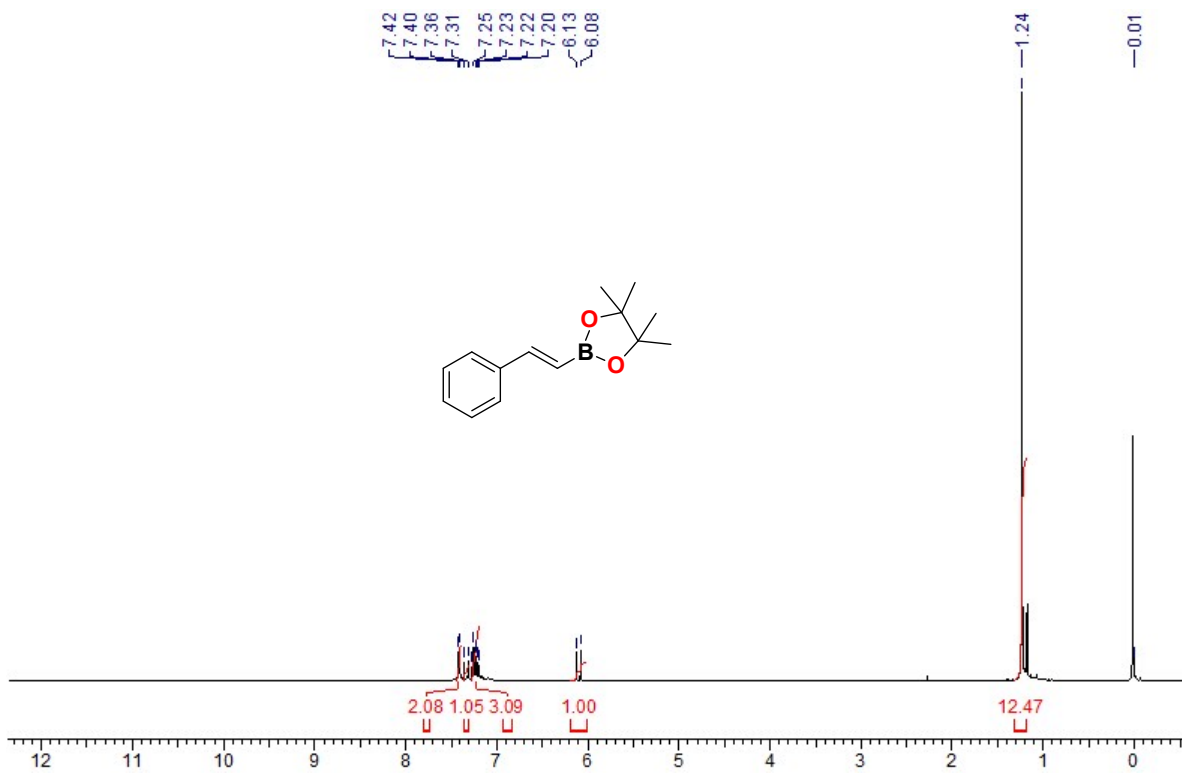

Figure FS53.  $^1\text{H}$  NMR (400 MHz,  $\text{CDCl}_3$ ) spectrum of **3a**.

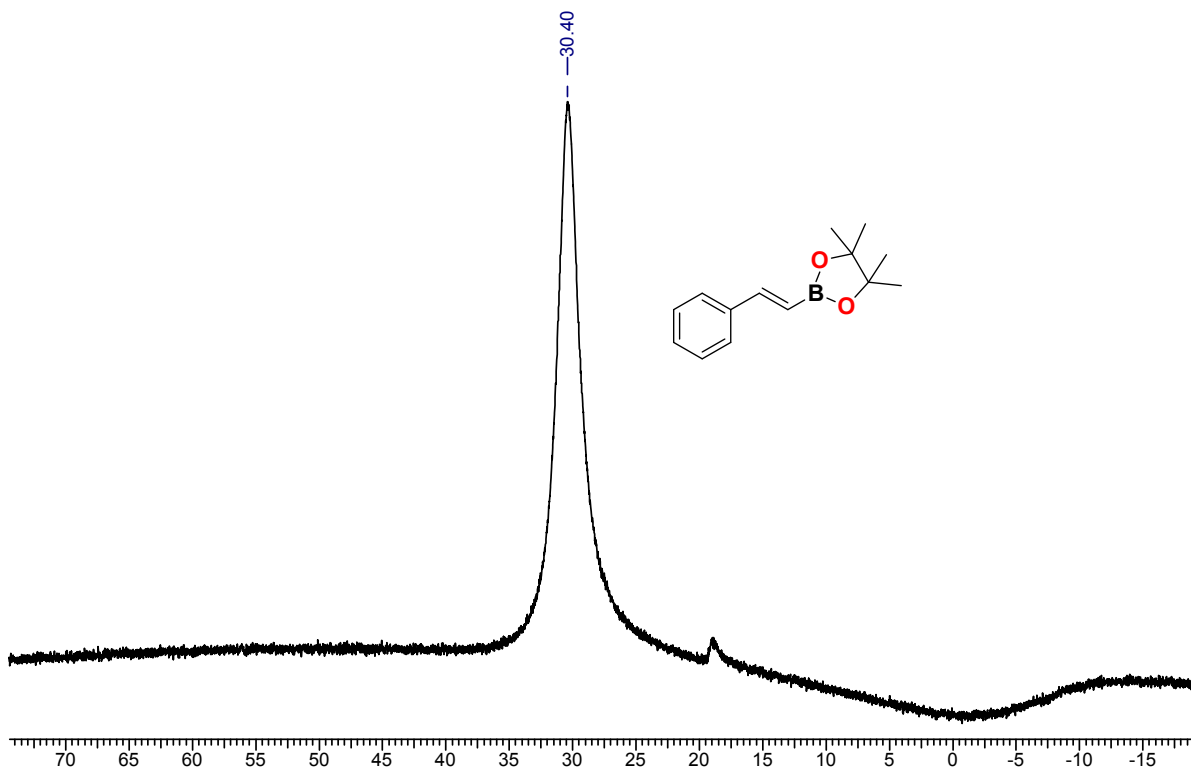

Figure FS54.  $^{11}\text{B}\{^1\text{H}\}$  NMR (128 MHz,  $\text{CDCl}_3$ ) spectrum of **3a**.

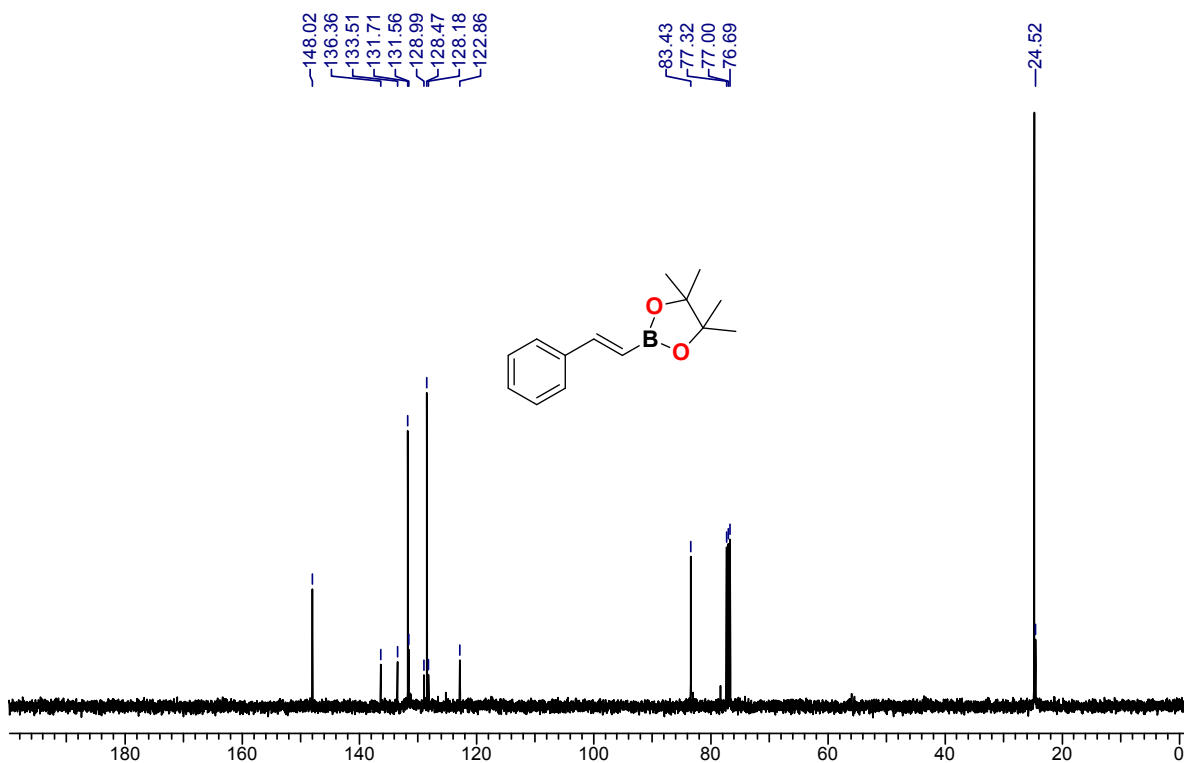

Figure FS55.  $^{13}\text{C}$   $\{^1\text{H}\}$  NMR (100 MHz,  $\text{CDCl}_3$ ) spectrum of 3a.

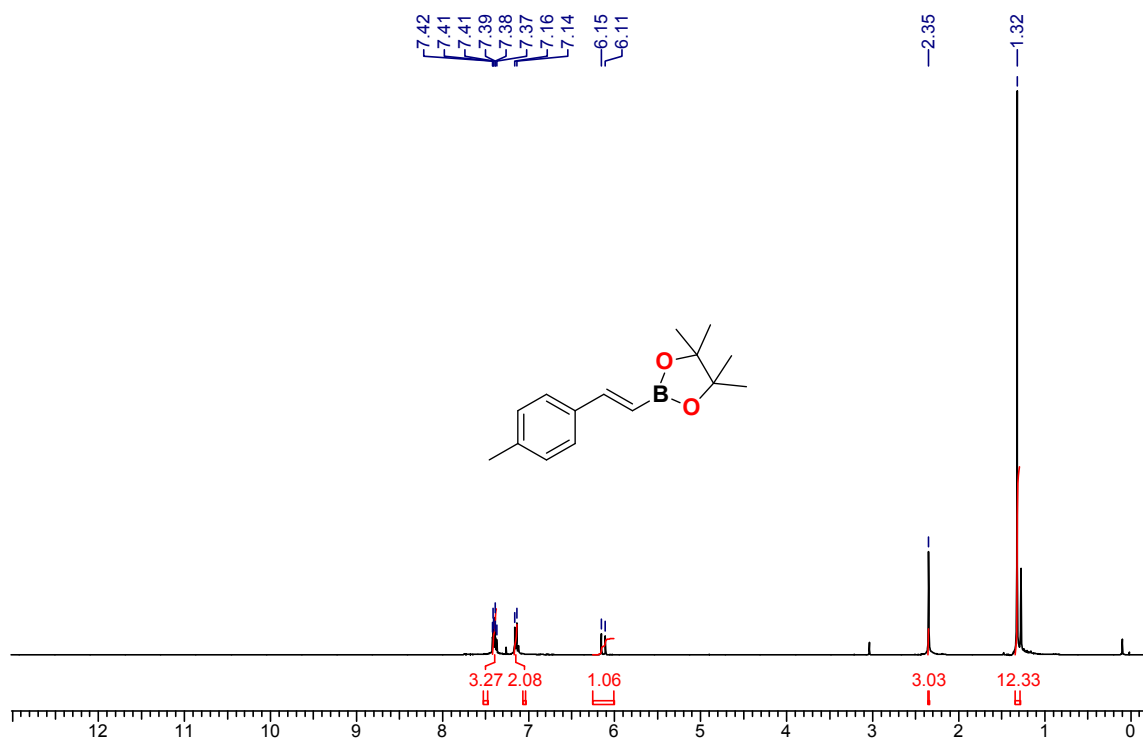

Figure FS56.  $^1\text{H}$  NMR (400 MHz,  $\text{CDCl}_3$ ) spectrum of 3b.

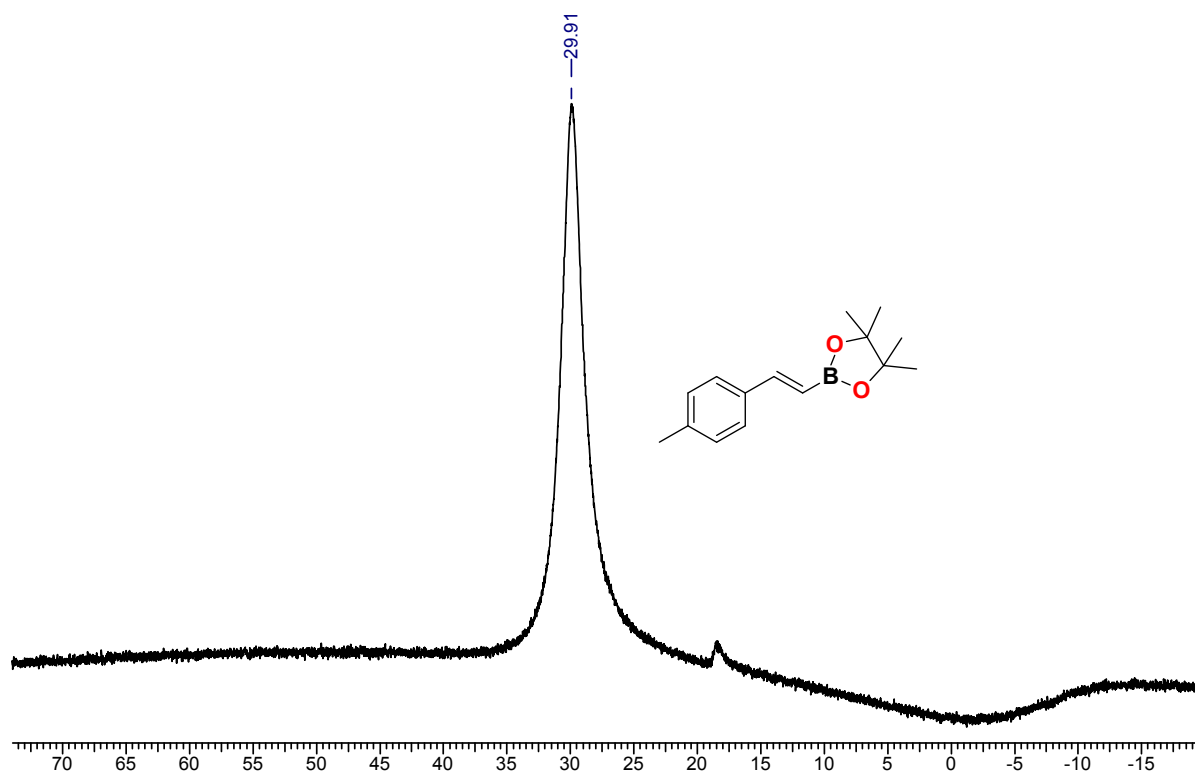

Figure FS57.  $^{11}\text{B}\{^1\text{H}\}$  NMR (128 MHz,  $\text{CDCl}_3$ ) spectrum of **3b**.

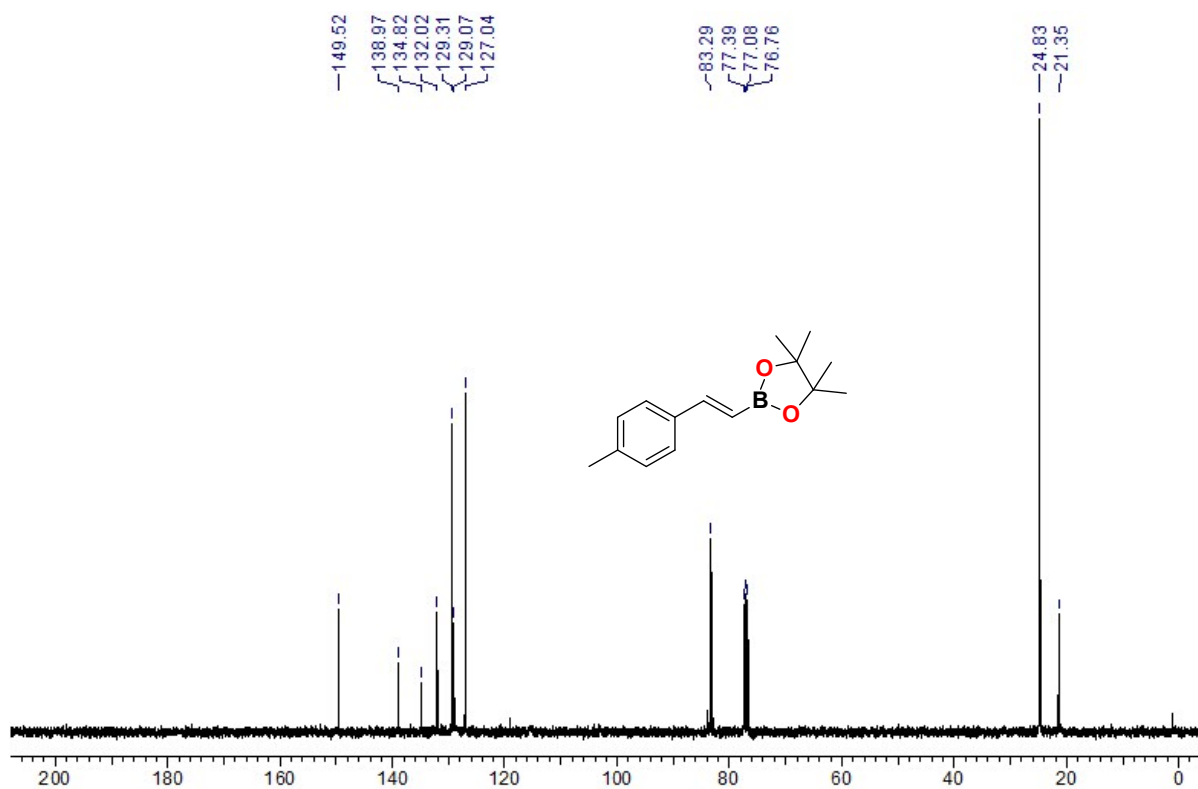

Figure FS58.  $^{13}\text{C}\{^1\text{H}\}$  NMR (100 MHz,  $\text{CDCl}_3$ ) spectrum of **3b**.

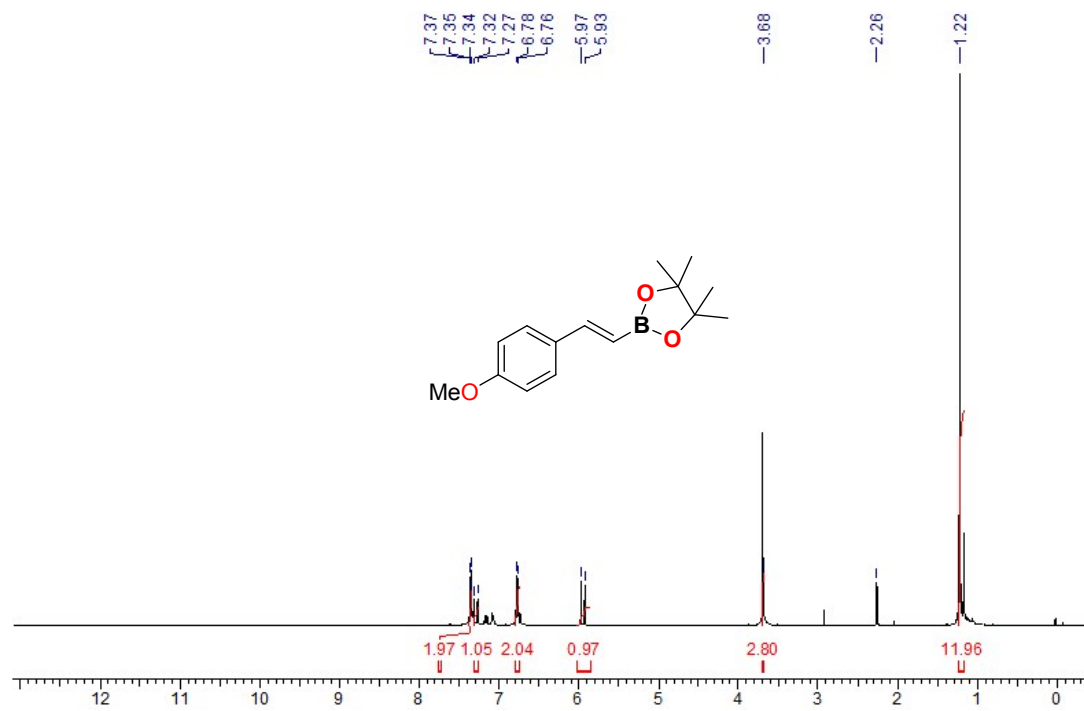

**Figure FS59.**  $^1\text{H}$  NMR (400 MHz,  $\text{CDCl}_3$ ) spectrum of **3c**.

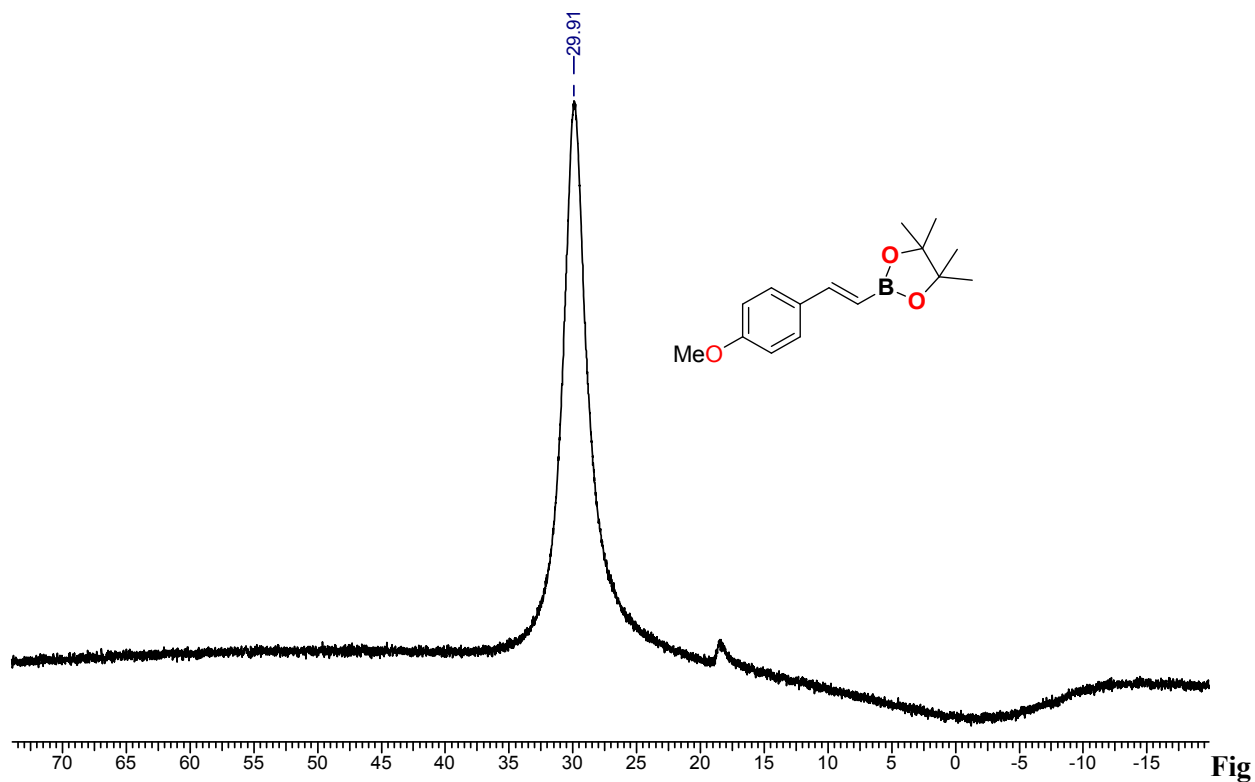

**Figure FS60.**  $^{11}\text{B}\{^1\text{H}\}$  NMR (128 MHz,  $\text{CDCl}_3$ ) spectrum of **3c**.

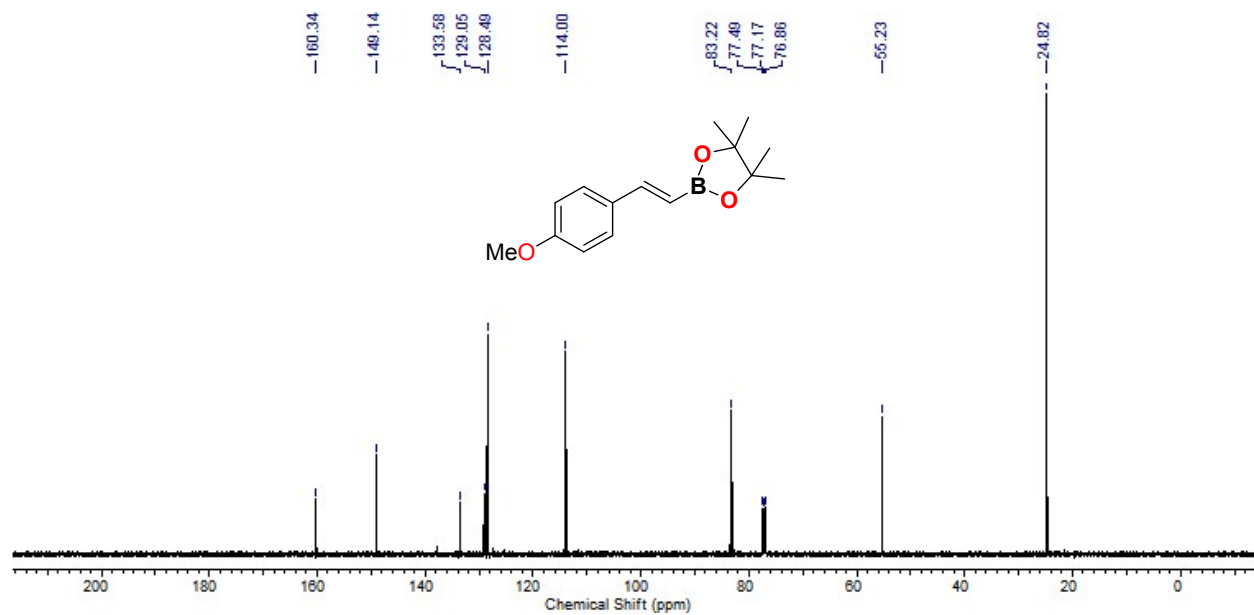

**Figure FS61.**  $^{13}\text{C}\{^1\text{H}\}$  NMR (100 MHz,  $\text{CDCl}_3$ ) spectrum of **3c**.

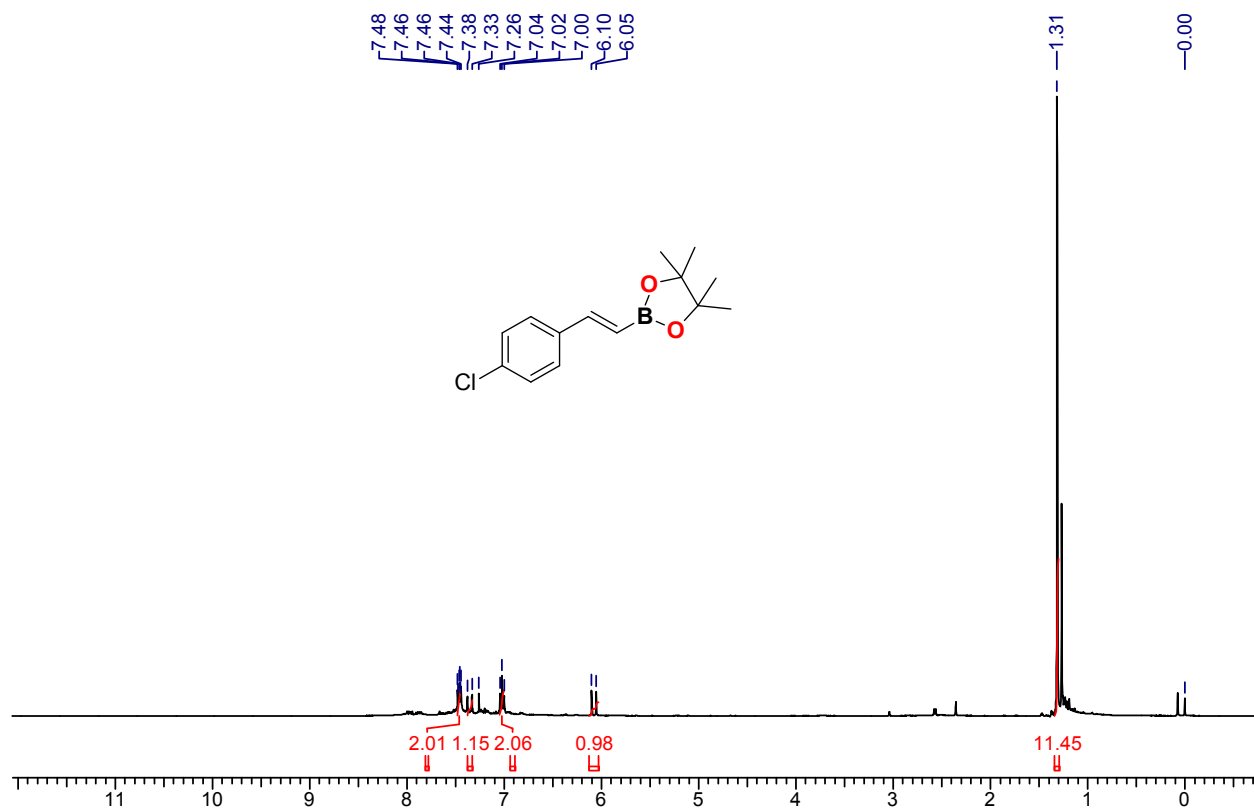

**Figure FS62.**  $^1\text{H}$  NMR (400 MHz,  $\text{CDCl}_3$ ) spectrum of **3d**.

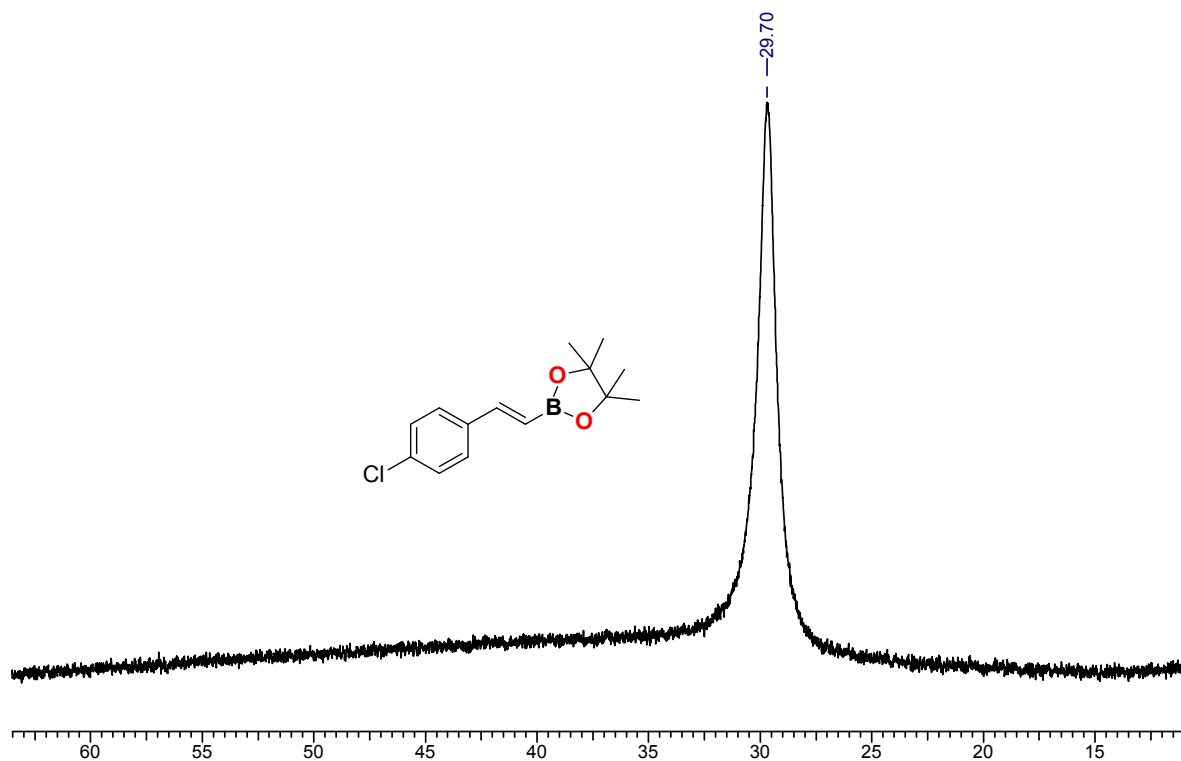

Figure FS63.  $^{11}\text{B}\{^1\text{H}\}$  NMR (128 MHz,  $\text{CDCl}_3$ ) spectrum of 3d.

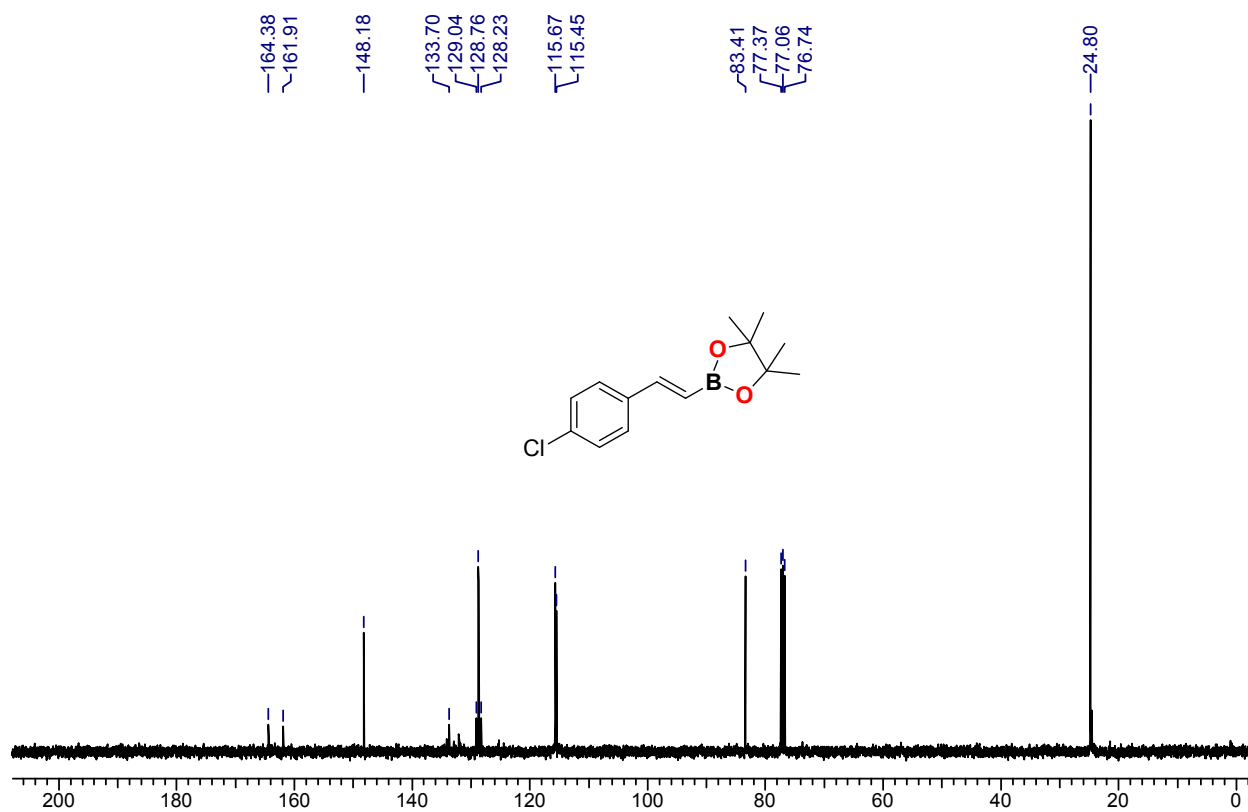

Figure FS64.  $^{13}\text{C}\{^1\text{H}\}$  NMR (100 MHz,  $\text{CDCl}_3$ ) spectrum of 3d.

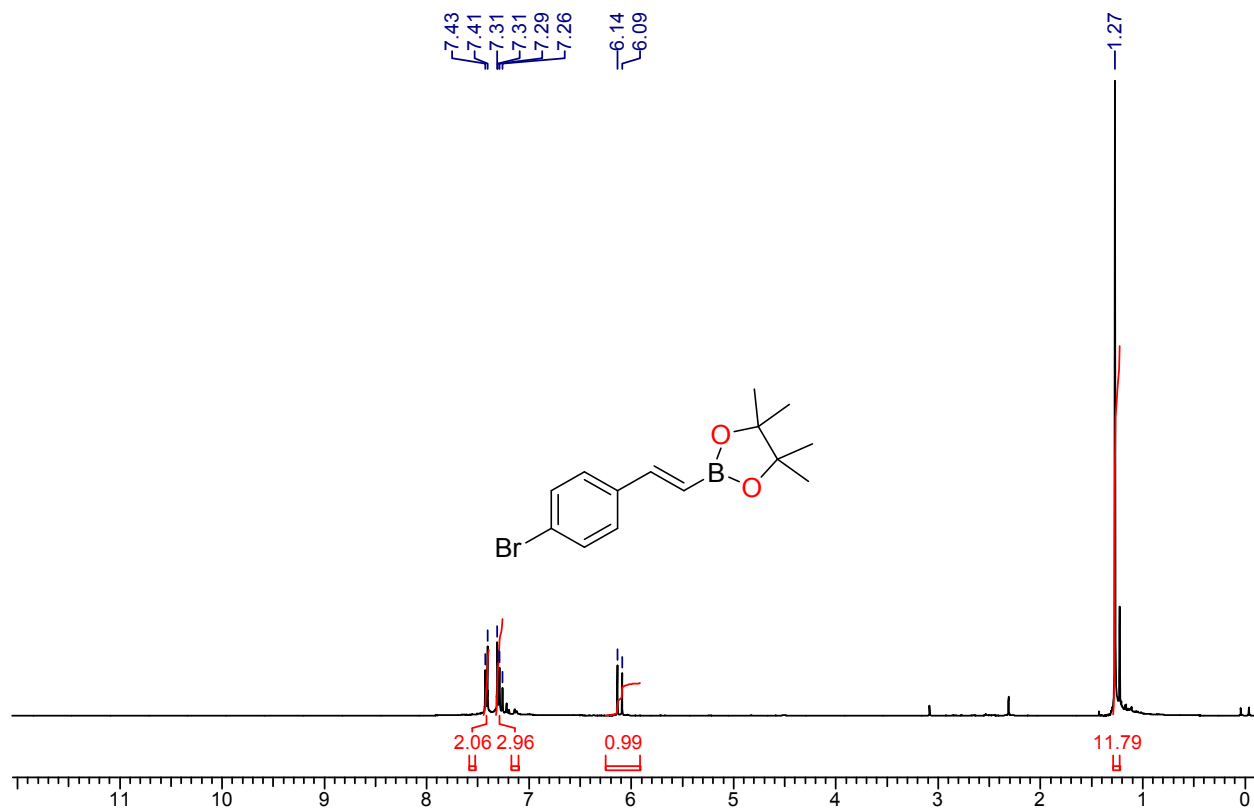

Figure FS65.  $^1\text{H}$  NMR (400 MHz,  $\text{CDCl}_3$ ) spectrum of **3e**.

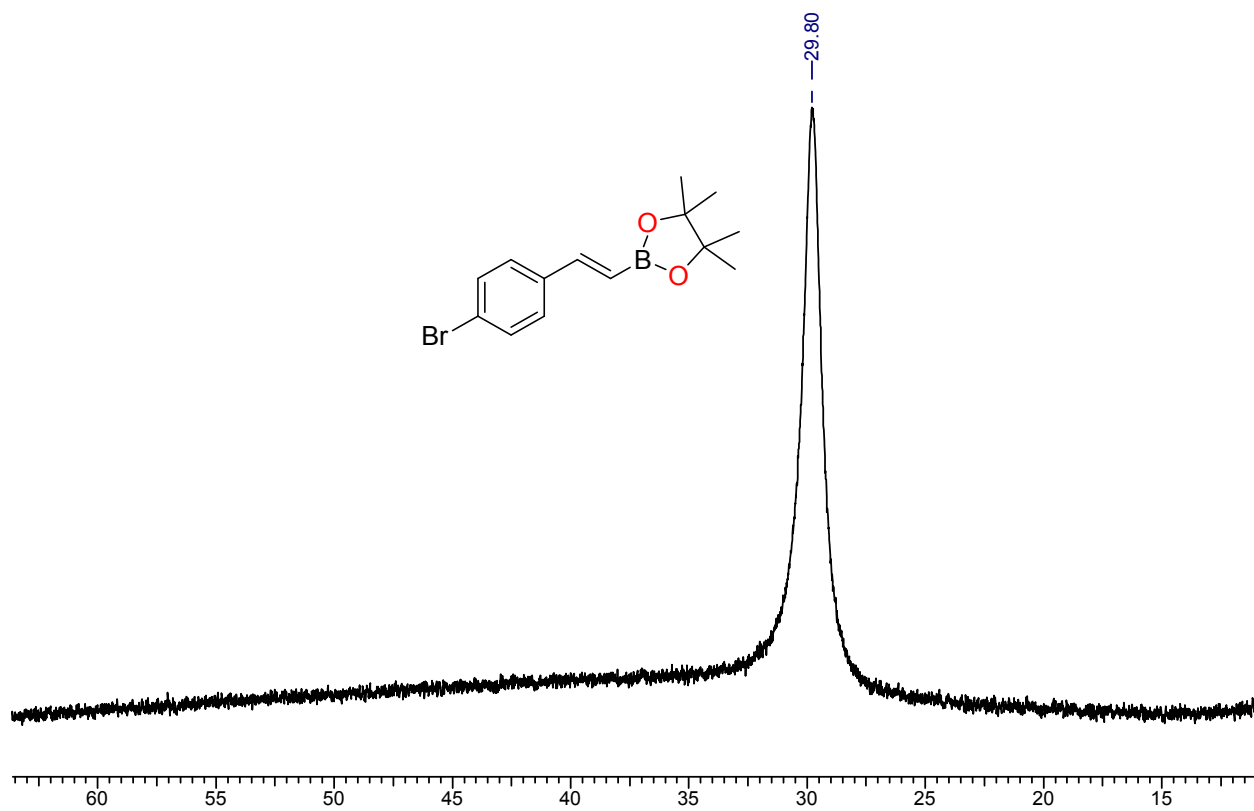

Figure FS66.  $^{11}\text{B}\{^1\text{H}\}$  NMR (128 MHz,  $\text{CDCl}_3$ ) spectrum of **3e**.

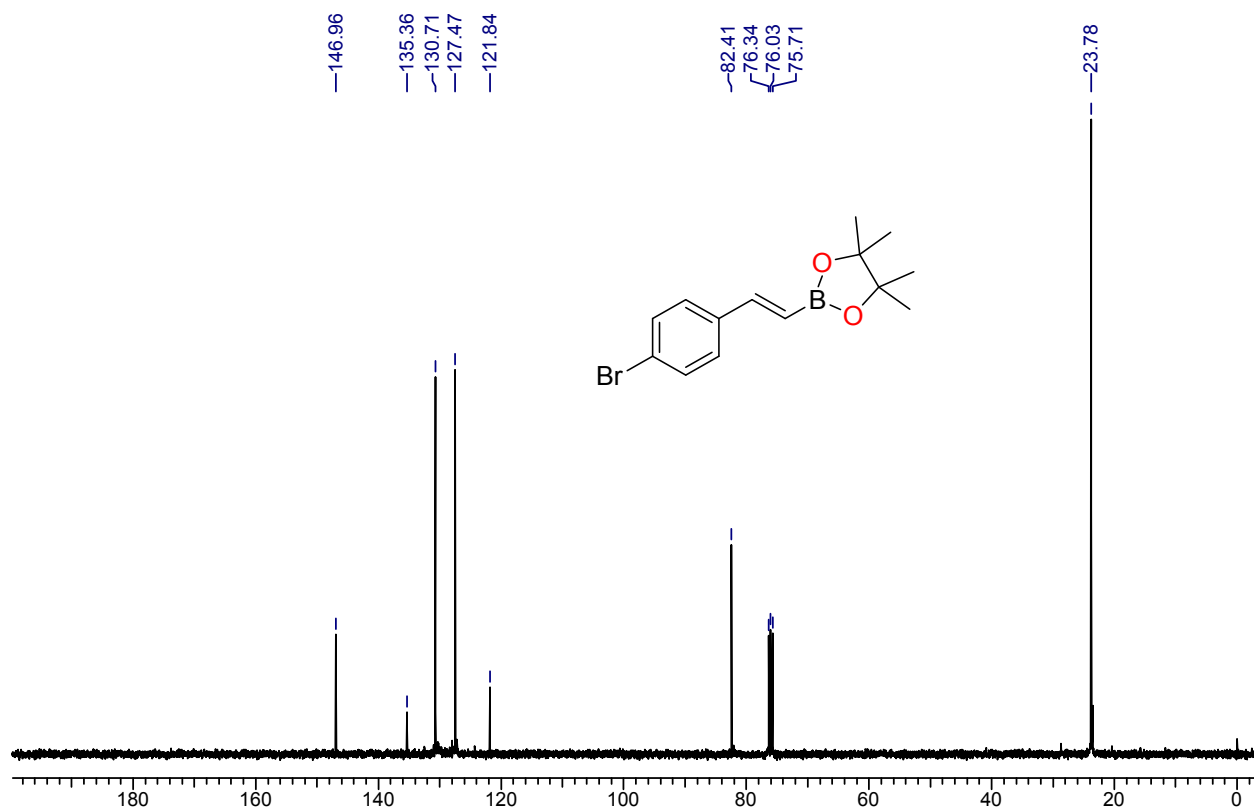

Figure FS67.  $^{13}\text{C}\{^1\text{H}\}$  NMR (100 MHz,  $\text{CDCl}_3$ ) spectrum of **3e**.



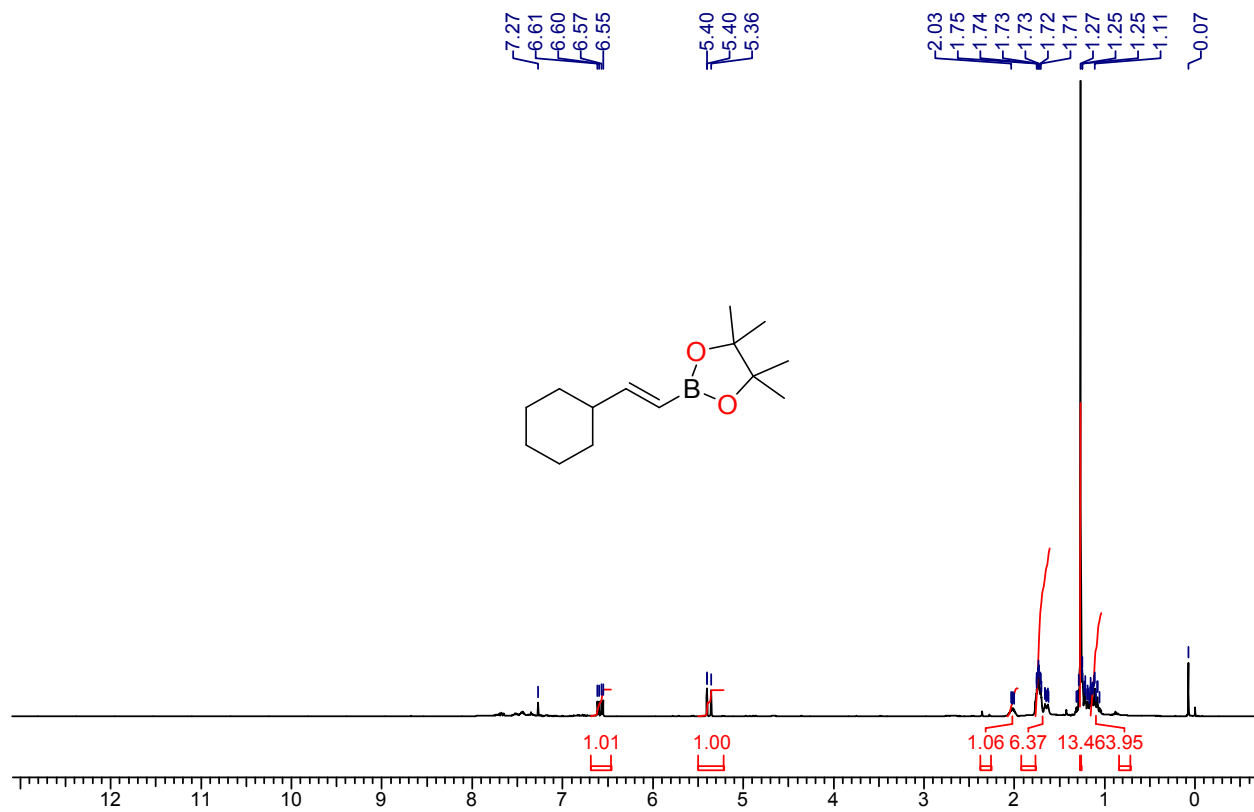

Figure FS68.  $^1\text{H}$  NMR (400 MHz,  $\text{CDCl}_3$ ) spectrum of **3f**.

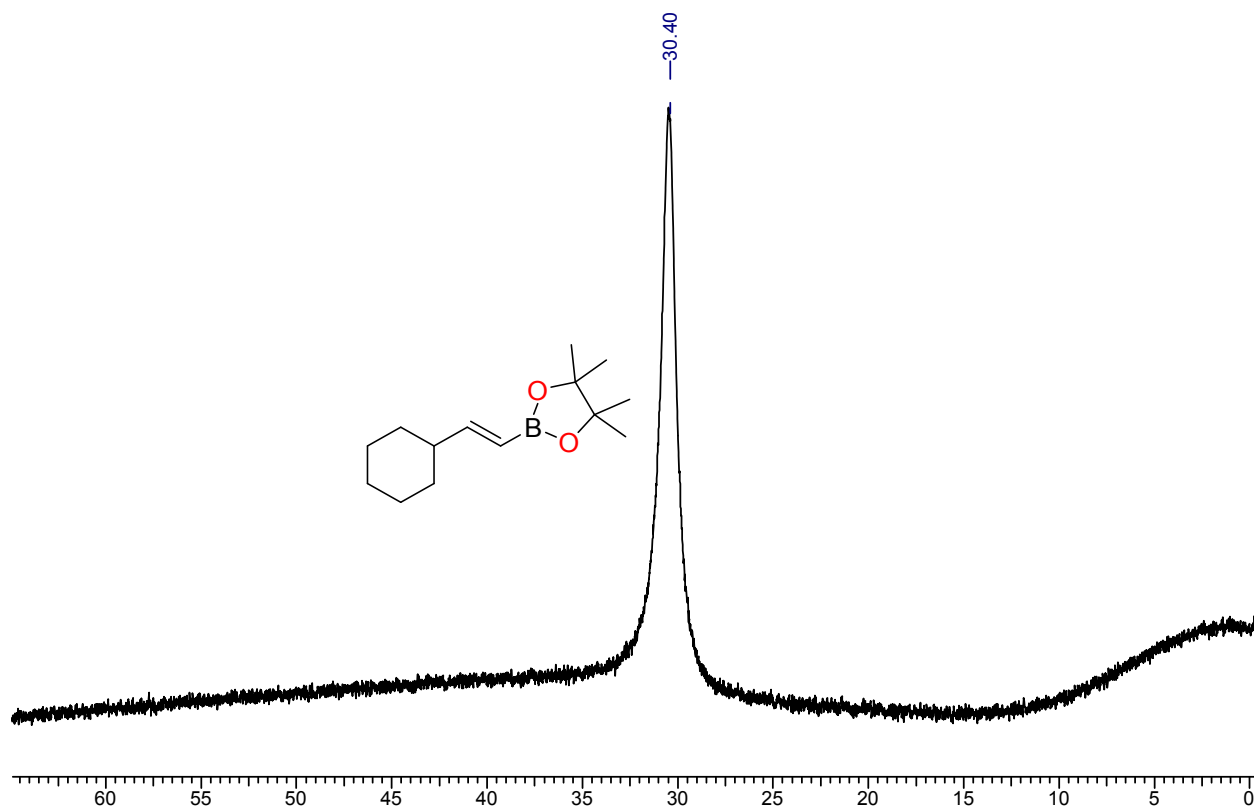

Figure FS69.  $^{11}\text{B}\{^1\text{H}\}$  NMR (128 MHz,  $\text{CDCl}_3$ ) spectrum of **3f**.

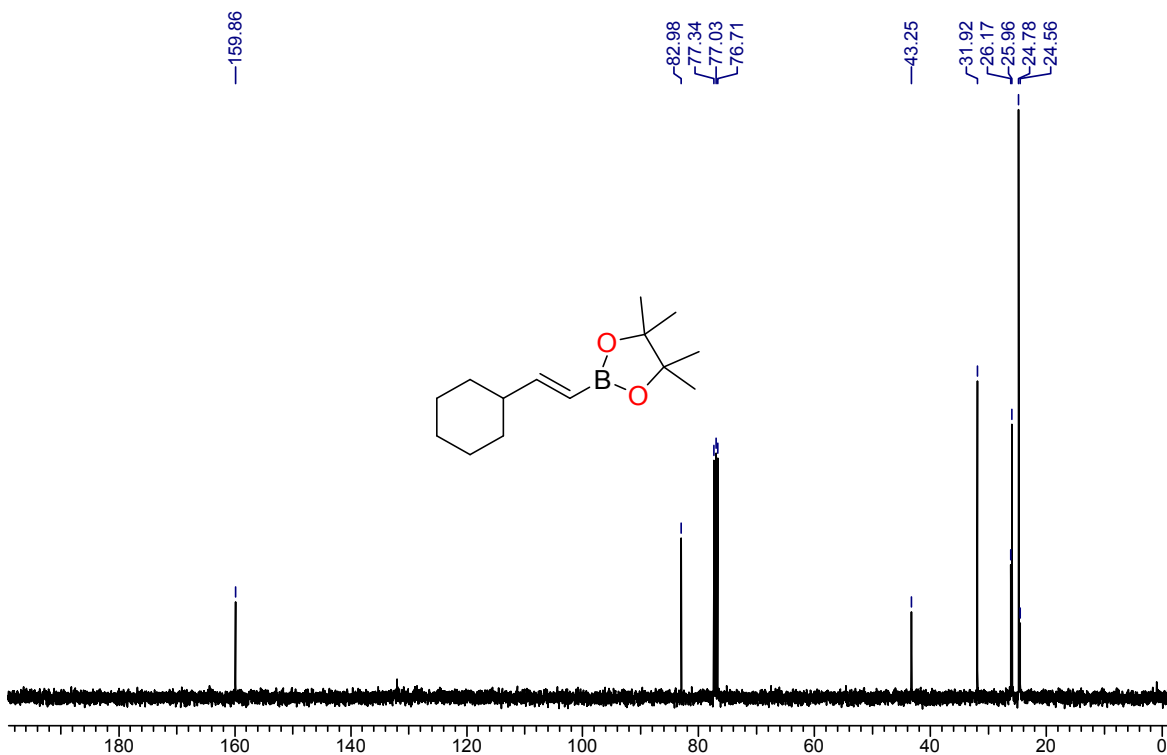

Figure FS70.  $^{13}\text{C}\{^1\text{H}\}$  NMR (100 MHz,  $\text{CDCl}_3$ ) spectrum of **3f**.

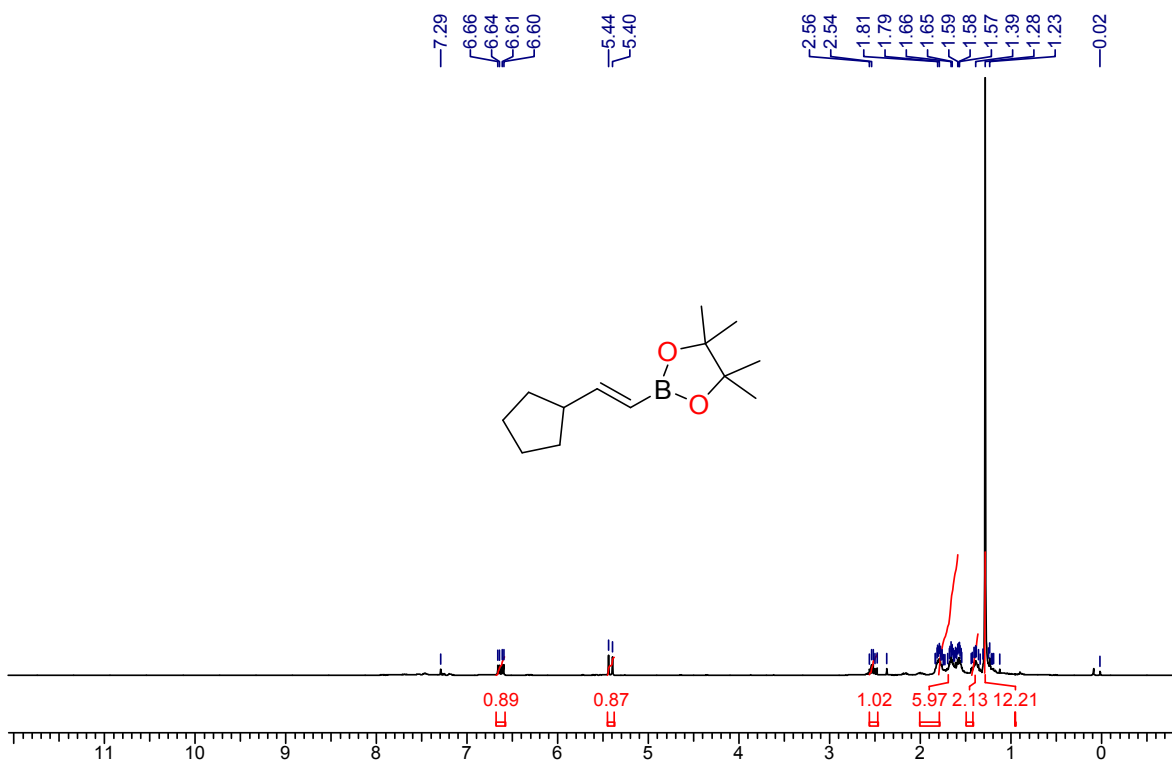

Figure FS71.  $^1\text{H}$  NMR (400 MHz,  $\text{CDCl}_3$ ) spectrum of **3g**.

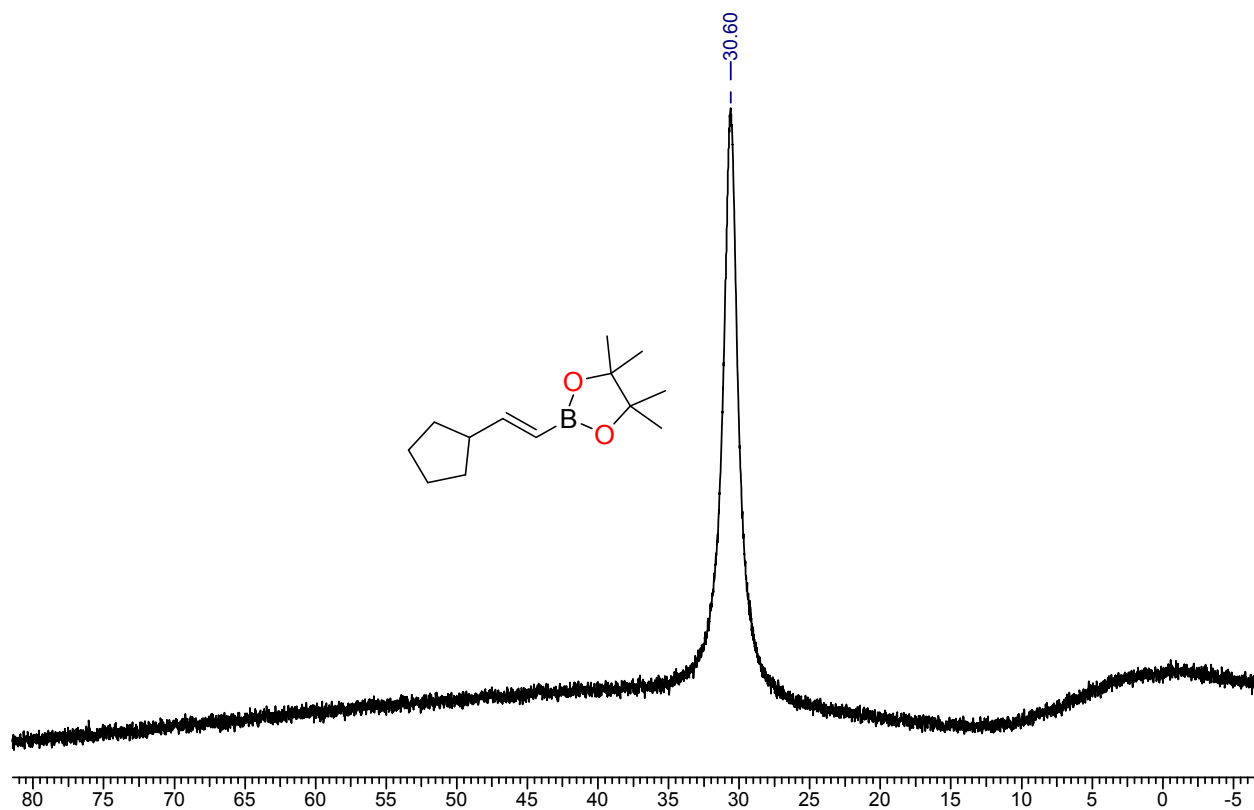

Figure FS72.  $^{11}\text{B}\{^1\text{H}\}$  NMR (128 MHz,  $\text{CDCl}_3$ ) spectrum of **3g**.

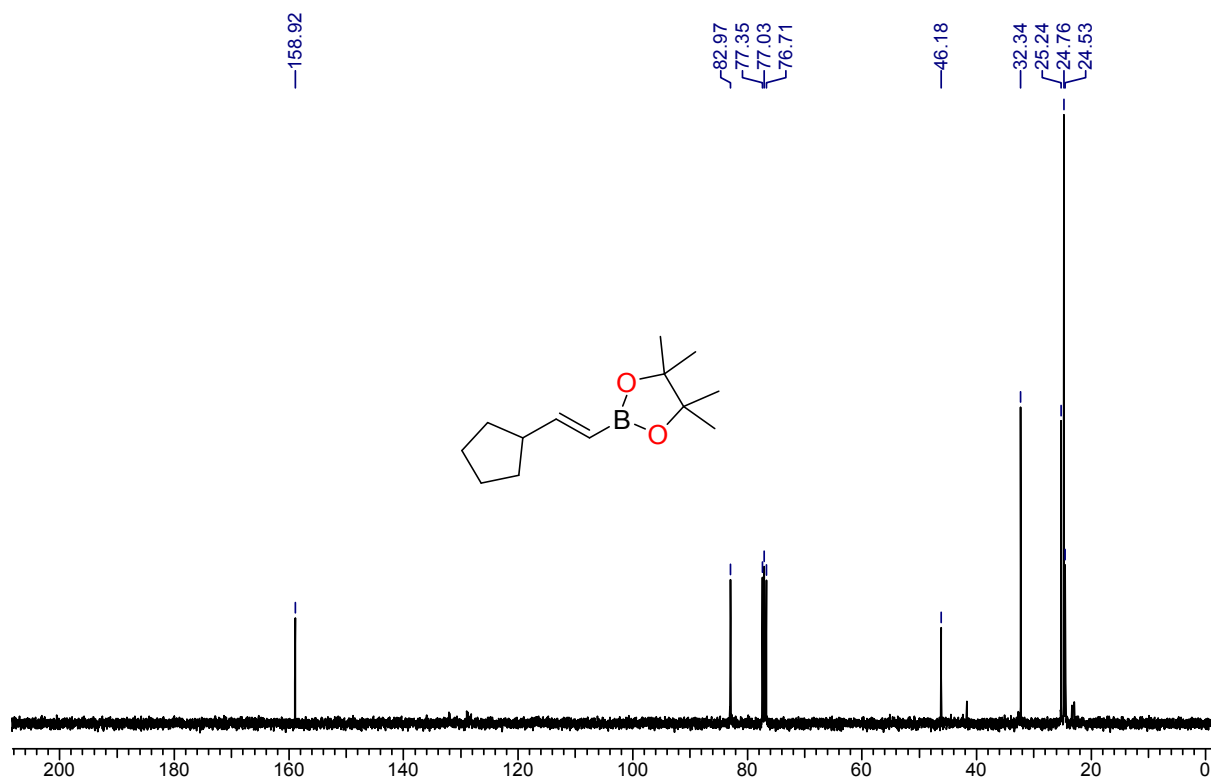

Figure FS73.  $^{13}\text{C}\{^1\text{H}\}$  NMR (100 MHz,  $\text{CDCl}_3$ ) spectrum of **3g**.

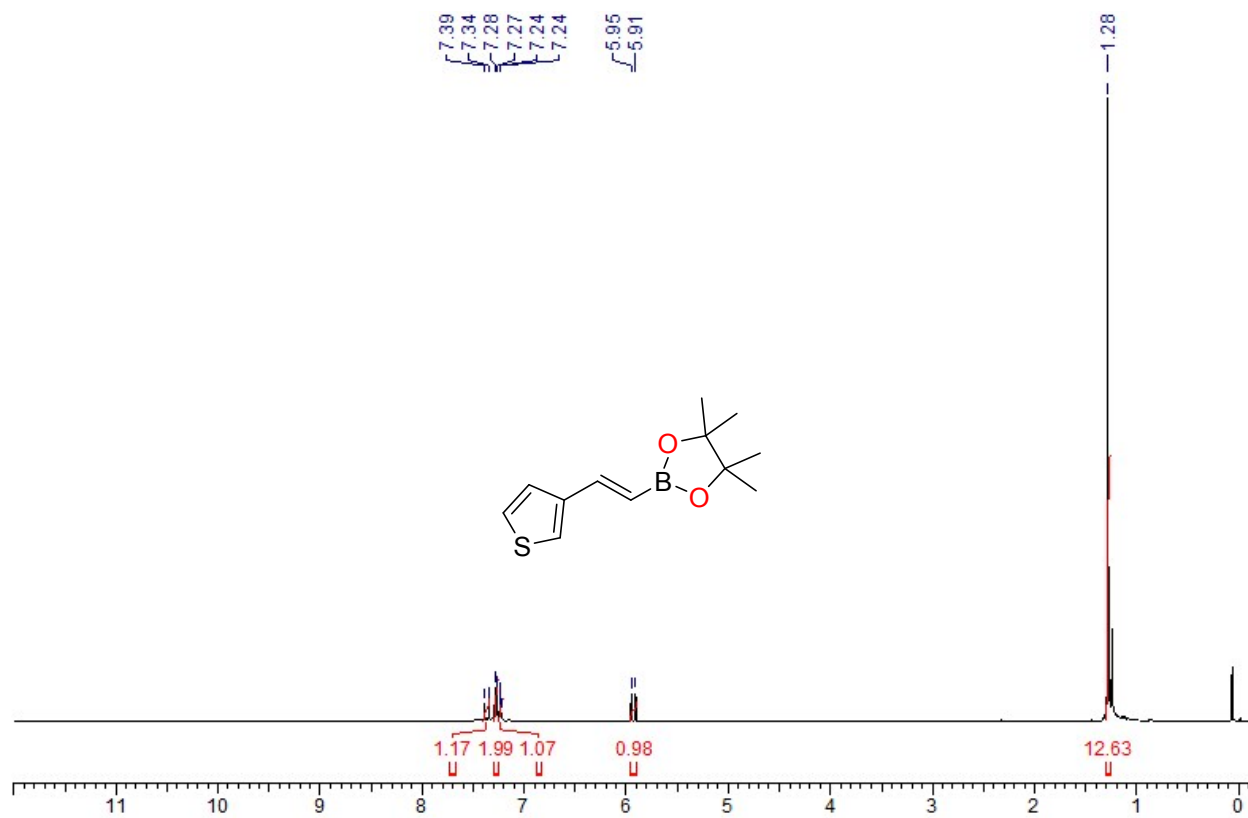

**Figure FS74.**  $^1\text{H}$  NMR (400 MHz,  $\text{CDCl}_3$ ) spectrum of **3h**.

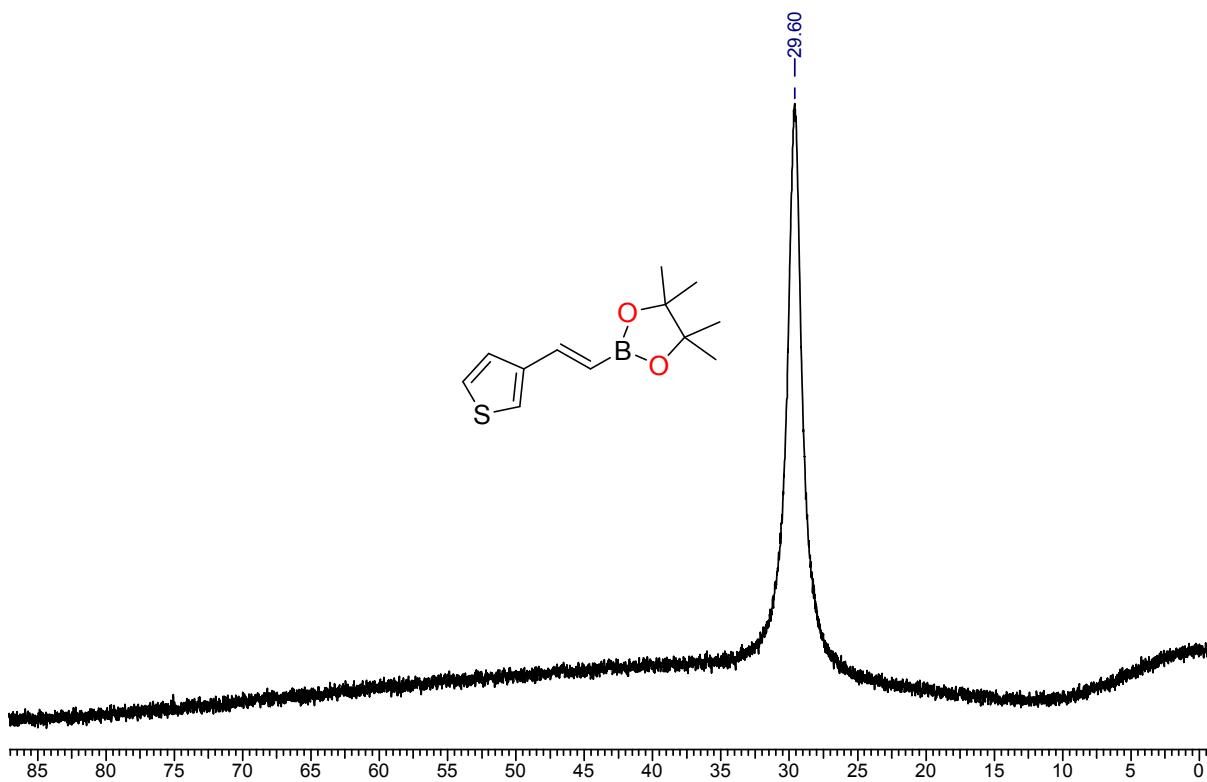

**Figure FS75.**  $^{11}\text{B}\{^1\text{H}\}$  NMR (128 MHz,  $\text{CDCl}_3$ ) spectrum of **3h**.

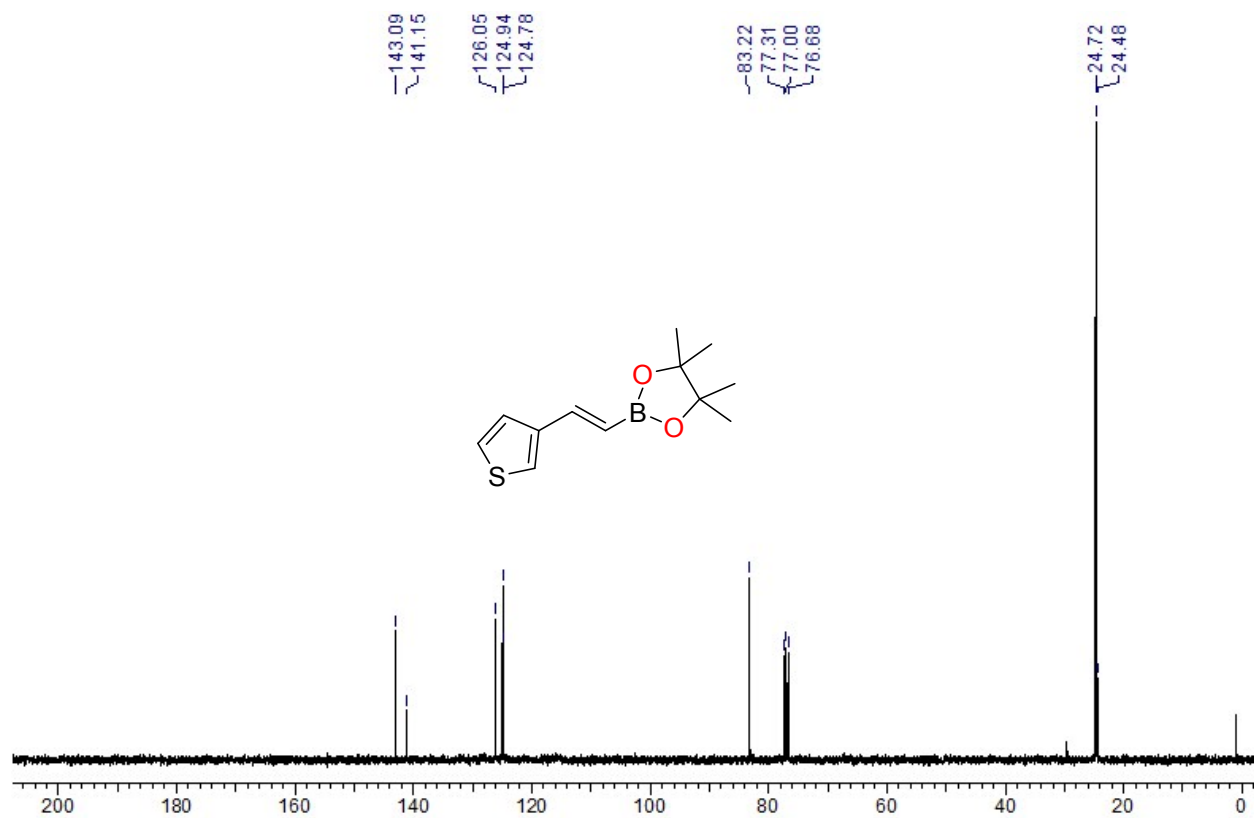

Figure FS76.  $^{13}\text{C}\{^1\text{H}\}$  NMR (100 MHz,  $\text{CDCl}_3$ ) spectrum of **3h**.

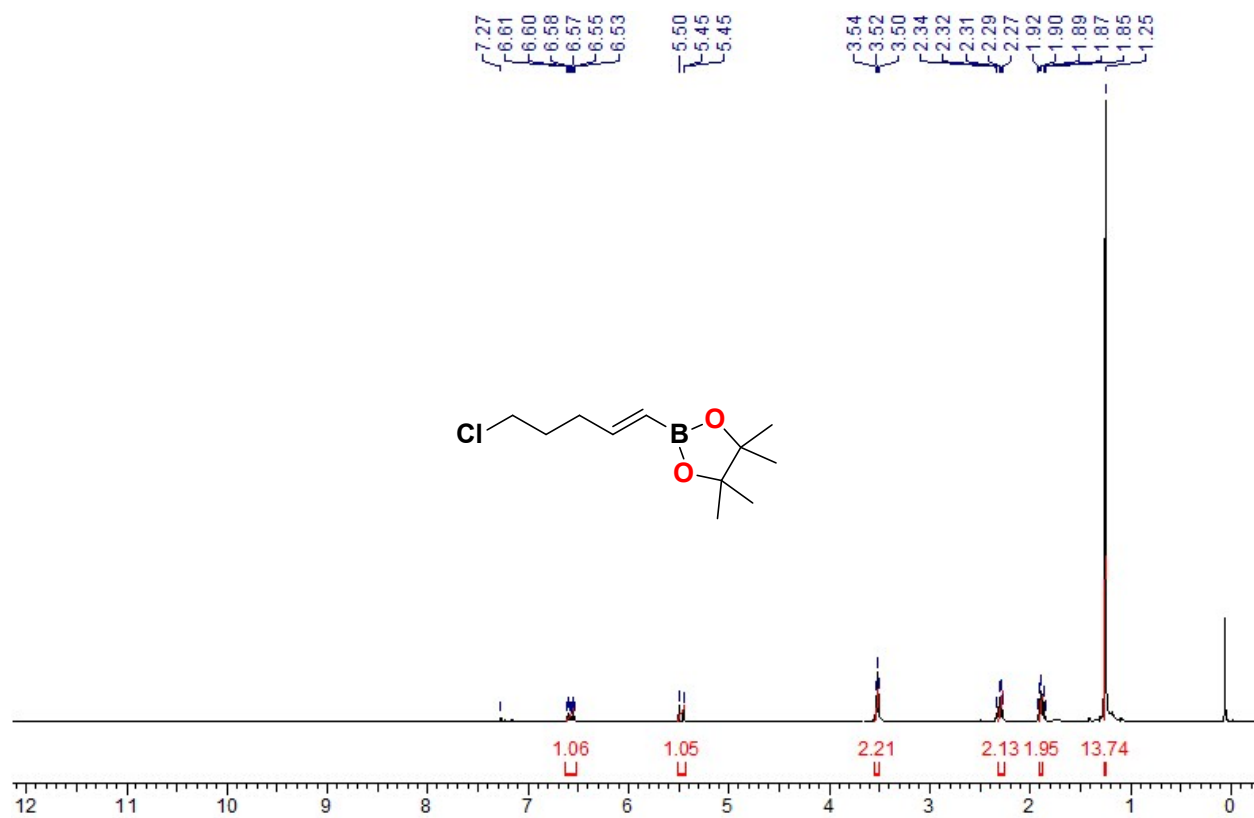

Figure FS77.  $^1\text{H}$  NMR (400 MHz,  $\text{CDCl}_3$ ) spectrum of **3i**.

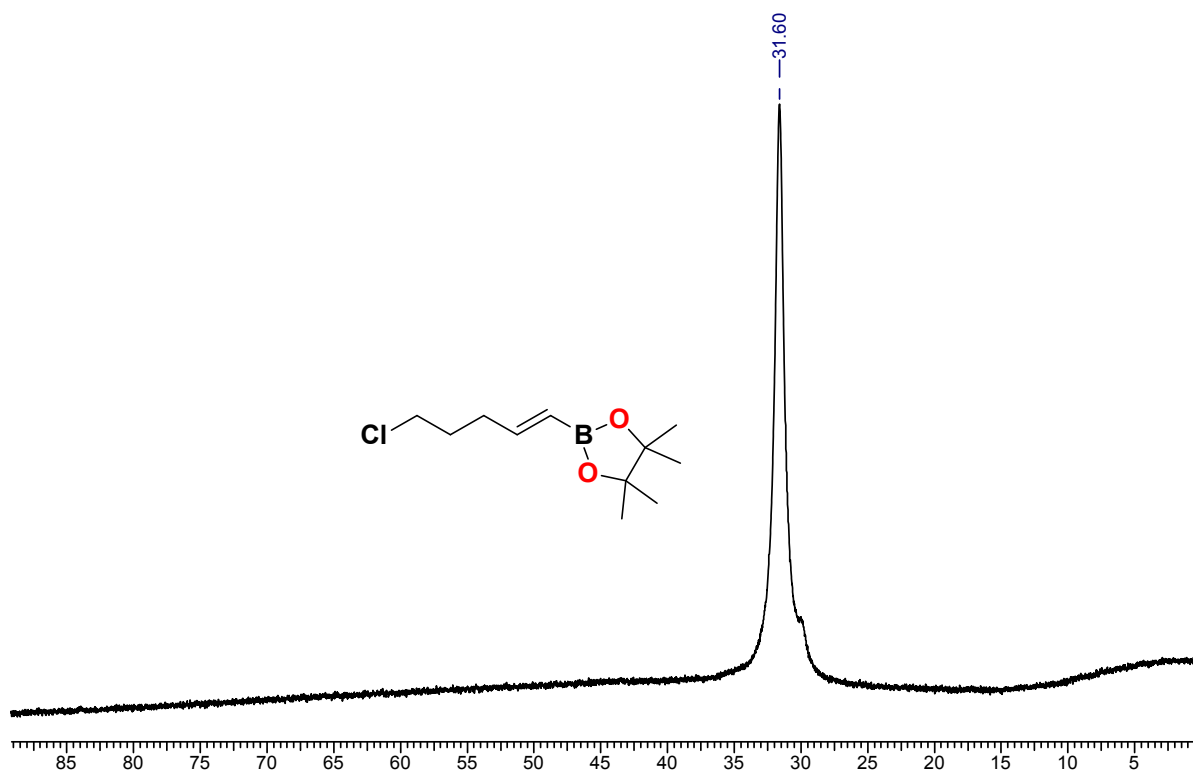

Figure FS78.  $^{11}\text{B}\{^1\text{H}\}$  NMR (128 MHz,  $\text{CDCl}_3$ ) spectrum of **3i**.

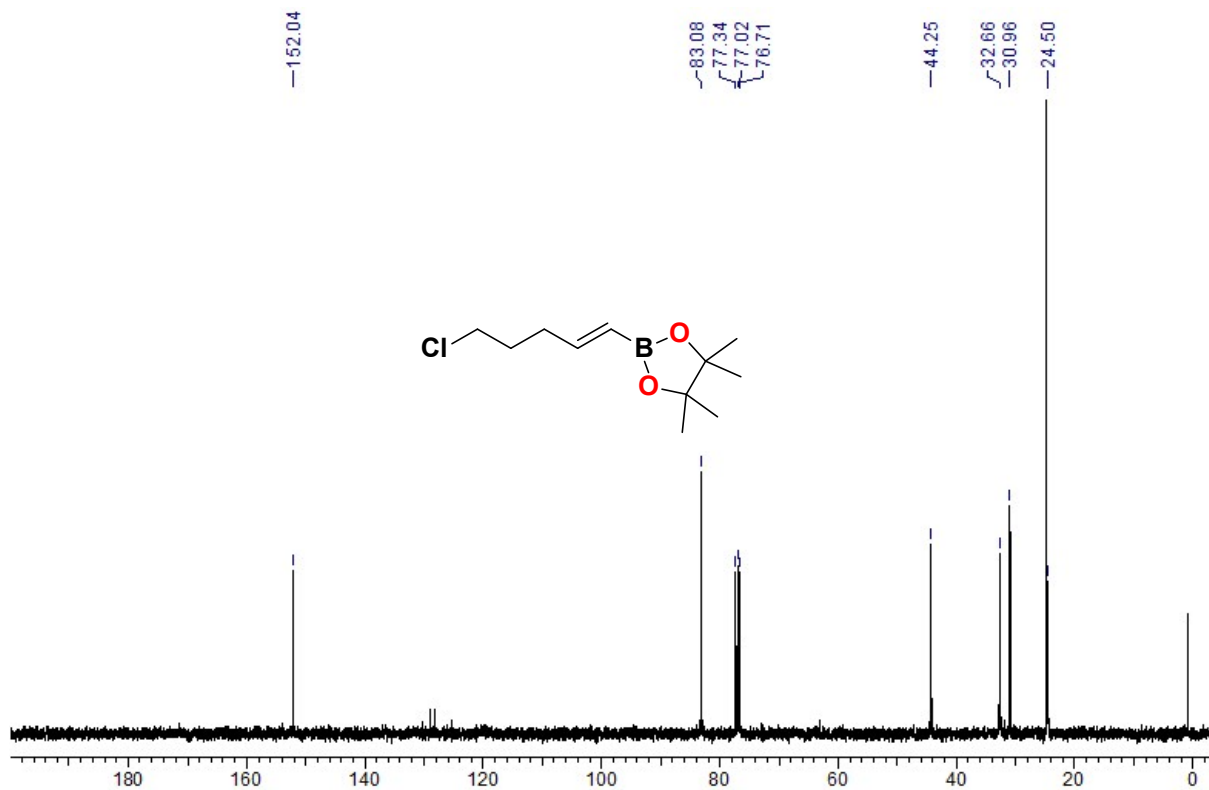

**Figure FS79.**  $^{13}\text{C}\{^1\text{H}\}$  NMR (100 MHz,  $\text{CDCl}_3$ ) spectrum of **3i**.

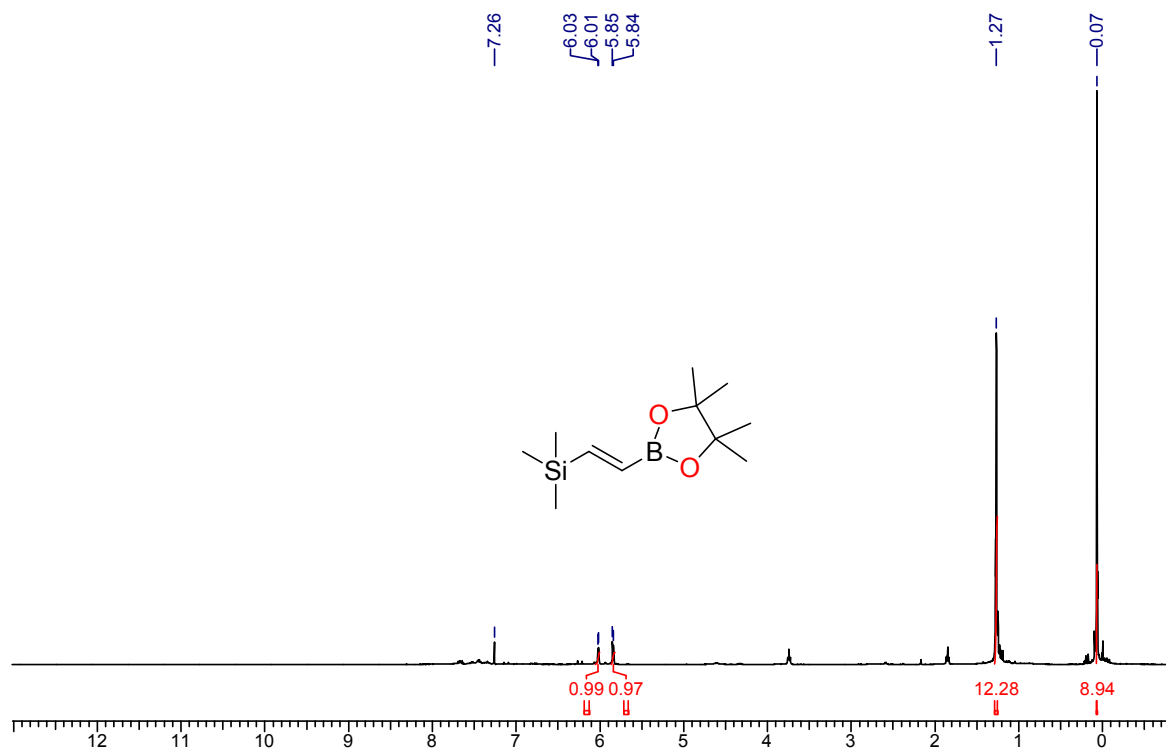

**Figure FS80.**  $^1\text{H}$  NMR (400 MHz,  $\text{CDCl}_3$ ) spectrum of **3j**.

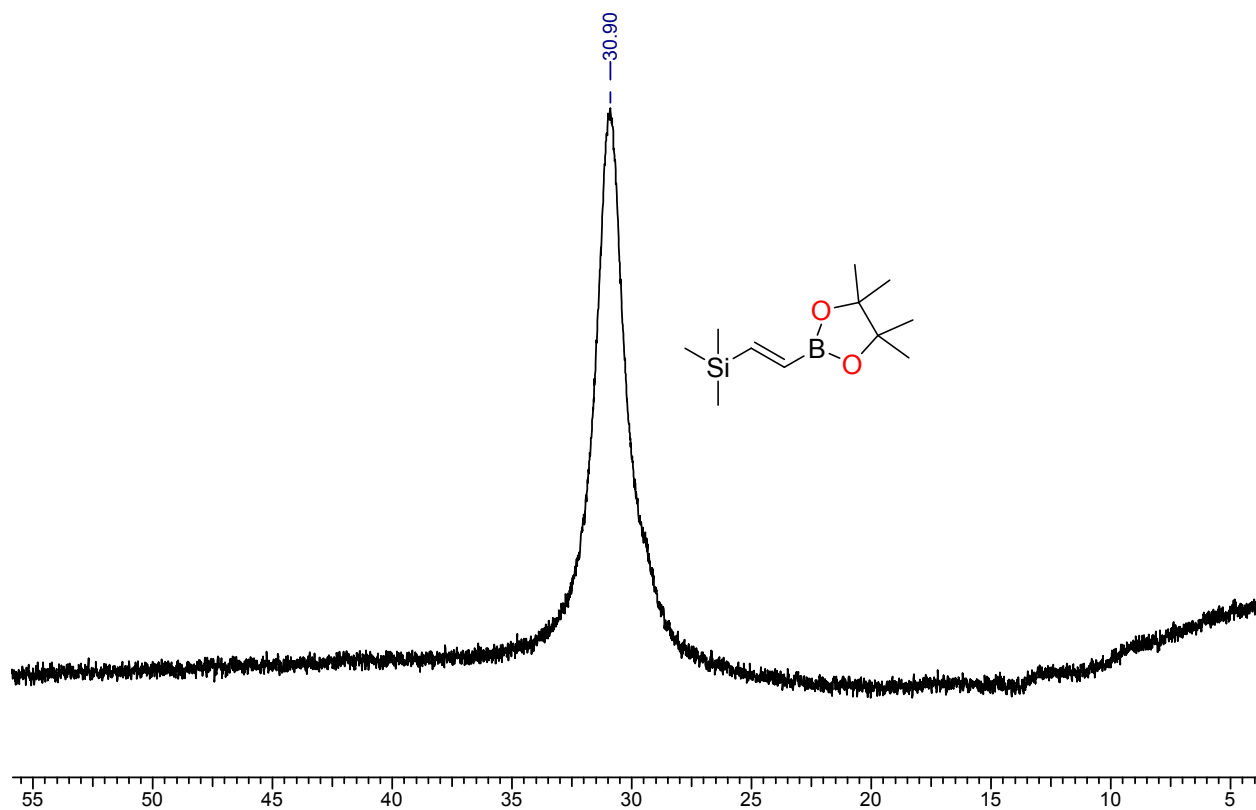

Figure FS81.  $^{11}\text{B}$   $\{^1\text{H}\}$  NMR (128 MHz,  $\text{CDCl}_3$ ) spectrum of **3j**.

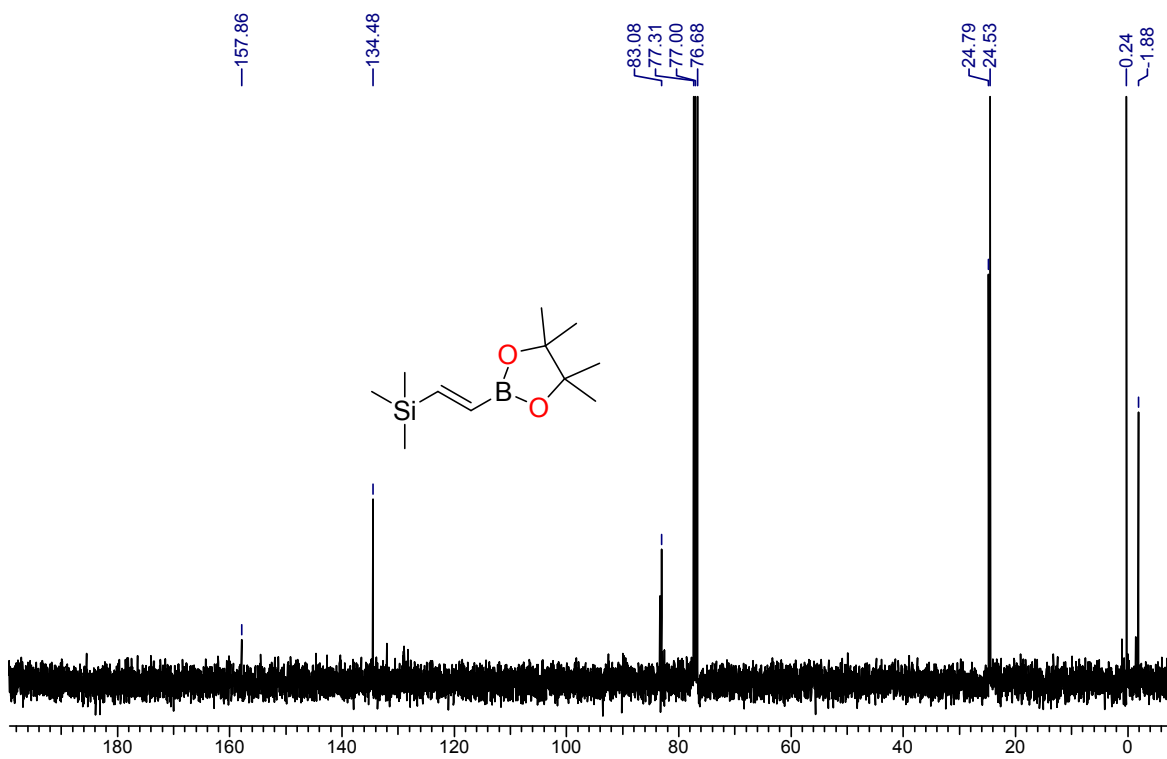

Figure FS82.  $^{13}\text{C}$   $\{^1\text{H}\}$  NMR (100 MHz,  $\text{CDCl}_3$ ) spectrum of **3j**.



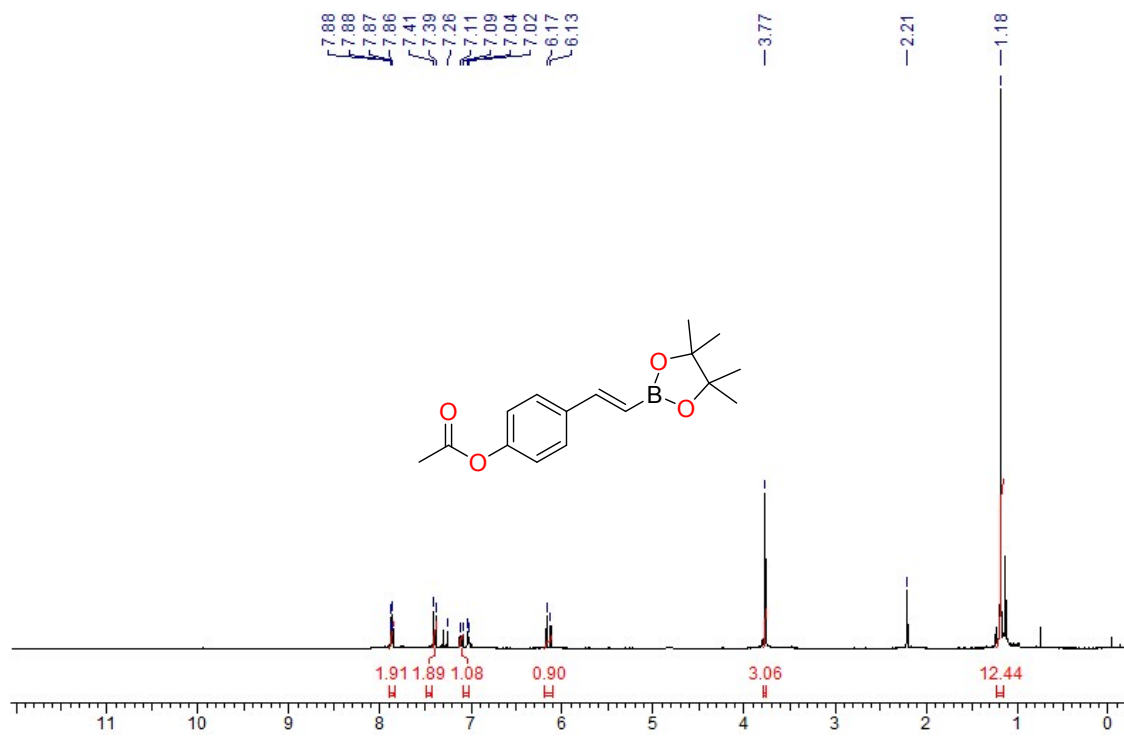

**Figure FS83.**  $^1\text{H}$  NMR (400 MHz,  $\text{CDCl}_3$ ) spectrum of **3k**.

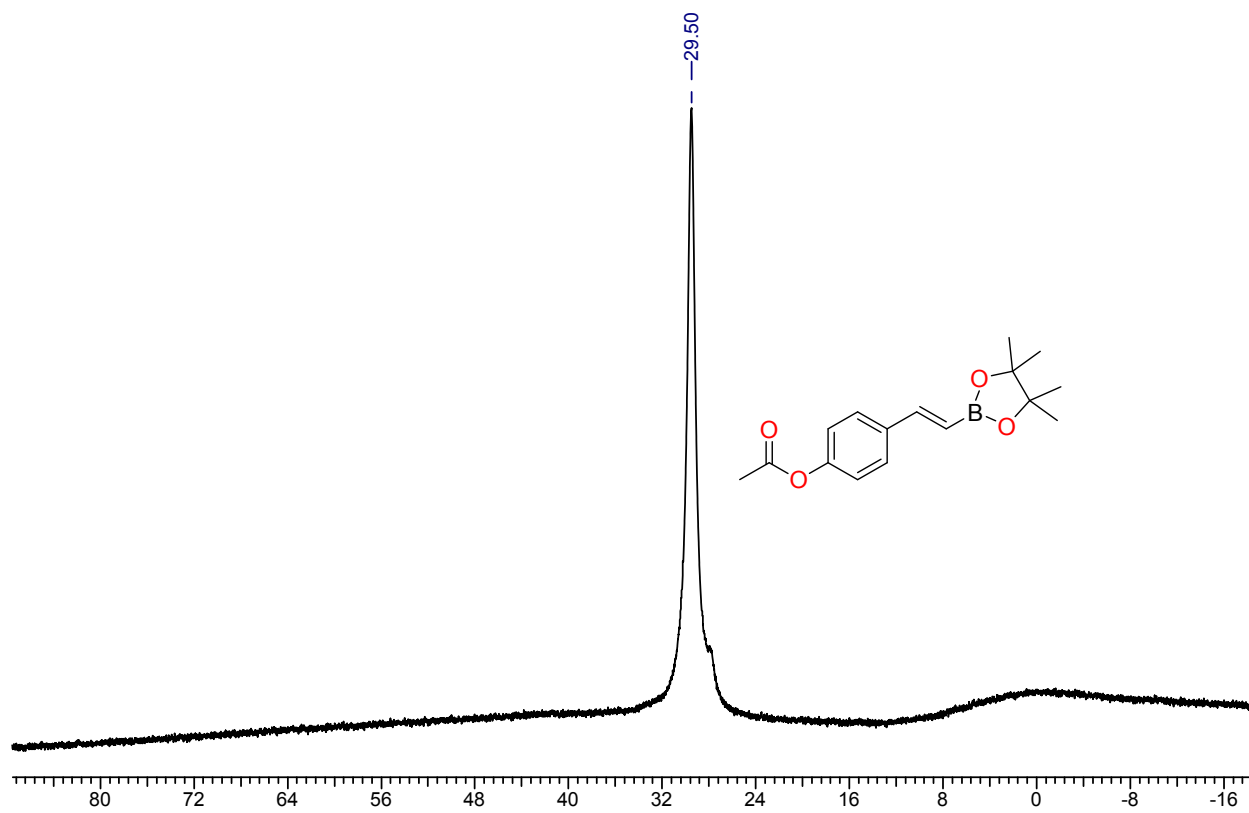

**Figure FS84.**  $^{11}\text{B}\{^1\text{H}\}$  NMR (128 MHz,  $\text{CDCl}_3$ ) spectrum of **3k**.

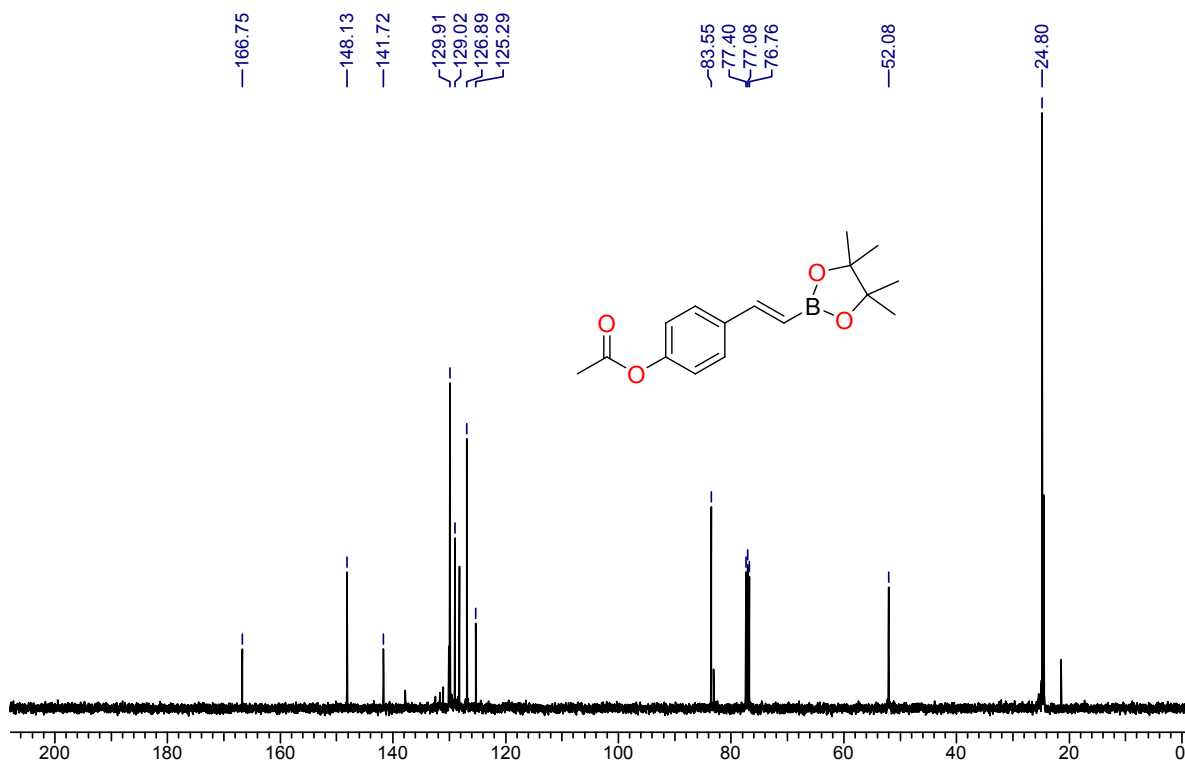

Figure FS85.  $^{13}\text{C}\{^1\text{H}\}$  NMR (100 MHz,  $\text{CDCl}_3$ ) spectrum of **3k**.

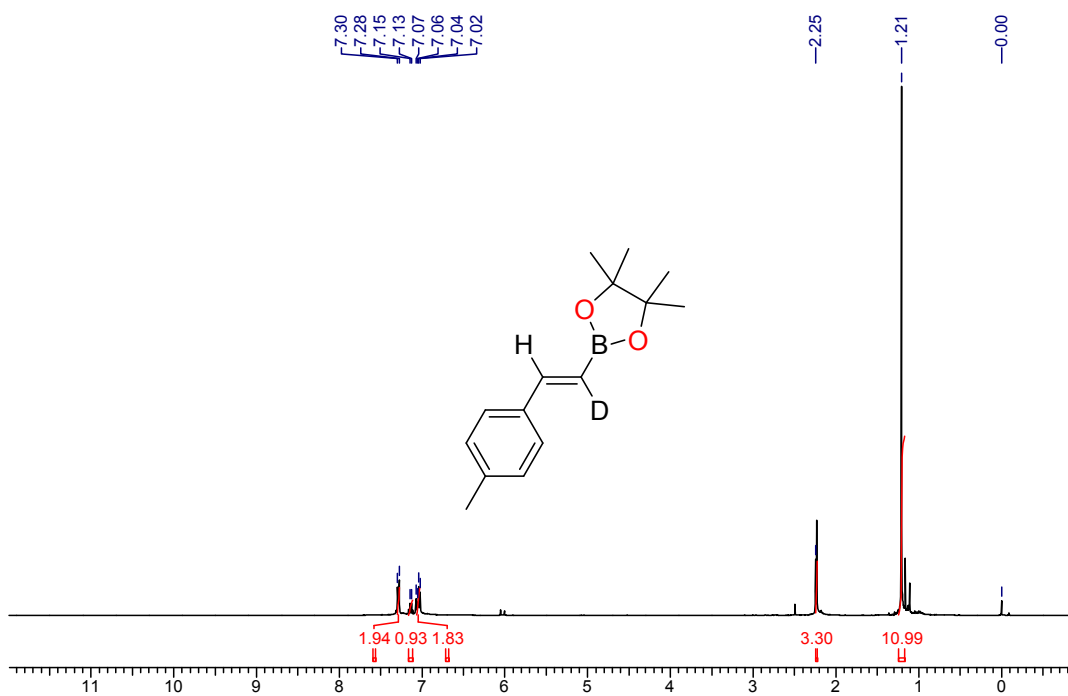

Figure FS86.  $^1\text{H}$  NMR (400 MHz,  $\text{CDCl}_3$ ) spectrum of **4a**.

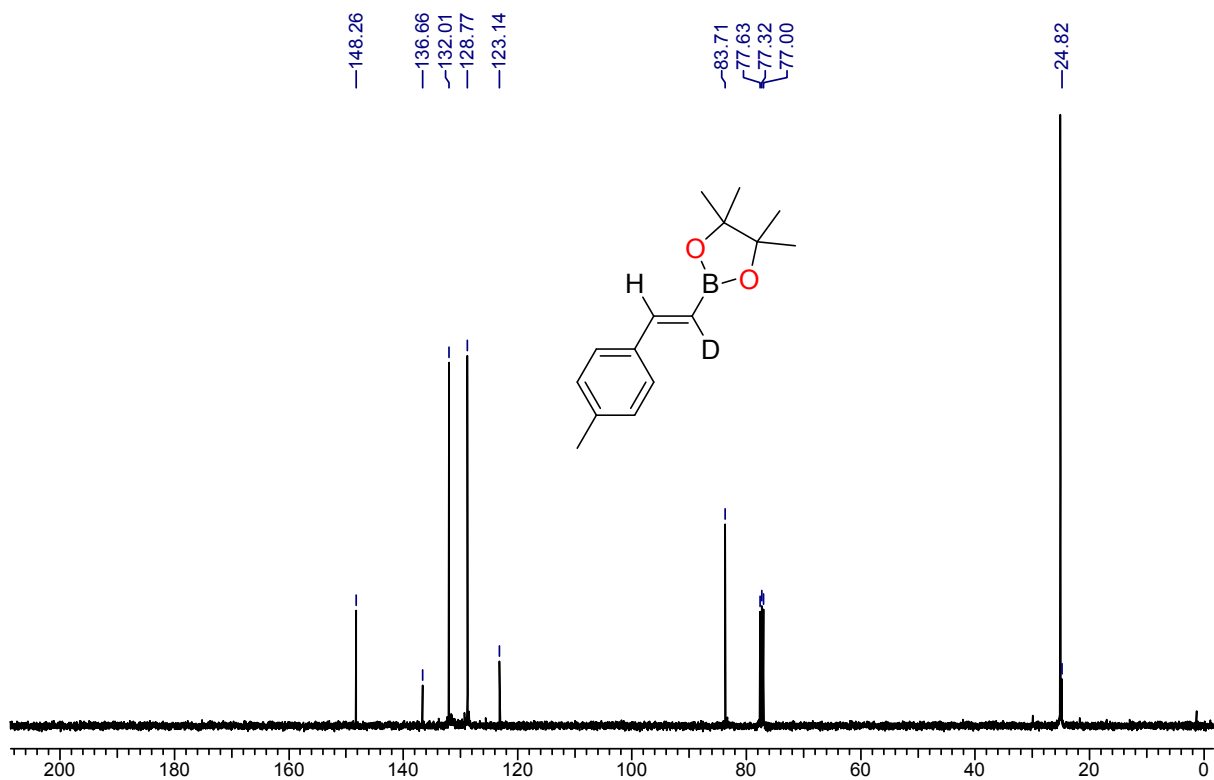

Figure FS87.  $^{13}\text{C}\{^1\text{H}\}$  NMR (100 MHz,  $\text{CDCl}_3$ ) spectrum of 4a.

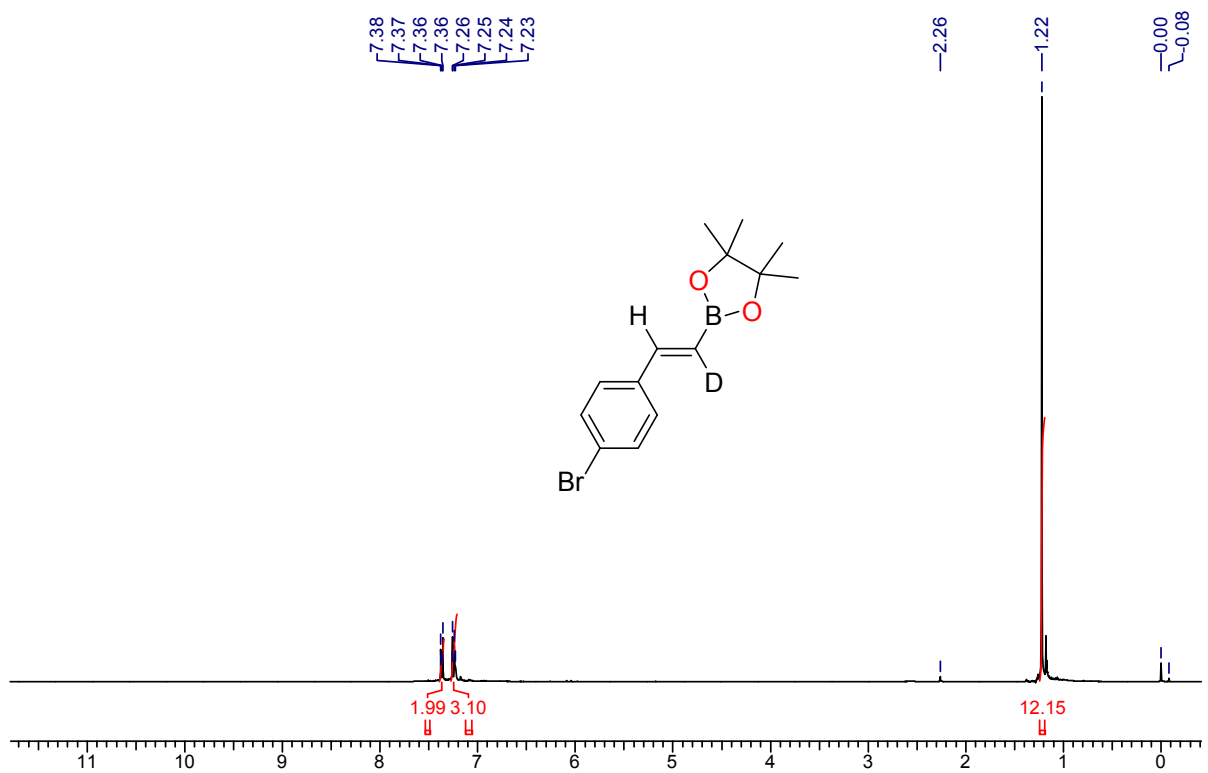

Figure FS88.  $^1\text{H}$  NMR (400 MHz,  $\text{CDCl}_3$ ) spectrum of 4b.

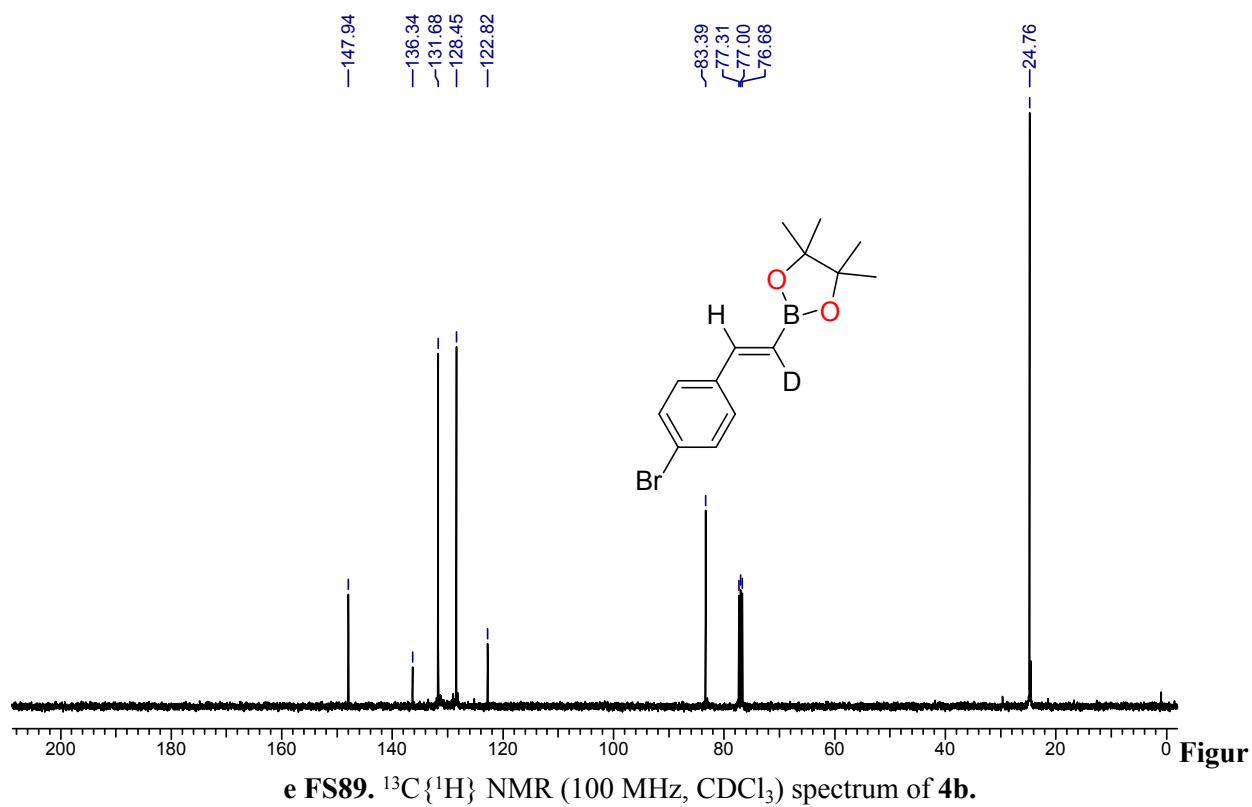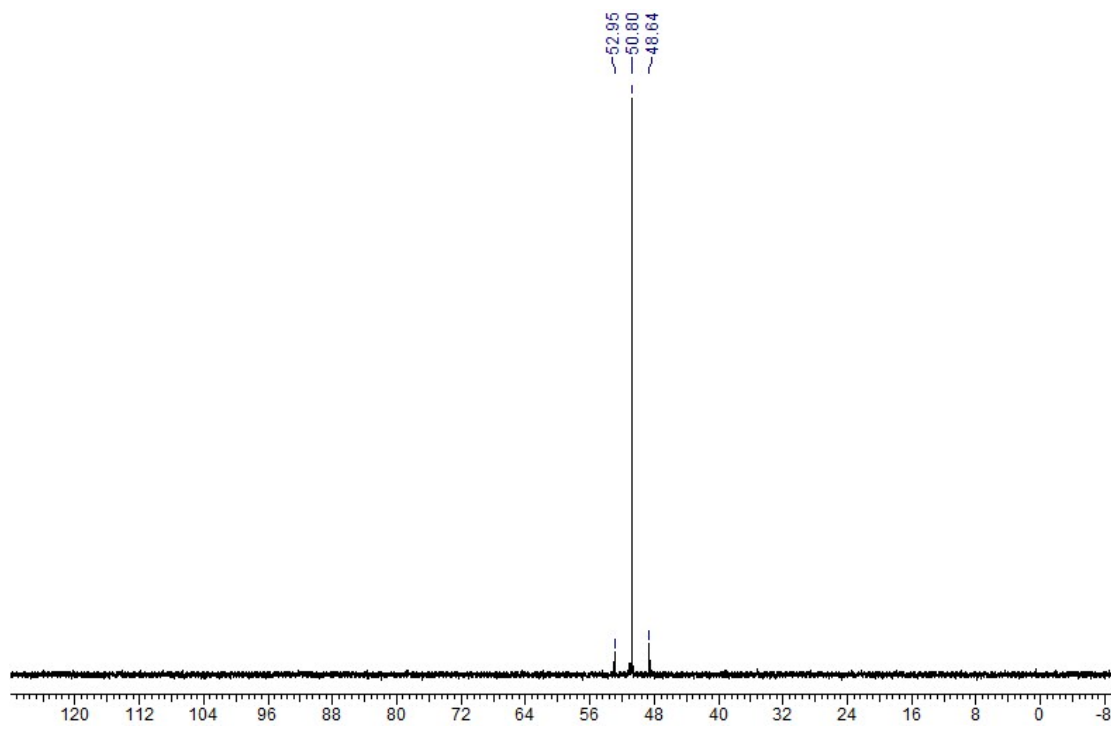

**Reference:**

1. S. Kisan, V. Krishnakumar and C. Gunanathan, *ACS Catal.* 2017, **7**, 5950-5954.
2. A. Bismuto, M. J. Cowley and S. P. Thomas, *ACS Catal.* 2018, **8**, 2001-2005.
3. G. Zhang, H. Zeng, J. Wu, Z. Yin, S. Zheng, and J. C. Fettinger. *Angew. Chem. Int. Ed.* 2016, **55**, 14369 –14372.
4. S. Mandal, P. K. Verma and K. Geetharani, *Chem. Commun.*, 2018, **54**, 13690-13693.
